# Supplementary material for: Complexes of Gold(III) with Hydrazones Derived from Pyridoxal: Stability, Structure, and Nature of UV-Vis Spectra
Source: MDPI journal article supplement (doi:10.3390/ijms25095046), 2024-05-06
Supplement: s1 [file s1]

# Supporting Information for

## **Complexes of Gold(III) with Hydrazones Derived from Pyridoxal: Stability, Structure, and Nature of UV-Vis Spectra**

**Natalia N. Kuranova, Oleg A. Pimenov, Maksim N. Zavalishin and George A. Gamov \***

Department of General Chemical Technology, Ivanovo State University of Chemistry and Technology, Sheremetevskii pr. 7, Ivanovo 153000, Russia; kuranova\_nn@isuct.ru (N.N.K.); pimenov@isuct.ru (O.A.P.); zavalishin00@gmail.com (M.N.Z.)

\* Correspondence: ggamov@isuct.ru; Tel.: +7(915)821 85 62.

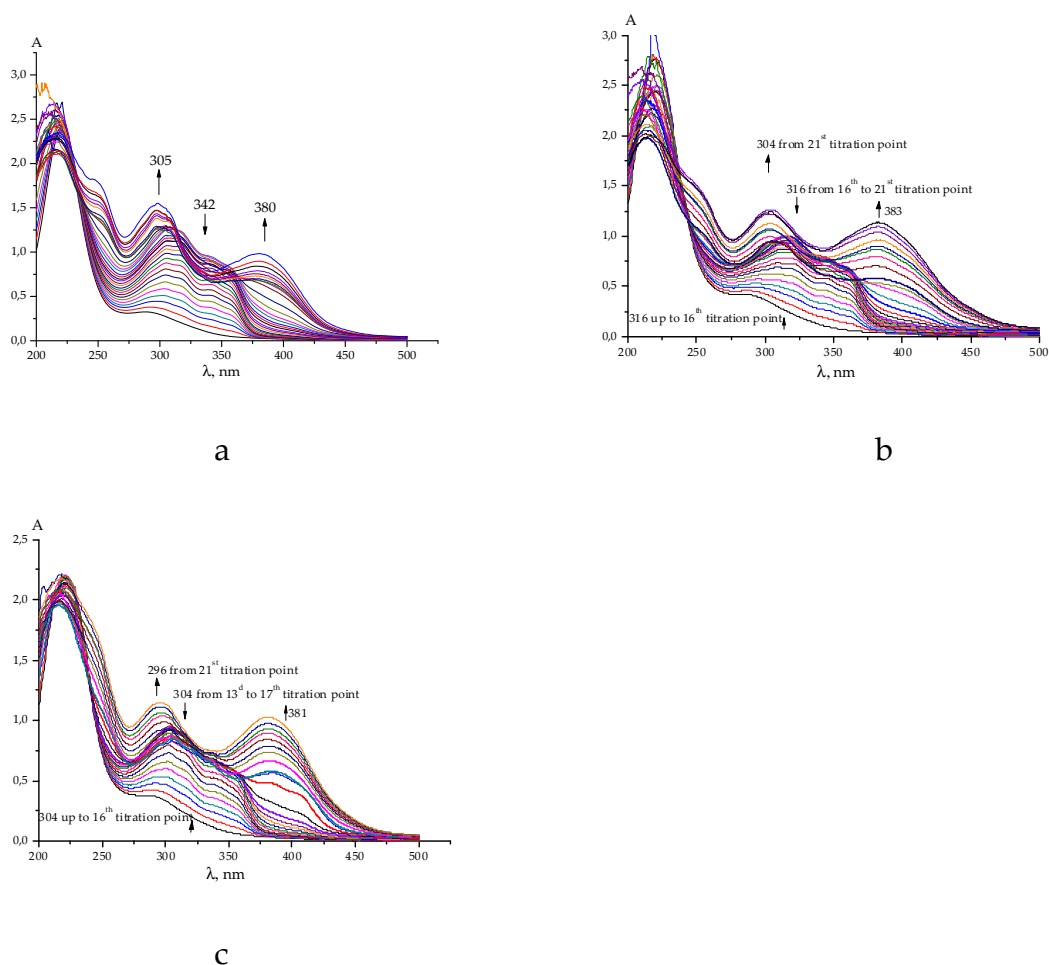

**Figure S1.** Examples of UV-Vis spectra acquired during the titration of: a)  $202.4 \mu\text{M H[AuCl}_4\text{]} + 299.4 \mu\text{M HClO}_4$  by  $1.433 \text{ mM PL-T3H} + 9.928 \text{ mM NaOH}$ ; b)  $202.4 \mu\text{M H[AuCl}_4\text{]} + 299.4 \mu\text{M HClO}_4$  by  $1.465 \text{ mM PL-F2H} + 10.84 \text{ mM NaOH}$ ; c)  $202.4 \mu\text{M H[AuCl}_4\text{]} + 299.4 \mu\text{M HClO}_4$  by  $1.642 \text{ mM PL-F3H} + 10.80 \text{ mM NaOH}$  in water. Initial volume 2.7 mL, 25 to 30 titration points, titrant volume =  $10 \mu\text{L}$

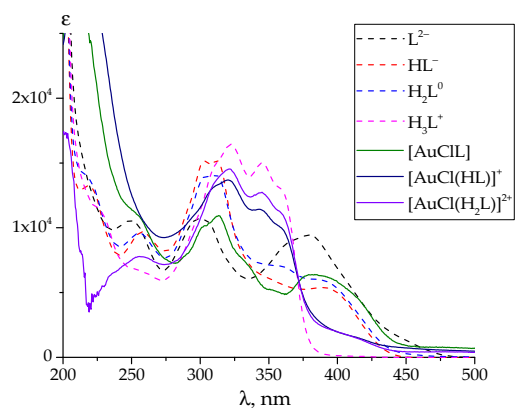

a

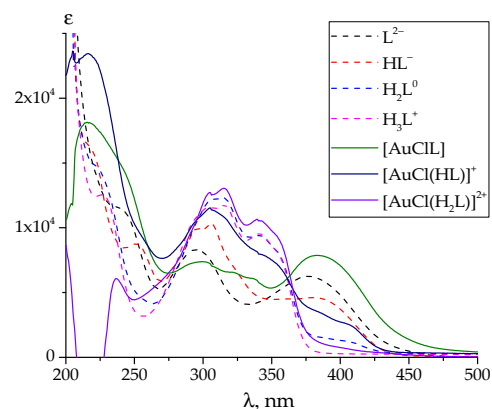

b

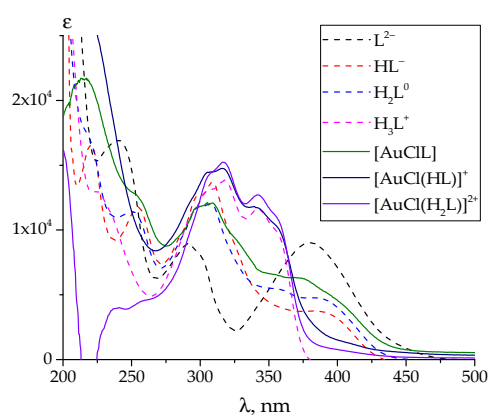

c

**Figure S2.** Calculated UV-Vis spectra of the individual protonated and complex species of **PL-F2H** (a), **PL-F3H** (b), **PL-T3H** (c). Spectra of the protonated species are adopted from the paper 10.1016/j.molliq.2023.123049

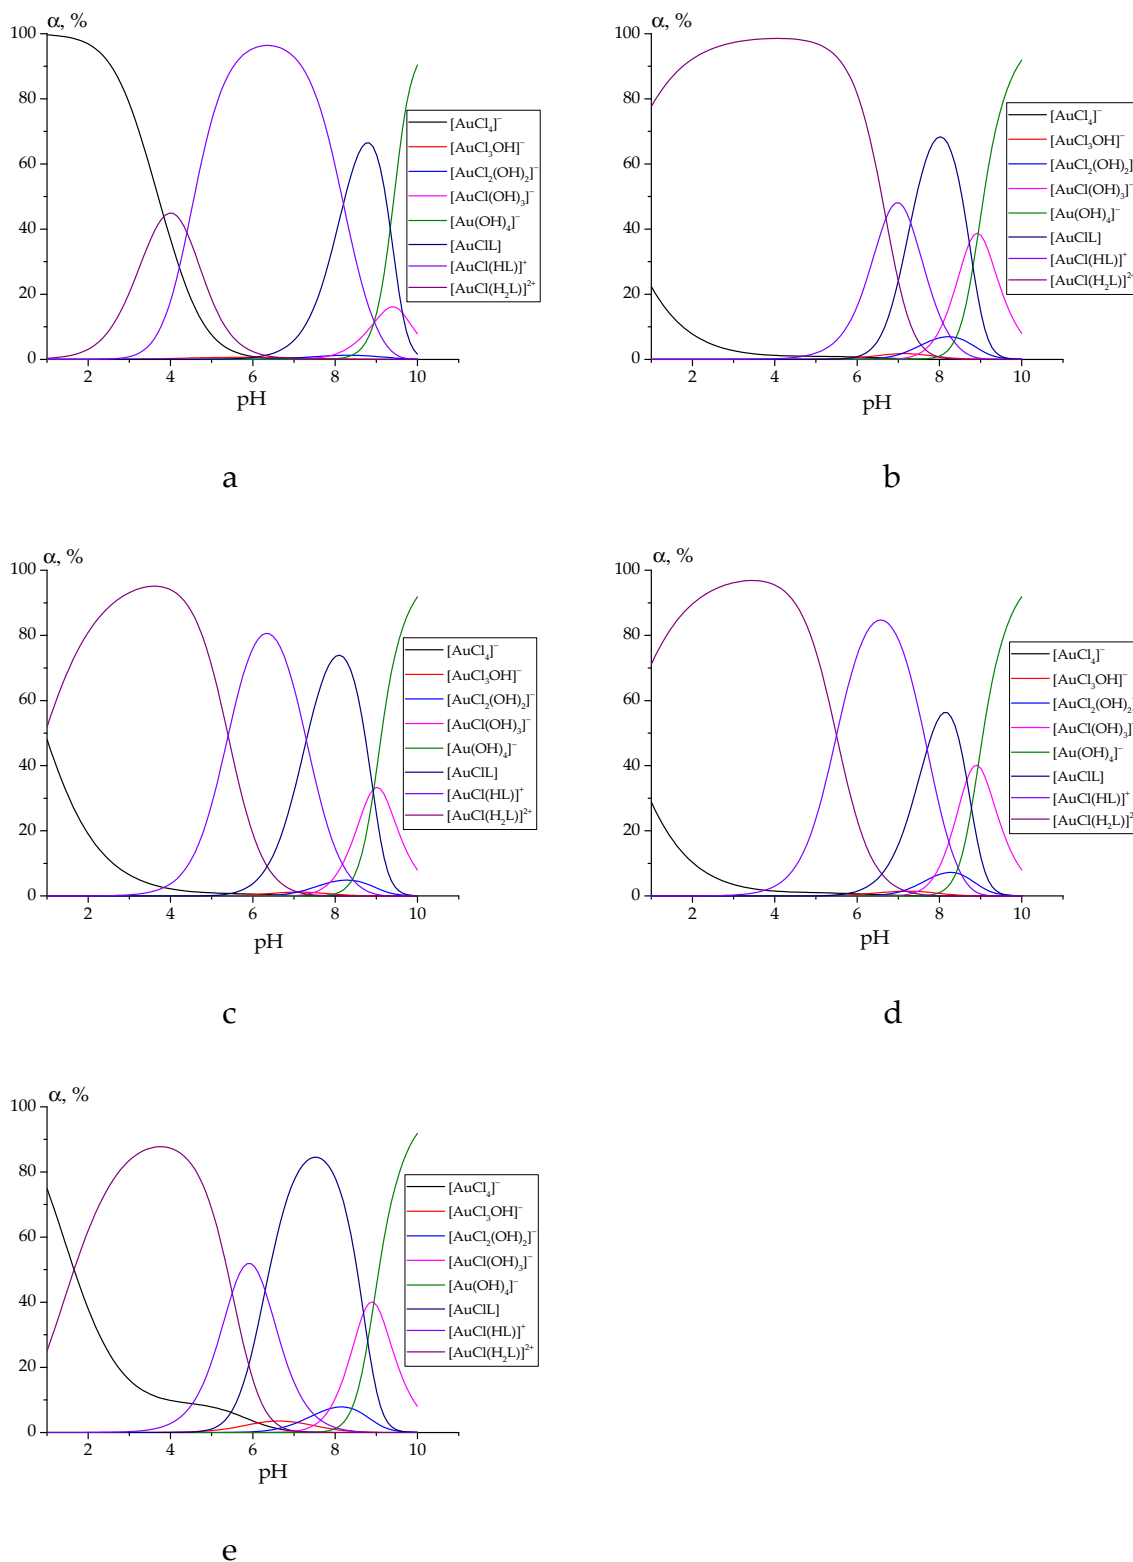

**Figure S3.** Speciation diagrams for the solutions containing 0.1 mmol L<sup>-1</sup> of H[AuCl<sub>4</sub>] and 0.1 mmol L<sup>-1</sup> of hydrazones: **PL-INH** (a); **PL-F2H** (b); **PL-F3H** (c); **PL-T2H** (d); **PL-T3H** (e). Charges of ionic species are omitted for clarity

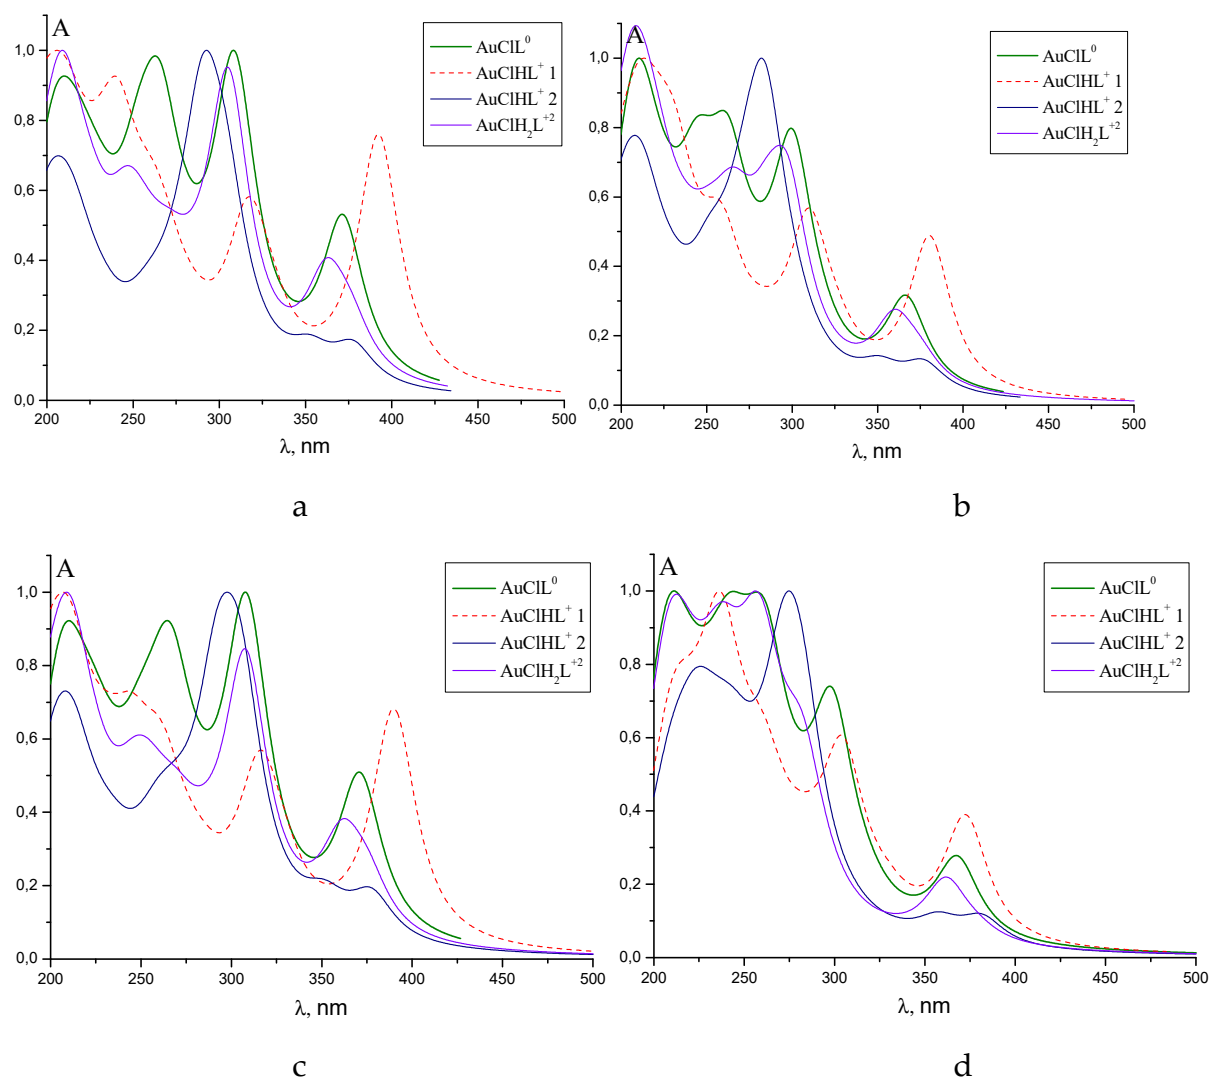

**Figure S4.** TD DFT simulated UV-Vis spectra of different protonated gold(III) complexes with: a) **PL-F2H**; b) **PL-T3H**; c) **PL-T2H**; d) **PL-INH** hydrazone.  $\text{AuCIHL}^+ 1$  and  $\text{AuCIHL}^+ 2$  refer to the single-protonated complexes, where proton is bound with heterocyclic nitrogen of **PL** and hydrazide nitrogen, respectively

**Table S1.** Optimized geometry (*xyz*-coordinates) of different protonated species of complex formed by gold(III) and hydrazone derived from pyridoxal and 2-furoylhydrazide (**PL-F2H**)

Deprotonated complex, [AuClL]

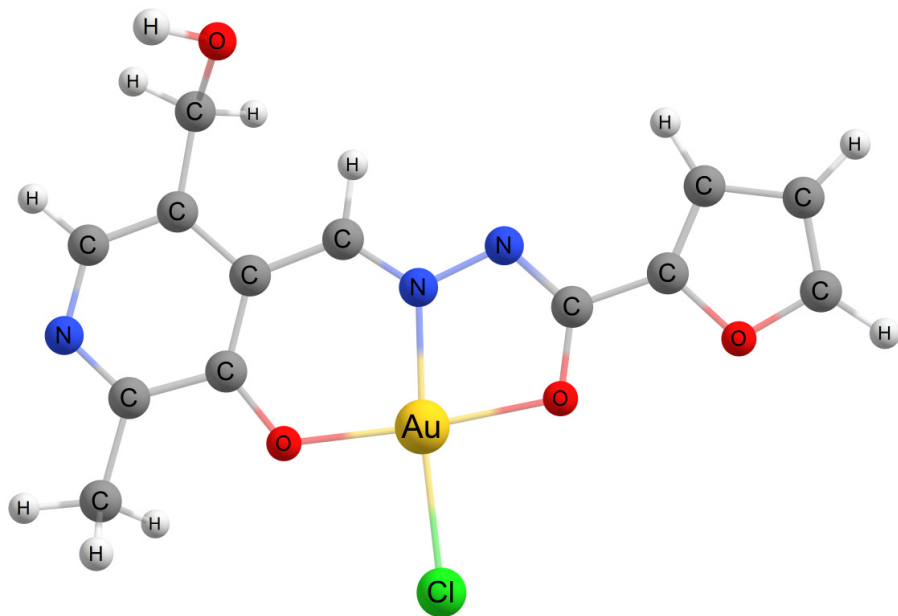

|   |              |              |              |
|---|--------------|--------------|--------------|
| 6 | -3.940416000 | -0.595691000 | -0.040147000 |
| 6 | -2.554862000 | -0.232500000 | -0.048270000 |
| 6 | -2.219681000 | 1.140408000  | -0.118699000 |
| 6 | -3.285288000 | 2.083497000  | -0.196916000 |
| 6 | -4.575453000 | 1.611915000  | -0.182469000 |
| 7 | -4.896083000 | 0.307514000  | -0.104891000 |
| 1 | -5.405820000 | 2.305027000  | -0.237370000 |
| 6 | -4.320623000 | -2.042943000 | 0.045812000  |
| 1 | -3.918105000 | -2.501645000 | 0.950612000  |
| 1 | -3.915309000 | -2.605887000 | -0.796813000 |
| 1 | -5.403729000 | -2.131468000 | 0.049133000  |
| 8 | -1.726701000 | -1.261313000 | 0.013276000  |
| 6 | -0.875662000 | 1.649115000  | -0.117798000 |
| 1 | -0.725184000 | 2.719729000  | -0.129822000 |
| 6 | -3.052999000 | 3.571399000  | -0.307330000 |
| 1 | -4.017109000 | 4.066796000  | -0.437043000 |
| 1 | -2.448628000 | 3.805444000  | -1.184364000 |
| 8 | -2.342647000 | 4.128651000  | 0.802577000  |
| 7 | 0.203786000  | 0.940724000  | -0.076139000 |
| 7 | 1.440346000  | 1.525991000  | -0.081085000 |
| 6 | 2.396635000  | 0.636944000  | -0.038339000 |
| 8 | 2.208376000  | -0.667184000 | 0.006490000  |

|    |              |              |              |
|----|--------------|--------------|--------------|
| 6  | 3.768447000  | 1.100592000  | -0.040859000 |
| 6  | 4.322260000  | 2.349542000  | -0.082048000 |
| 6  | 5.729736000  | 2.163510000  | -0.059795000 |
| 1  | 3.782749000  | 3.278880000  | -0.123036000 |
| 1  | 6.489383000  | 2.924948000  | -0.080368000 |
| 8  | 4.753779000  | 0.155706000  | 0.005449000  |
| 6  | 5.934039000  | 0.819552000  | -0.006882000 |
| 79 | 0.239722000  | -1.046569000 | 0.010039000  |
| 17 | 0.489833000  | -3.362358000 | 0.114320000  |
| 1  | 6.818243000  | 0.208919000  | 0.025663000  |
| 1  | -2.857323000 | 3.969758000  | 1.601820000  |

Monoprotonated complex,  $[\text{AuCl}(\text{HL})]^+$  1, proton is bound with heterocyclic nitrogen of pyridoxal

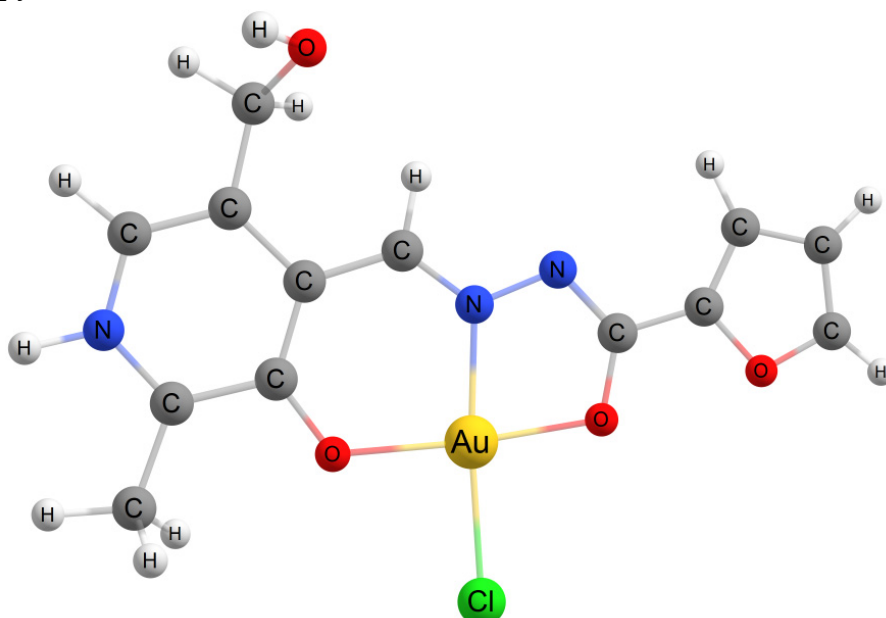

|   |              |              |              |
|---|--------------|--------------|--------------|
| 6 | -3.892090000 | -0.628133000 | -0.047443000 |
| 6 | -2.524563000 | -0.243306000 | -0.043976000 |
| 6 | -2.200630000 | 1.137788000  | -0.108360000 |
| 6 | -3.257852000 | 2.088653000  | -0.191864000 |
| 6 | -4.552333000 | 1.650538000  | -0.191120000 |
| 7 | -4.816191000 | 0.327061000  | -0.119032000 |
| 1 | -5.404898000 | 2.306199000  | -0.246072000 |
| 6 | -4.306513000 | -2.052966000 | 0.025549000  |
| 1 | -3.918616000 | -2.508718000 | 0.936820000  |
| 1 | -3.883728000 | -2.607575000 | -0.812446000 |
| 1 | -5.389000000 | -2.150822000 | 0.009224000  |
| 8 | -1.703565000 | -1.266016000 | 0.020645000  |
| 6 | -0.853727000 | 1.653908000  | -0.103685000 |
| 1 | -0.706411000 | 2.724031000  | -0.109689000 |
| 6 | -3.016129000 | 3.581109000  | -0.295560000 |
| 1 | -3.976431000 | 4.085189000  | -0.410278000 |

|    |              |              |              |
|----|--------------|--------------|--------------|
| 1  | -2.427074000 | 3.801410000  | -1.185611000 |
| 8  | -2.283803000 | 4.111929000  | 0.802517000  |
| 7  | 0.224264000  | 0.942766000  | -0.066958000 |
| 7  | 1.449654000  | 1.523347000  | -0.073159000 |
| 6  | 2.412815000  | 0.631563000  | -0.035751000 |
| 8  | 2.221658000  | -0.669934000 | 0.008253000  |
| 6  | 3.777228000  | 1.096493000  | -0.044988000 |
| 6  | 4.324689000  | 2.350486000  | -0.090908000 |
| 6  | 5.730395000  | 2.171751000  | -0.076579000 |
| 1  | 3.779486000  | 3.276586000  | -0.130128000 |
| 1  | 6.486435000  | 2.936403000  | -0.102521000 |
| 8  | 4.767644000  | 0.156659000  | -0.003336000 |
| 6  | 5.941480000  | 0.827162000  | -0.023269000 |
| 79 | 0.264466000  | -1.049731000 | 0.014909000  |
| 17 | 0.518116000  | -3.354868000 | 0.114325000  |
| 1  | 6.830042000  | 0.222506000  | 0.004730000  |
| 1  | -2.818371000 | 4.033172000  | 1.600834000  |
| 1  | -5.788397000 | 0.039519000  | -0.119022000 |

Monoprotonated complex,  $[\text{AuCl}(\text{HL})]^+$  2, proton is bound with hydrazide nitrogen

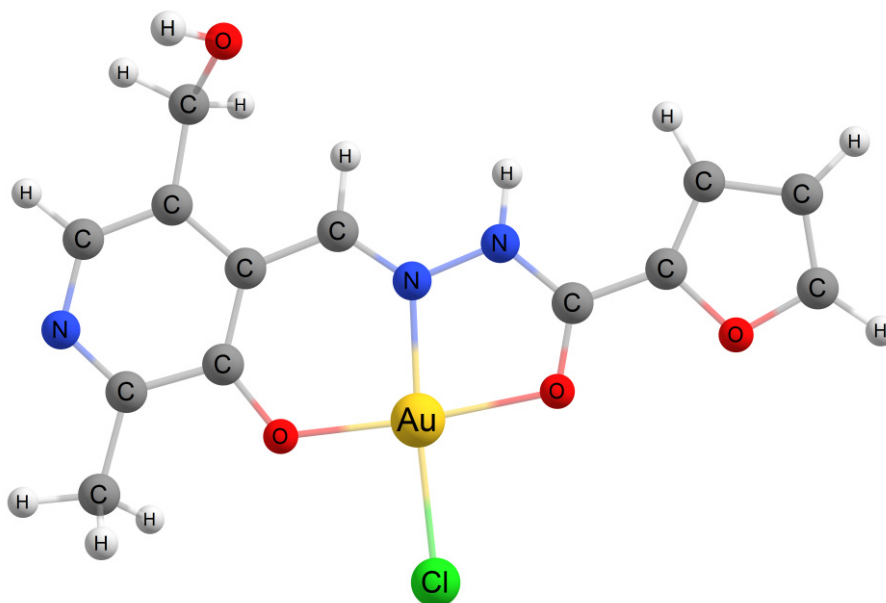

|   |              |              |              |
|---|--------------|--------------|--------------|
| 6 | -3.945657000 | -0.604721000 | -0.028583000 |
| 6 | -2.560045000 | -0.228363000 | -0.039595000 |
| 6 | -2.239777000 | 1.149238000  | -0.106328000 |
| 6 | -3.311412000 | 2.087670000  | -0.181633000 |
| 6 | -4.595120000 | 1.604172000  | -0.163184000 |
| 7 | -4.900280000 | 0.295486000  | -0.087179000 |
| 1 | -5.433408000 | 2.287254000  | -0.213170000 |
| 6 | -4.315434000 | -2.053511000 | 0.055052000  |
| 1 | -3.908710000 | -2.509704000 | 0.959048000  |
| 1 | -3.907074000 | -2.610726000 | -0.789652000 |



|    |              |              |              |
|----|--------------|--------------|--------------|
| 1  | -5.397708000 | -2.148149000 | 0.059412000  |
| 8  | -1.735704000 | -1.260667000 | 0.018775000  |
| 6  | -0.902499000 | 1.668997000  | -0.100907000 |
| 1  | -0.776875000 | 2.744926000  | -0.093730000 |
| 6  | -3.090520000 | 3.577298000  | -0.310636000 |
| 1  | -4.062356000 | 4.070228000  | -0.362843000 |
| 1  | -2.561747000 | 3.805518000  | -1.236848000 |
| 8  | -2.289830000 | 4.138286000  | 0.731980000  |
| 7  | 0.159215000  | 0.939175000  | -0.067621000 |
| 7  | 1.431135000  | 1.460928000  | -0.063624000 |
| 6  | 2.454285000  | 0.591611000  | -0.033001000 |
| 8  | 2.216356000  | -0.666710000 | -0.000369000 |
| 6  | 3.801304000  | 1.066014000  | -0.035569000 |
| 6  | 4.371898000  | 2.315722000  | -0.068150000 |
| 6  | 5.767968000  | 2.111947000  | -0.049070000 |
| 1  | 3.863764000  | 3.264256000  | -0.101075000 |
| 1  | 6.535828000  | 2.864394000  | -0.064684000 |
| 8  | 4.776719000  | 0.109726000  | 0.002131000  |
| 6  | 5.954409000  | 0.760176000  | -0.006547000 |
| 79 | 0.221163000  | -1.054212000 | 0.007521000  |
| 17 | 0.449287000  | -3.342476000 | 0.098311000  |
| 1  | 6.834337000  | 0.142624000  | 0.020288000  |
| 1  | -2.747993000 | 4.016312000  | 1.571302000  |
| 1  | 1.545001000  | 2.466173000  | -0.095735000 |

Bis-protonated complex,  $[\text{AuCl}(\text{H}_2\text{L})]^{2+}$

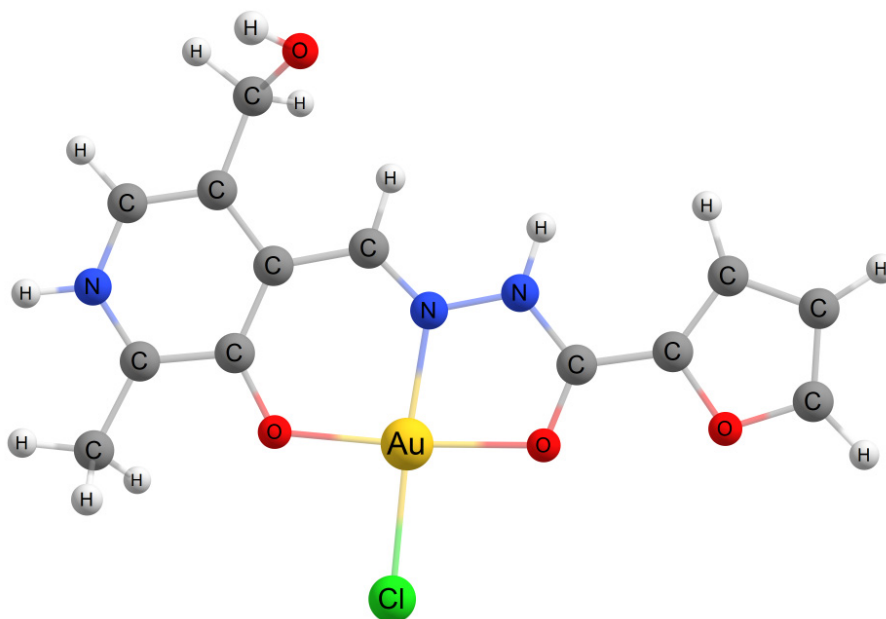

|   |              |              |              |
|---|--------------|--------------|--------------|
| 6 | -3.897832000 | -0.646713000 | -0.035397000 |
| 6 | -2.530256000 | -0.243381000 | -0.036304000 |
| 6 | -2.228321000 | 1.140764000  | -0.096741000 |
| 6 | -3.293346000 | 2.083179000  | -0.175998000 |

|    |              |              |              |
|----|--------------|--------------|--------------|
| 6  | -4.581270000 | 1.627841000  | -0.170037000 |
| 7  | -4.826106000 | 0.299926000  | -0.099676000 |
| 1  | -5.443296000 | 2.271371000  | -0.218270000 |
| 6  | -4.294122000 | -2.075335000 | 0.035404000  |
| 1  | -3.894420000 | -2.528132000 | 0.943072000  |
| 1  | -3.868762000 | -2.620835000 | -0.807340000 |
| 1  | -5.375164000 | -2.185499000 | 0.025018000  |
| 8  | -1.708846000 | -1.266919000 | 0.022527000  |
| 6  | -0.883982000 | 1.674396000  | -0.089328000 |
| 1  | -0.767947000 | 2.750827000  | -0.077098000 |
| 6  | -3.071702000 | 3.579468000  | -0.295571000 |
| 1  | -4.041923000 | 4.075395000  | -0.319169000 |
| 1  | -2.572381000 | 3.800098000  | -1.239102000 |
| 8  | -2.241264000 | 4.115622000  | 0.725410000  |
| 7  | 0.175121000  | 0.947659000  | -0.060492000 |
| 7  | 1.440874000  | 1.467433000  | -0.058142000 |
| 6  | 2.468002000  | 0.594452000  | -0.031337000 |
| 8  | 2.225879000  | -0.664627000 | 0.002015000  |
| 6  | 3.810282000  | 1.063942000  | -0.039306000 |
| 6  | 4.383686000  | 2.315303000  | -0.072932000 |
| 6  | 5.776648000  | 2.109550000  | -0.062145000 |
| 1  | 3.876880000  | 3.264772000  | -0.101079000 |
| 1  | 6.546025000  | 2.860275000  | -0.080842000 |
| 8  | 4.785435000  | 0.106274000  | -0.008746000 |
| 6  | 5.961227000  | 0.755496000  | -0.023092000 |
| 79 | 0.248315000  | -1.050517000 | 0.011717000  |
| 17 | 0.487839000  | -3.328083000 | 0.101256000  |
| 1  | 6.841523000  | 0.137987000  | -0.002639000 |
| 1  | -2.703879000 | 4.064756000  | 1.569827000  |
| 1  | 1.556568000  | 2.473230000  | -0.089710000 |
| 1  | -5.796295000 | 0.002338000  | -0.094415000 |

**Table S2.** Calculated IR spectra of different protonated species of complex formed by gold(III) and hydrazone derived from pyridoxal and 2-furoylhydrazide (**PL-F2H**)

| Deprotonated complex,<br>[AuCIL] |                       | Monoprotonated<br>complex 1,<br>[AuCl(HL)] <sup>+</sup> |                       | Monoprotonated<br>complex 2,<br>[AuCl(HL)] <sup>+</sup> |                       | <i>Bis</i> -protonated complex,<br>[AuCl(H <sub>2</sub> L)] <sup>2+</sup> |                       |
|----------------------------------|-----------------------|---------------------------------------------------------|-----------------------|---------------------------------------------------------|-----------------------|---------------------------------------------------------------------------|-----------------------|
| Frequency,<br>cm <sup>-1</sup>   | Relative<br>intensity | Frequency,<br>cm <sup>-1</sup>                          | Relative<br>intensity | Frequency,<br>cm <sup>-1</sup>                          | Relative<br>intensity | Frequency,<br>cm <sup>-1</sup>                                            | Relative<br>intensity |
| 30.9063                          | 0.559                 | 31.6196                                                 | 9.0936                | 29.5429                                                 | 0.5152                | 29.5591                                                                   | 9.8421                |
| 40.3515                          | 0.5533                | 43.3067                                                 | 0.043                 | 40.0332                                                 | 5                     | 46.4094                                                                   | 3.3321                |
| 48.6975                          | 0.0628                | 54.4983                                                 | 0.0264                | 66.2121                                                 | 0.5052                | 66.7537                                                                   | 5.1087                |
| 67.171                           | 2.4306                | 68.1503                                                 | 4.662                 | 67.8859                                                 | 4.3262                | 72.5748                                                                   | 0.4046                |
| 78.3733                          | 1.4466                | 81.5881                                                 | 4.062                 | 77.4903                                                 | 0.7424                | 78.0745                                                                   | 1.7599                |
| 96.5272                          | 1.1377                | 98.9113                                                 | 0.037                 | 94.5551                                                 | 2.2331                | 98.9013                                                                   | 0.0462                |
| 104.4718                         | 4.5564                | 104.3481                                                | 2.1072                | 108.0259                                                | 0.306                 | 111.4337                                                                  | 0.3255                |
| 109.8207                         | 1.8888                | 110.896                                                 | 4.2337                | 114.3358                                                | 4.0365                | 116.0604                                                                  | 4.696                 |
| 118.1998                         | 0.757                 | 121.339                                                 | 0.3243                | 122.3615                                                | 6.4928                | 125.5158                                                                  | 2.1967                |
| 154.324                          | 0.1338                | 139.173                                                 | 0.7351                | 156.3968                                                | 0.6611                | 145.2937                                                                  | 1.0257                |
| 175.5502                         | 11.0898               | 177.0801                                                | 4.656                 | 172.8465                                                | 5.0638                | 175.5896                                                                  | 2.8129                |
| 186.5855                         | 2.2779                | 184.8734                                                | 4.1538                | 187.9078                                                | 5.0746                | 189.9034                                                                  | 7.2125                |
| 192.9122                         | 1.0332                | 192.1447                                                | 1.689                 | 191.2357                                                | 3.2502                | 193.5812                                                                  | 3.8668                |
| 203.5387                         | 0.316                 | 208.4859                                                | 2.2278                | 201.0388                                                | 1.1226                | 205.6251                                                                  | 4.6264                |
| 225.2466                         | 0.8611                | 223.0042                                                | 2.1451                | 222.4465                                                | 1.5244                | 221.4719                                                                  | 1.9307                |
| 242.8203                         | 6.9884                | 244.9556                                                | 4.9214                | 238.1258                                                | 13.3445               | 242.2587                                                                  | 8.0653                |
| 255.2082                         | 1.5517                | 255.0745                                                | 0.7284                | 246.8971                                                | 2.8593                | 250.7354                                                                  | 2.5879                |
| 276.238                          | 0.7805                | 272.3225                                                | 3.1098                | 271.8125                                                | 0.4423                | 272.2925                                                                  | 4.835                 |
| 310.5977                         | 145.4232              | 303.5913                                                | 143.3149              | 318.8155                                                | 88.0486               | 320.1907                                                                  | 69.1188               |
| 325.9656                         | 70.3303               | 333.7867                                                | 72.8964               | 339.7339                                                | 12.4608               | 343.9318                                                                  | 17.2042               |
| 343.3474                         | 9.414                 | 341.1857                                                | 11.3567               | 347.6232                                                | 68.0174               | 355.5864                                                                  | 64.9961               |
| 363.3928                         | 72.9489               | 361.3273                                                | 54.9447               | 366.4191                                                | 110.2674              | 369.0654                                                                  | 107.8513              |
| 402.0155                         | 4.0727                | 396.4765                                                | 8.852                 | 384.8483                                                | 9.3023                | 391.8255                                                                  | 9.2986                |
| 420.6409                         | 18.4159               | 422.0359                                                | 14.1356               | 397.8193                                                | 4.5132                | 411.6685                                                                  | 15.3945               |
| 437.4553                         | 1.4548                | 444.4831                                                | 27.6537               | 417.0992                                                | 9.9498                | 420.5255                                                                  | 5.6547                |
| 448.8285                         | 32.8095               | 459.8243                                                | 1.9041                | 447.7846                                                | 37.6632               | 444.4936                                                                  | 31.1922               |
| 500.5801                         | 48.0072               | 500.0449                                                | 26.9701               | 495.9189                                                | 61.4053               | 496.0544                                                                  | 42.4439               |
| 531.8029                         | 9.1613                | 529.6046                                                | 16.4355               | 506.6061                                                | 122.9213              | 529.8211                                                                  | 19.9491               |
| 572.4848                         | 7.0075                | 567.3495                                                | 1.7604                | 530.5088                                                | 13.3756               | 533.7375                                                                  | 117.4133              |
| 578.089                          | 26.1149               | 571.1001                                                | 8.0647                | 565.3865                                                | 3.8328                | 565.4614                                                                  | 6.7506                |
| 608.9033                         | 13.0561               | 605.9048                                                | 13.8298               | 572.7417                                                | 30.7303               | 565.8408                                                                  | 3.3341                |
| 613.5277                         | 22.3315               | 610.3448                                                | 5.7906                | 598.8214                                                | 22.0132               | 595.8743                                                                  | 24.4302               |
| 631.3507                         | 7.5212                | 630.5642                                                | 9.283                 | 607.721                                                 | 40.0111               | 605.182                                                                   | 10.7711               |
| 647.0861                         | 70.0654               | 654.5867                                                | 31.5069               | 621.0432                                                | 2.6598                | 619.5525                                                                  | 3.7922                |
| 659.5009                         | 6.6962                | 662.6793                                                | 16.7933               | 633.5853                                                | 95.2682               | 645.27                                                                    | 64.4373               |
| 685.1941                         | 39.7707               | 686.7514                                                | 31.6035               | 651.9094                                                | 9.4865                | 655.7829                                                                  | 17.5174               |
| 742.6717                         | 16.7236               | 744.7955                                                | 21.1513               | 683.4624                                                | 15.004                | 685.3866                                                                  | 11.6765               |
| 758.6671                         | 1.1301                | 760.4113                                                | 4.5855                | 738.1838                                                | 12.5415               | 738.5011                                                                  | 13.4996               |
| 776.2125                         | 5.046                 | 775.3475                                                | 0.6978                | 757.9423                                                | 2.4108                | 760.1636                                                                  | 7.9897                |
| 776.8152                         | 87.6965               | 783.7238                                                | 83.2779               | 774.2982                                                | 5.5928                | 777.8198                                                                  | 7.331                 |

|          |          |          |          |          |          |          |          |
|----------|----------|----------|----------|----------|----------|----------|----------|
| 804.041  | 2.6954   | 791.5785 | 47.7292  | 797.064  | 80.7766  | 796.1056 | 45.5832  |
| 865.4117 | 5.4559   | 834.8928 | 77.8165  | 802.487  | 1.6893   | 801.2793 | 75.8319  |
| 896.8933 | 8.3079   | 873.1661 | 3.4078   | 887.7967 | 10.5331  | 841.5034 | 89.2033  |
| 903.6966 | 81.6581  | 896.6011 | 10.3728  | 891.2787 | 0.7219   | 887.9111 | 7.3314   |
| 918.5819 | 30.0282  | 903.5305 | 128.3822 | 903.1767 | 76.0266  | 899.2666 | 0.303    |
| 922.2454 | 1.0586   | 917.2712 | 2.2662   | 920.1467 | 29.5146  | 902.9448 | 93.3631  |
| 949.7814 | 7.5754   | 929.0635 | 1.0079   | 942.9331 | 1.033    | 926.2232 | 2.3839   |
| 957.4826 | 36.5924  | 936.8241 | 11.4182  | 958.4159 | 87.9381  | 949.0749 | 0.9768   |
| 966.2128 | 23.9467  | 960.4489 | 29.9292  | 964.8179 | 60.3158  | 959.6624 | 114.6978 |
| 988.727  | 69.7237  | 967.9068 | 28.6803  | 975.7674 | 11.807   | 963.73   | 39.596   |
| 1018.489 | 69.1009  | 1001.078 | 87.3727  | 988.4258 | 68.0195  | 976.8279 | 28.6437  |
| 1026.313 | 224.2808 | 1028.087 | 279.2122 | 1027.283 | 85.1703  | 1004.165 | 41.6419  |
| 1040.158 | 14.8511  | 1040.019 | 125.3869 | 1043.358 | 47.1924  | 1042.398 | 37.8632  |
| 1054.145 | 1.7612   | 1047.562 | 51.4205  | 1054.753 | 1.7443   | 1050.834 | 147.009  |
| 1072.418 | 13.9833  | 1057.277 | 8.2553   | 1063.598 | 106.9392 | 1058.151 | 8.9463   |
| 1092.596 | 18.0448  | 1083.166 | 22.7247  | 1071.507 | 20.9596  | 1066.876 | 97.3231  |
| 1107.767 | 37.0227  | 1094.905 | 80.8149  | 1120.032 | 7.4618   | 1080.033 | 39.5717  |
| 1156.261 | 231.759  | 1112.009 | 28.5668  | 1123.368 | 251.3335 | 1119.979 | 66.2616  |
| 1198.588 | 16.5949  | 1157.753 | 517.9159 | 1174.412 | 197.8954 | 1126.653 | 282.9321 |
| 1202.907 | 41.8624  | 1207.086 | 9.458    | 1198.828 | 221.6494 | 1175.885 | 280.2056 |
| 1216.871 | 389.5201 | 1208.682 | 110.7025 | 1206.025 | 63.5652  | 1208.929 | 16.5549  |
| 1258.375 | 25.8794  | 1225.193 | 309.2734 | 1224.773 | 135.2969 | 1214.561 | 182.3495 |
| 1290.015 | 199.5721 | 1258.566 | 26.616   | 1278.832 | 5.7418   | 1226.338 | 225.5993 |
| 1316.161 | 22.3758  | 1269.052 | 262.9479 | 1293.444 | 219.0745 | 1264.398 | 166.8084 |
| 1324.065 | 94.2244  | 1325.043 | 47.9886  | 1311.59  | 66.4654  | 1280.27  | 20.9721  |
| 1349.312 | 289.3315 | 1331.262 | 7.9785   | 1322.491 | 178.5518 | 1317.018 | 71.9504  |
| 1371.374 | 11.7456  | 1363.318 | 384.6089 | 1367.629 | 170.9493 | 1337.887 | 124.5318 |
| 1391.266 | 142.3049 | 1376.162 | 11.09    | 1376.045 | 53.7396  | 1375.059 | 111.3084 |
| 1405.466 | 102.6694 | 1392.241 | 232.7108 | 1387.523 | 19.9571  | 1385.522 | 77.8528  |
| 1410.798 | 34.472   | 1408.054 | 70.8455  | 1407.789 | 43.0056  | 1390.328 | 122.4926 |
| 1414.736 | 12.5952  | 1412.906 | 72.8939  | 1411.009 | 28.7944  | 1407.127 | 45.0394  |
| 1425.913 | 42.9504  | 1422.131 | 2.1644   | 1415.182 | 150.0294 | 1416.478 | 223.8847 |
| 1464.805 | 26.0514  | 1430.176 | 11.5851  | 1436.763 | 255.6931 | 1420.696 | 51.4897  |
| 1466.325 | 11.0531  | 1439.332 | 99.4338  | 1453.502 | 288.8823 | 1434.91  | 38.4242  |
| 1484.404 | 10.9298  | 1451.583 | 17.8742  | 1464.567 | 2.8703   | 1439.584 | 360.7056 |
| 1500.631 | 407.2516 | 1481.175 | 693.7811 | 1466.763 | 11.826   | 1450.298 | 21.6806  |
| 1513.264 | 9.1683   | 1489.569 | 1254.312 | 1483.861 | 35.829   | 1452.92  | 363.5834 |
| 1541.662 | 725.0253 | 1505.228 | 111.8033 | 1505.36  | 343.2988 | 1483.816 | 12.6279  |
| 1554.11  | 210.0614 | 1512.739 | 77.6044  | 1510.821 | 101.425  | 1501.317 | 226.7291 |
| 1598.222 | 8.2076   | 1531.51  | 639.8777 | 1545.637 | 247.041  | 1509.531 | 143.6442 |
| 1610.634 | 147.4035 | 1594.953 | 234.629  | 1579.134 | 190.2428 | 1522.978 | 341.0862 |
| 1653.089 | 206.9368 | 1620.71  | 56.5201  | 1600.435 | 47.5807  | 1573.417 | 292.6501 |
| 3035.148 | 39.9836  | 1648.832 | 54.7368  | 1626.91  | 1254.479 | 1617.482 | 56.7048  |
| 3035.423 | 57.2428  | 1668.63  | 72.4297  | 1669.433 | 47.3854  | 1628.222 | 1451.272 |
| 3076.854 | 28.1347  | 3047.789 | 56.4864  | 3037.93  | 15.2904  | 1660.862 | 51.8355  |
| 3080.862 | 17.4811  | 3049.229 | 2.4257   | 3041.923 | 60.6501  | 1683.86  | 10.1027  |



**Table S3.** Calculated TD-DFT spectra of different protonated species of complex formed by gold(III) and hydrazone derived from pyridoxal and 2-furoylhydrazide (**PL-F2H**)

| Deprotonated complex, [AuClL] |                     | Monoprotonated complex 1, [AuCl(HL)] <sup>+</sup> |                     | Monoprotonated complex 2, [AuCl(HL)] <sup>+</sup> |                     | <i>Bis</i> -protonated complex, [AuCl(H <sub>2</sub> L)] <sup>2+</sup> |                     |
|-------------------------------|---------------------|---------------------------------------------------|---------------------|---------------------------------------------------|---------------------|------------------------------------------------------------------------|---------------------|
| $\lambda$ , nm                | oscillator strength | $\lambda$ , nm                                    | oscillator strength | $\lambda$ , nm                                    | oscillator strength | $\lambda$ , nm                                                         | oscillator strength |
| 481.54                        | 0                   | 449.7                                             | 0.0001              | 525.41                                            | 0                   | 454.34                                                                 | 0                   |
| 371.98                        | 0.1136              | 392.34                                            | 0.5588              | 377.82                                            | 0.117               | 376.12                                                                 | 0.1057              |
| 371.51                        | 0.2062              | 347.93                                            | 0.0001              | 367.47                                            | 0.0002              | 366.31                                                                 | 0                   |
| 317.45                        | 0.0298              | 328.16                                            | 0.0756              | 352.67                                            | 0.0803              | 362.1                                                                  | 0.2309              |
| 313                           | 0.0003              | 327.97                                            | 0.0075              | 327.04                                            | 0.0001              | 320.74                                                                 | 0.0001              |
| 308.44                        | 0.5742              | 316.57                                            | 0.3157              | 308.7                                             | 0.049               | 305.19                                                                 | 0.7245              |
| 292.77                        | 0.0003              | 294.84                                            | 0.0001              | 303.51                                            | 0.3588              | 299.29                                                                 | 0                   |
| 291.43                        | 0.0028              | 283.82                                            | 0.0348              | 301.98                                            | 0.0007              | 285.41                                                                 | 0.0392              |
| 279.46                        | 0.0363              | 269.28                                            | 0.0684              | 290.76                                            | 0.7339              | 271.77                                                                 | 0.1329              |
| 265.51                        | 0.3924              | 268.02                                            | 0.0674              | 276.71                                            | 0.1063              | 261.3                                                                  | 0.062               |
| 253.08                        | 0.2161              | 259.42                                            | 0.1633              | 265.36                                            | 0.0214              | 252.33                                                                 | 0.1293              |
| 249.19                        | 0.0026              | 249.82                                            | 0.0048              | 259.43                                            | 0.0805              | 245.34                                                                 | 0.1845              |
| 243.24                        | 0.0015              | 241.25                                            | 0.3837              | 252.17                                            | 0.0286              | 243.06                                                                 | 0.0066              |
| 237.41                        | 0.02                | 236.29                                            | 0.009               | 237.33                                            | 0.0062              | 236.76                                                                 | 0.005               |
| 230.47                        | 0.0605              | 230.7                                             | 0.0002              | 232.98                                            | 0.0687              | 229.62                                                                 | 0.0144              |
| 228.2                         | 0.053               | 230.17                                            | 0.0923              | 224.46                                            | 0.0321              | 225.99                                                                 | 0.1049              |
| 221.9                         | 0.0827              | 228.83                                            | 0.0065              | 219.91                                            | 0.0802              | 223.28                                                                 | 0.0006              |
| 216.73                        | 0.0709              | 221.08                                            | 0.0536              | 218.58                                            | 0.0033              | 220.92                                                                 | 0.0085              |
| 214.46                        | 0.052               | 219.67                                            | 0.0022              | 217                                               | 0.0575              | 219.78                                                                 | 0.0572              |
| 213.14                        | 0.005               | 216.11                                            | 0.0037              | 215.73                                            | 0.0026              | 217.95                                                                 | 0.0309              |
| 209.78                        | 0.0834              | 215.93                                            | 0.0581              | 212.35                                            | 0.0131              | 210.47                                                                 | 0.0093              |
| 208.55                        | 0.0157              | 211.21                                            | 0.1484              | 211.91                                            | 0.1506              | 209.79                                                                 | 0.3714              |
| 207.29                        | 0.0035              | 208.71                                            | 0.0323              | 210.5                                             | 0.0056              | 208.4                                                                  | 0.0272              |
| 206.29                        | 0.0013              | 206.54                                            | 0.0152              | 209.39                                            | 0.0927              | 204.51                                                                 | 0.201               |
| 206.04                        | 0.088               | 206.25                                            | 0.1374              | 204.41                                            | 0.0229              | 196.11                                                                 | 0.0051              |
| 204.52                        | 0.0009              | 198.45                                            | 0.0447              | 203.86                                            | 0.01                | 195.48                                                                 | 0.0073              |
| 203.54                        | 0.1314              | 197.53                                            | 0.0253              | 202.09                                            | 0.1134              | 194.78                                                                 | 0.02                |
| 199.68                        | 0.0668              | 195.77                                            | 0.1941              | 199.03                                            | 0.1638              | 193.2                                                                  | 0.1142              |
| 195.81                        | 0.0021              | 191.21                                            | 0.1487              | 196.14                                            | 0.0522              | 191.2                                                                  | 0.0416              |
| 193.92                        | 0.0566              | 190.59                                            | 0.0138              | 195.74                                            | 0.0827              | 189.8                                                                  | 0.0052              |

**Table S4.** Optimized geometry (*xyz*-coordinates) of different protonated species of complex formed by gold(III) and hydrazone derived from pyridoxal and 3-furoylhydrazide (**PL-F3H**)

Deprotonated complex, [AuClL]

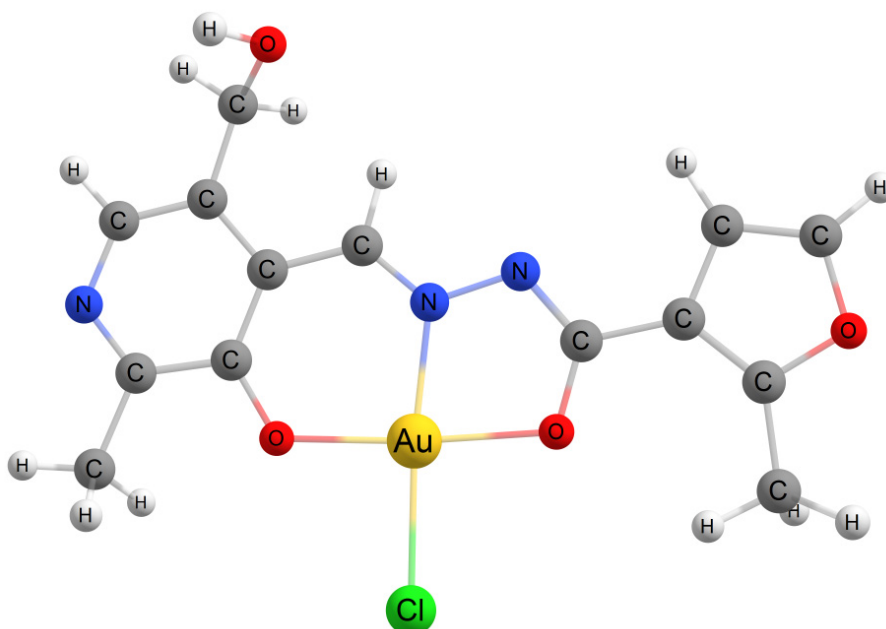

|   |              |              |              |
|---|--------------|--------------|--------------|
| 6 | -4.108948000 | -0.624423000 | -0.041887000 |
| 6 | -2.726044000 | -0.250842000 | -0.048903000 |
| 6 | -2.401628000 | 1.125060000  | -0.112422000 |
| 6 | -3.474524000 | 2.060407000  | -0.182272000 |
| 6 | -4.761128000 | 1.579039000  | -0.168042000 |
| 7 | -5.071772000 | 0.271688000  | -0.098960000 |
| 1 | -5.596804000 | 2.266259000  | -0.216231000 |
| 6 | -4.477781000 | -2.075217000 | 0.034218000  |
| 1 | -4.071108000 | -2.537158000 | 0.935511000  |
| 1 | -4.068465000 | -2.629054000 | -0.812513000 |
| 1 | -5.560155000 | -2.172385000 | 0.037427000  |
| 8 | -1.889495000 | -1.272629000 | 0.006821000  |
| 6 | -1.061095000 | 1.644156000  | -0.113232000 |
| 1 | -0.919424000 | 2.716019000  | -0.121885000 |
| 6 | -3.254050000 | 3.550827000  | -0.282670000 |
| 1 | -4.222261000 | 4.039576000  | -0.407079000 |
| 1 | -2.653178000 | 3.795995000  | -1.159078000 |
| 8 | -2.546112000 | 4.105757000  | 0.830001000  |
| 7 | 0.024411000  | 0.945744000  | -0.077499000 |
| 7 | 1.256633000  | 1.544026000  | -0.082217000 |
| 6 | 2.228309000  | 0.670175000  | -0.044147000 |
| 8 | 2.038077000  | -0.637829000 | -0.002876000 |

|    |              |              |              |
|----|--------------|--------------|--------------|
| 6  | 3.596991000  | 1.156197000  | -0.050203000 |
| 6  | 3.988281000  | 2.540887000  | -0.136108000 |
| 6  | 5.333494000  | 2.553094000  | -0.112374000 |
| 1  | 3.332088000  | 3.389207000  | -0.206160000 |
| 1  | 6.072221000  | 3.332293000  | -0.151529000 |
| 6  | 4.757604000  | 0.424172000  | 0.021554000  |
| 6  | 5.088099000  | -1.016555000 | 0.124976000  |
| 1  | 4.185531000  | -1.607243000 | 0.231077000  |
| 1  | 5.625001000  | -1.350736000 | -0.765583000 |
| 1  | 5.736612000  | -1.195037000 | 0.984502000  |
| 8  | 5.815283000  | 1.272592000  | -0.015951000 |
| 79 | 0.076799000  | -1.038768000 | 0.003119000  |
| 17 | 0.350500000  | -3.353952000 | 0.100707000  |
| 1  | -3.058083000 | 3.936947000  | 1.628944000  |

Monoprotonated complex,  $[\text{AuCl}(\text{HL})]^+$  1, proton is bound with heterocyclic nitrogen of pyridoxal

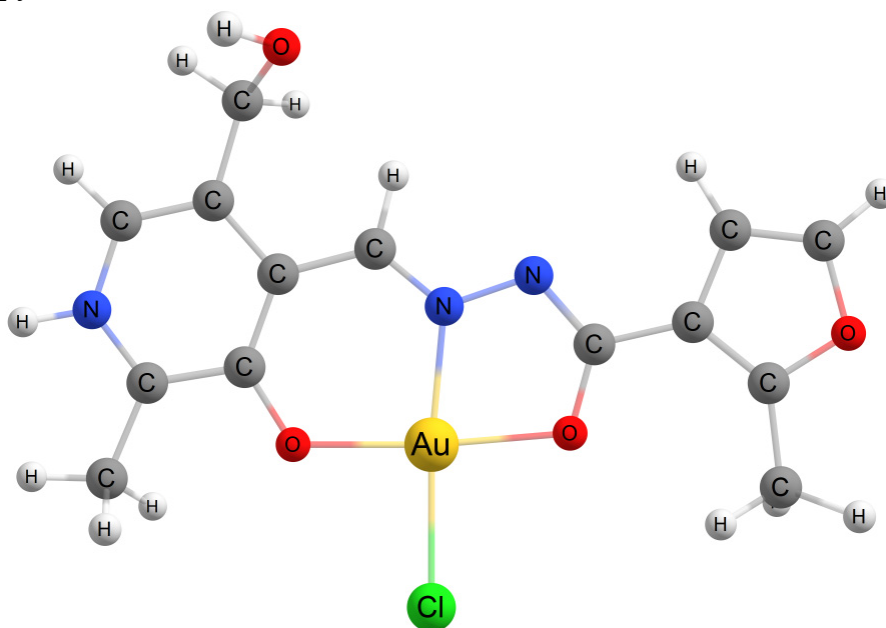

|   |              |              |              |
|---|--------------|--------------|--------------|
| 6 | -4.059094000 | -0.661989000 | -0.047064000 |
| 6 | -2.694895000 | -0.264107000 | -0.043509000 |
| 6 | -2.384832000 | 1.120514000  | -0.100993000 |
| 6 | -3.451222000 | 2.061645000  | -0.174922000 |
| 6 | -4.741583000 | 1.611251000  | -0.172717000 |
| 7 | -4.992315000 | 0.284726000  | -0.109095000 |
| 1 | -5.600597000 | 2.258993000  | -0.220041000 |
| 6 | -4.458923000 | -2.091455000 | 0.016089000  |
| 1 | -4.063290000 | -2.550372000 | 0.922411000  |
| 1 | -4.032995000 | -2.634988000 | -0.827581000 |
| 1 | -5.540376000 | -2.200601000 | 0.002323000  |
| 8 | -1.863806000 | -1.278062000 | 0.014477000  |
| 6 | -1.042162000 | 1.649547000  | -0.098580000 |



|    |              |              |              |
|----|--------------|--------------|--------------|
| 1  | -0.905683000 | 2.721154000  | -0.100623000 |
| 6  | -3.224575000 | 3.557133000  | -0.269016000 |
| 1  | -4.190364000 | 4.052427000  | -0.375921000 |
| 1  | -2.641712000 | 3.789709000  | -1.160037000 |
| 8  | -2.492780000 | 4.087280000  | 0.829731000  |
| 7  | 0.042936000  | 0.950382000  | -0.068245000 |
| 7  | 1.263123000  | 1.546488000  | -0.072173000 |
| 6  | 2.243277000  | 0.671759000  | -0.042234000 |
| 8  | 2.053026000  | -0.634154000 | -0.006554000 |
| 6  | 3.604453000  | 1.159610000  | -0.053747000 |
| 6  | 3.996848000  | 2.542843000  | -0.158129000 |
| 6  | 5.341383000  | 2.552040000  | -0.137119000 |
| 1  | 3.342074000  | 3.391365000  | -0.237464000 |
| 1  | 6.082743000  | 3.327959000  | -0.186202000 |
| 6  | 4.766065000  | 0.424976000  | 0.026089000  |
| 6  | 5.089734000  | -1.015951000 | 0.139306000  |
| 1  | 4.215052000  | -1.583859000 | 0.436166000  |
| 1  | 5.444891000  | -1.405937000 | -0.817830000 |
| 1  | 5.884722000  | -1.163423000 | 0.870560000  |
| 8  | 5.820665000  | 1.269915000  | -0.023803000 |
| 79 | 0.103881000  | -1.039145000 | 0.005878000  |
| 17 | 0.384904000  | -3.343075000 | 0.096652000  |
| 1  | -3.022604000 | 3.996407000  | 1.629910000  |
| 1  | -5.961699000 | -0.012007000 | -0.108054000 |

Monoprotonated complex,  $[\text{AuCl}(\text{HL})]^+$  2, proton is bound with hydrazide nitrogen

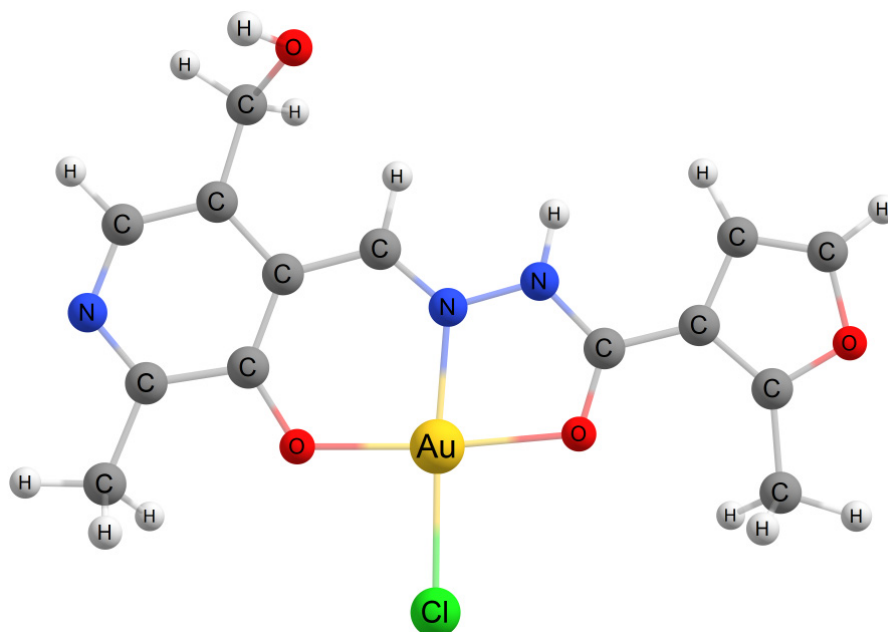

|   |              |              |              |
|---|--------------|--------------|--------------|
| 6 | -4.104376000 | -0.660099000 | -0.038371000 |
| 6 | -2.725449000 | -0.259899000 | -0.043942000 |
| 6 | -2.429499000 | 1.123514000  | -0.100866000 |

|    |              |              |              |
|----|--------------|--------------|--------------|
| 6  | -3.517166000 | 2.043882000  | -0.166239000 |
| 6  | -4.792372000 | 1.538272000  | -0.150989000 |
| 7  | -5.074815000 | 0.223731000  | -0.088319000 |
| 1  | -5.642312000 | 2.207355000  | -0.192976000 |
| 6  | -4.448979000 | -2.115951000 | 0.029779000  |
| 1  | -4.036520000 | -2.574274000 | 0.930087000  |
| 1  | -4.028915000 | -2.657348000 | -0.819471000 |
| 1  | -5.529441000 | -2.229589000 | 0.030333000  |
| 8  | -1.882625000 | -1.277182000 | 0.009539000  |
| 6  | -1.101236000 | 1.666171000  | -0.097145000 |
| 1  | -0.993865000 | 2.743877000  | -0.085752000 |
| 6  | -3.321287000 | 3.538197000  | -0.278409000 |
| 1  | -4.301160000 | 4.015289000  | -0.328436000 |
| 1  | -2.793059000 | 3.786081000  | -1.199902000 |
| 8  | -2.533724000 | 4.100140000  | 0.773759000  |
| 7  | -0.026833000 | 0.955485000  | -0.071820000 |
| 7  | 1.236616000  | 1.498345000  | -0.068477000 |
| 6  | 2.281239000  | 0.654161000  | -0.042053000 |
| 8  | 2.057360000  | -0.610349000 | -0.008716000 |
| 6  | 3.615796000  | 1.162962000  | -0.050919000 |
| 6  | 4.056213000  | 2.534674000  | -0.133372000 |
| 6  | 5.398653000  | 2.489567000  | -0.106134000 |
| 1  | 3.459825000  | 3.427280000  | -0.205855000 |
| 1  | 6.169124000  | 3.236650000  | -0.142625000 |
| 6  | 4.755370000  | 0.381861000  | 0.022227000  |
| 6  | 4.999485000  | -1.073880000 | 0.123313000  |
| 1  | 4.461576000  | -1.498331000 | 0.970355000  |
| 1  | 4.648373000  | -1.587474000 | -0.772584000 |
| 1  | 6.063928000  | -1.258606000 | 0.243338000  |
| 8  | 5.827831000  | 1.185848000  | -0.010671000 |
| 79 | 0.071811000  | -1.034461000 | 0.001608000  |
| 17 | 0.342004000  | -3.318955000 | 0.095028000  |
| 1  | -2.991365000 | 3.957416000  | 1.610102000  |
| 1  | 1.332786000  | 2.505173000  | -0.091338000 |

*Bis*-protonated complex, [AuCl(H<sub>2</sub>L)]<sup>2+</sup>

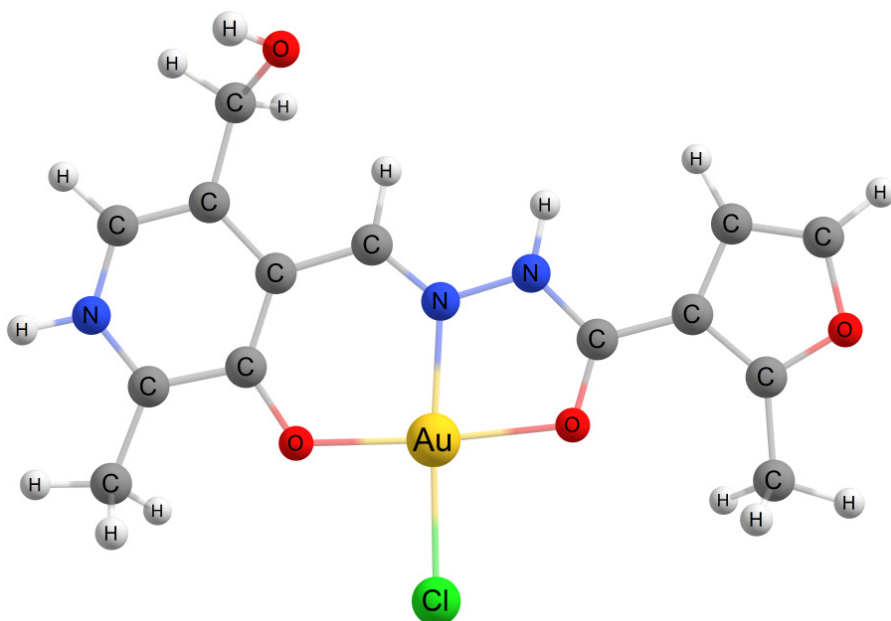

|   |              |              |              |
|---|--------------|--------------|--------------|
| 6 | -4.054907000 | -0.702993000 | -0.043078000 |
| 6 | -2.694679000 | -0.275201000 | -0.041482000 |
| 6 | -2.418401000 | 1.114616000  | -0.093967000 |
| 6 | -3.500299000 | 2.038340000  | -0.162445000 |
| 6 | -4.779947000 | 1.560228000  | -0.156078000 |
| 7 | -5.000148000 | 0.227323000  | -0.097005000 |
| 1 | -5.653685000 | 2.188282000  | -0.196059000 |
| 6 | -4.424924000 | -2.139340000 | 0.014157000  |
| 1 | -4.014193000 | -2.594049000 | 0.915886000  |
| 1 | -3.991888000 | -2.668088000 | -0.835350000 |
| 1 | -5.503786000 | -2.269830000 | 0.005492000  |
| 8 | -1.854512000 | -1.283117000 | 0.011038000  |
| 6 | -1.083680000 | 1.672237000  | -0.089482000 |
| 1 | -0.986594000 | 2.750318000  | -0.074790000 |
| 6 | -3.304200000 | 3.539074000  | -0.267911000 |
| 1 | -4.282687000 | 4.018678000  | -0.291682000 |
| 1 | -2.803776000 | 3.777231000  | -1.206616000 |
| 8 | -2.487830000 | 4.078923000  | 0.762562000  |
| 7 | -0.011496000 | 0.965342000  | -0.066692000 |
| 7 | 1.245645000  | 1.506886000  | -0.065697000 |
| 6 | 2.294939000  | 0.659970000  | -0.039591000 |
| 8 | 2.067685000  | -0.605346000 | -0.004111000 |
| 6 | 3.624919000  | 1.164613000  | -0.051384000 |
| 6 | 4.070956000  | 2.535639000  | -0.126189000 |
| 6 | 5.412353000  | 2.483722000  | -0.106536000 |
| 1 | 3.478900000  | 3.431786000  | -0.187966000 |
| 1 | 6.186922000  | 3.226521000  | -0.141472000 |
| 6 | 4.764511000  | 0.376593000  | 0.009812000  |
| 6 | 5.000162000  | -1.080126000 | 0.099124000  |
| 1 | 4.482189000  | -1.502501000 | 0.959943000  |

|    |              |              |              |
|----|--------------|--------------|--------------|
| 1  | 4.618029000  | -1.586944000 | -0.787857000 |
| 1  | 6.065829000  | -1.273712000 | 0.188591000  |
| 8  | 5.836344000  | 1.175399000  | -0.023114000 |
| 79 | 0.099937000  | -1.029151000 | 0.005882000  |
| 17 | 0.383037000  | -3.302259000 | 0.101794000  |
| 1  | -2.952890000 | 4.009598000  | 1.604339000  |
| 1  | -5.964453000 | -0.088228000 | -0.092368000 |
| 1  | 1.343099000  | 2.514326000  | -0.090249000 |

**Table S5.** Calculated IR spectra of different protonated species of complex formed by gold(III) and hydrazone derived from pyridoxal and 3-furoylhydrazide (PL-F3H)

| Deprotonated complex,<br>[AuCIL] |                       | Monoprotonated<br>complex 1,<br>[AuCl(HL)] <sup>+</sup> |                       | Monoprotonated<br>complex 2,<br>[AuCl(HL)] <sup>+</sup> |                       | Bis-protonated complex,<br>[AuCl(H <sub>2</sub> L)] <sup>2+</sup> |                       |
|----------------------------------|-----------------------|---------------------------------------------------------|-----------------------|---------------------------------------------------------|-----------------------|-------------------------------------------------------------------|-----------------------|
| Frequency,<br>cm <sup>-1</sup>   | Relative<br>intensity | Frequency,<br>cm <sup>-1</sup>                          | Relative<br>intensity | Frequency,<br>cm <sup>-1</sup>                          | Relative<br>intensity | Frequency,<br>cm <sup>-1</sup>                                    | Relative<br>intensity |
| 21.7995                          | 0.1798                | 18.9578                                                 | 0.7969                | 27.9933                                                 | 0.0441                | 27.7333                                                           | 5.3077                |
| 30.2817                          | 0.1505                | 30.4837                                                 | 7.1654                | 32.9847                                                 | 0.2329                | 32.7365                                                           | 2.2158                |
| 41.3928                          | 0.3682                | 34.4767                                                 | 0.6491                | 46.4148                                                 | 4.6036                | 47.2952                                                           | 2.5927                |
| 54.5279                          | 0.9282                | 48.7126                                                 | 0.1779                | 61.6914                                                 | 0.2516                | 61.7632                                                           | 1.4984                |
| 66.3111                          | 1.253                 | 70.1267                                                 | 3.3311                | 72.9984                                                 | 2.764                 | 74.9989                                                           | 5.848                 |
| 77.4295                          | 2.1421                | 81.7726                                                 | 4.9594                | 78.3385                                                 | 1.7611                | 83.4778                                                           | 0.1734                |
| 94.0923                          | 0.4136                | 96.8356                                                 | 0.3616                | 95.595                                                  | 0.8129                | 99.8232                                                           | 0.6348                |
| 105.1605                         | 3.1384                | 104.6679                                                | 1.1896                | 109.2858                                                | 1.0848                | 110.2526                                                          | 1.1961                |
| 109.1253                         | 1.7502                | 109.7963                                                | 4.0891                | 113.0815                                                | 3.5542                | 113.8002                                                          | 4.4103                |
| 119.1922                         | 1.1826                | 122.4276                                                | 0.3299                | 122.7276                                                | 9.4258                | 124.9136                                                          | 4.3277                |
| 154.8682                         | 0.1269                | 140.1484                                                | 0.8423                | 156.1998                                                | 0.6225                | 146.849                                                           | 1.3825                |
| 171.4796                         | 2.6564                | 172.7636                                                | 1.6698                | 162.8152                                                | 4.3196                | 163.8765                                                          | 3.1525                |
| 177.7066                         | 5.9878                | 179.4812                                                | 2.9151                | 175.534                                                 | 3.0273                | 177.3716                                                          | 1.0472                |
| 190.0989                         | 0.1628                | 188.2438                                                | 1.2891                | 187.5299                                                | 1.0085                | 189.3884                                                          | 3.094                 |
| 201.2031                         | 0.3552                | 204.9113                                                | 1.1586                | 198.6821                                                | 1.6765                | 201.4098                                                          | 3.39                  |
| 212.4903                         | 1.0414                | 211.9996                                                | 1.434                 | 210.9777                                                | 3.0595                | 212.1738                                                          | 4.9384                |
| 229.4535                         | 14.1081               | 231.2035                                                | 12.8164               | 230.2983                                                | 10.3377               | 233.0037                                                          | 6.6571                |
| 236.1853                         | 6.5845                | 238.3066                                                | 4.1733                | 235.9538                                                | 10.7965               | 238.7608                                                          | 9.593                 |
| 266.6344                         | 0.59                  | 263.3678                                                | 2.879                 | 267.2103                                                | 0.4701                | 266.4567                                                          | 4.1215                |
| 294.9203                         | 10.0143               | 291.5486                                                | 37.4892               | 284.4329                                                | 1.1144                | 285.4142                                                          | 2.6303                |
| 304.6391                         | 91.5207               | 298.6507                                                | 78.0174               | 308.8124                                                | 64.6628               | 309.4062                                                          | 54.7712               |
| 323.7358                         | 31.3733               | 329.9246                                                | 11.0262               | 334.4075                                                | 19.1043               | 335.4425                                                          | 20.3855               |
| 336.0275                         | 127.3816              | 335.8121                                                | 124.9062              | 340.2411                                                | 10.8802               | 342.488                                                           | 18.194                |
| 345.1463                         | 2.0971                | 343.4198                                                | 8.426                 | 348.4011                                                | 101.9793              | 355.207                                                           | 89.1337               |
| 367.271                          | 38.8522               | 365.847                                                 | 26.1372               | 368.8557                                                | 77.2107               | 370.1156                                                          | 72.7431               |
| 402.7656                         | 5.4519                | 396.8602                                                | 10.73                 | 392.1437                                                | 6.9952                | 392.3444                                                          | 8.9422                |
| 439.6323                         | 17.0144               | 440.1377                                                | 6.0288                | 398.4168                                                | 5.5685                | 417.9835                                                          | 12.7545               |
| 445.287                          | 5.6288                | 448.3326                                                | 38.7455               | 443.2915                                                | 31.0617               | 443.1317                                                          | 12.9212               |
| 451.0076                         | 28.8419               | 466.8408                                                | 2.3805                | 450.978                                                 | 21.6644               | 449.8768                                                          | 29.5418               |
| 509.6462                         | 54.2031               | 509.3571                                                | 27.9843               | 504.5352                                                | 47.5302               | 504.8531                                                          | 31.3226               |
| 531.4864                         | 11.1451               | 530.1186                                                | 19.4527               | 517.8574                                                | 123.189               | 529.7189                                                          | 19.5923               |
| 572.3114                         | 8.6706                | 567.5325                                                | 1.2723                | 530.2456                                                | 20.0731               | 542.0848                                                          | 122.6667              |
| 578.8892                         | 23.3039               | 570.9427                                                | 11.8798               | 565.9641                                                | 7.3362                | 565.0572                                                          | 2.8145                |
| 603.2731                         | 28.2892               | 602.5359                                                | 6.2908                | 573.5233                                                | 30.3502               | 565.9791                                                          | 15.1038               |
| 617.1722                         | 10.6451               | 616.0855                                                | 11.6037               | 593.0729                                                | 53.5838               | 596.0329                                                          | 17.5721               |
| 639.9266                         | 34.0723               | 643.1725                                                | 9.6297                | 612.9697                                                | 2.3915                | 611.1058                                                          | 1.6606                |
| 649.9213                         | 1.0564                | 652.7447                                                | 1.2748                | 630.0486                                                | 55.4181               | 633.5691                                                          | 30.4698               |
| 657.8046                         | 15.4282               | 659.4567                                                | 16.9363               | 651.8308                                                | 14.2257               | 655.1253                                                          | 16.0071               |
| 682.9435                         | 61.8003               | 684.6782                                                | 49.7661               | 655.474                                                 | 6.6415                | 656.0382                                                          | 7.0345                |

|           |          |           |          |           |          |           |          |
|-----------|----------|-----------|----------|-----------|----------|-----------|----------|
| 700.5098  | 19.4389  | 703.7206  | 15.9673  | 682.2662  | 27.8823  | 684.3646  | 26.5003  |
| 746.217   | 81.2058  | 748.4798  | 83.3053  | 698.49    | 13.5575  | 701.437   | 12.62    |
| 758.6379  | 0.2058   | 760.7226  | 2.8504   | 742.9776  | 84.0332  | 743.9791  | 85.2587  |
| 774.9379  | 1.4769   | 774.2306  | 2.6293   | 759.4726  | 4.2354   | 762.1262  | 8.6301   |
| 776.7528  | 9.7721   | 778.9971  | 3.0604   | 769.5933  | 4.1403   | 770.8869  | 5.2394   |
| 804.2747  | 3.1276   | 791.6613  | 49.7457  | 774.605   | 6.5419   | 778.1542  | 7.3209   |
| 888.32    | 2.0295   | 833.0988  | 78.3045  | 802.634   | 1.7181   | 795.3873  | 43.0863  |
| 904.8124  | 25.2981  | 890.7303  | 1.7283   | 883.2496  | 0.3626   | 839.8419  | 88.7313  |
| 918.1497  | 29.7463  | 904.0498  | 49.0022  | 899.1949  | 20.2032  | 886.1894  | 0.5805   |
| 922.1427  | 58.8266  | 917.1546  | 2.3516   | 920.0494  | 21.3983  | 898.9247  | 21.6711  |
| 950.6582  | 6.8588   | 922.6392  | 75.5422  | 920.7074  | 15.0564  | 920.1995  | 1.8081   |
| 961.3417  | 44.1777  | 939.1686  | 12.2328  | 961.3886  | 29.5805  | 925.247   | 2.3051   |
| 967.2793  | 29.2403  | 965.9269  | 48.6379  | 968.5972  | 234.868  | 962.6128  | 1.6051   |
| 986.2025  | 89.2629  | 969.1393  | 48.3889  | 975.0446  | 10.1866  | 968.5242  | 275.4619 |
| 1014.401  | 43.1034  | 1000.1445 | 98.643   | 987.3595  | 95.7077  | 974.9656  | 26.8001  |
| 1024.6594 | 93.8827  | 1024.3538 | 97.8716  | 1027.49   | 75.7607  | 1003.5774 | 70.5938  |
| 1053.1595 | 63.4071  | 1041.2905 | 70.0524  | 1041.2276 | 13.1488  | 1042.9212 | 35.6656  |
| 1054.1614 | 1.8018   | 1051.0263 | 156.3956 | 1052.6172 | 24.2284  | 1046.7107 | 37.5108  |
| 1063.2631 | 4.825    | 1057.0042 | 8.161    | 1054.7065 | 2.1739   | 1051.9292 | 37.6266  |
| 1072.3795 | 22.3116  | 1062.2936 | 14.0916  | 1059.7115 | 70.8879  | 1056.6029 | 161.9838 |
| 1092.4203 | 6.451    | 1083.2808 | 40.3176  | 1071.5171 | 46.6968  | 1057.647  | 12.6454  |
| 1142.6155 | 128.6592 | 1092.3211 | 33.5676  | 1107.0523 | 37.0297  | 1078.5259 | 62.6373  |
| 1147.7305 | 243.7763 | 1143.7779 | 31.3348  | 1150.3327 | 64.9879  | 1106.7653 | 55.613   |
| 1188.5759 | 74.2579  | 1148.8052 | 602.6121 | 1177.9675 | 112.146  | 1151.1638 | 75.409   |
| 1201.2832 | 83.3902  | 1195.2566 | 216.8548 | 1198.7126 | 204.0855 | 1179.6571 | 165.9928 |
| 1214.6423 | 358.7143 | 1207.4584 | 14.3404  | 1206.0388 | 65.4278  | 1207.8442 | 13.7078  |
| 1243.6214 | 95.7354  | 1223.4853 | 274.5686 | 1216.6363 | 219.0362 | 1213.4541 | 111.871  |
| 1289.7671 | 167.5888 | 1249.93   | 180.3858 | 1273.1971 | 232.0783 | 1216.042  | 398.0919 |
| 1317.2424 | 30.8396  | 1268.1352 | 130.5681 | 1294.0709 | 166.5074 | 1262.4743 | 205.5438 |
| 1324.2006 | 88.5842  | 1323.8783 | 59.0003  | 1312.3569 | 58.4949  | 1276.2891 | 189.7643 |
| 1351.2932 | 108.1529 | 1332.1388 | 0.3203   | 1322.7238 | 165.2538 | 1315.8471 | 58.4398  |
| 1371.2773 | 19.9322  | 1360.5353 | 143.4564 | 1354.1753 | 18.3829  | 1337.6255 | 93.9221  |
| 1391.2807 | 126.7119 | 1376.3857 | 16.5321  | 1372.0199 | 37.2393  | 1357.2029 | 12.0195  |
| 1402.1303 | 28.6915  | 1392.4977 | 206.9807 | 1386.7593 | 29.0533  | 1380.0258 | 60.4457  |
| 1409.4445 | 7.2137   | 1404.021  | 29.6811  | 1405.2199 | 108.5636 | 1390.0239 | 76.7781  |
| 1411.4963 | 34.0322  | 1411.9363 | 51.3229  | 1408.4872 | 48.5181  | 1402.9291 | 80.1814  |
| 1415.5925 | 20.0962  | 1412.9354 | 76.6479  | 1411.6762 | 0.5137   | 1408.9716 | 64.6603  |
| 1457.4174 | 203.9215 | 1426.3261 | 18.5483  | 1417.0642 | 212.122  | 1414.9605 | 2.9473   |
| 1464.8787 | 21.3011  | 1437.4837 | 44.773   | 1420.7118 | 95.314   | 1420.6026 | 351.9999 |
| 1465.5558 | 17.0812  | 1451.6837 | 16.9555  | 1460.0788 | 17.9458  | 1425.9398 | 88.8914  |
| 1466.3335 | 10.8932  | 1458.9149 | 63.0801  | 1464.4117 | 14.7885  | 1436.2037 | 79.7805  |
| 1473.3893 | 11.1109  | 1463.6842 | 247.8076 | 1466.8189 | 11.691   | 1450.8618 | 18.6712  |
| 1485.1559 | 5.3282   | 1471.5012 | 263.5097 | 1476.7217 | 9.3599   | 1458.9756 | 18.1684  |
| 1513.5925 | 6.9834   | 1479.6504 | 570.6107 | 1482.1344 | 30.9037  | 1475.7851 | 6.0873   |
| 1526.8325 | 810.7104 | 1498.0003 | 444.1149 | 1508.9895 | 54.4579  | 1480.9688 | 13.645   |
| 1552.6771 | 59.2022  | 1512.8321 | 99.6803  | 1514.2641 | 188.6098 | 1505.0103 | 41.3921  |



**Table S6.** Calculated TD-DFT spectra of different protonated species of complex formed by gold(III) and hydrazone derived from pyridoxal and 3-furoylhydrazide (**PL-F3H**)

| Deprotonated complex, [AuCIL] |                     | Monoprotonated complex 1, [AuCl(HL)] <sup>+</sup> |                     | Monoprotonated complex 2, [AuCl(HL)] <sup>+</sup> |                     | <i>Bis</i> -protonated complex, [AuCl(H <sub>2</sub> L)] <sup>2+</sup> |                     |
|-------------------------------|---------------------|---------------------------------------------------|---------------------|---------------------------------------------------|---------------------|------------------------------------------------------------------------|---------------------|
| $\lambda$ , nm                | oscillator strength | $\lambda$ , nm                                    | oscillator strength | $\lambda$ , nm                                    | oscillator strength | $\lambda$ , nm                                                         | oscillator strength |
| 473.47                        | 0                   | 441.18                                            | 0                   | 519.32                                            | 0                   | 450.11                                                                 | 0                   |
| 369.16                        | 0.0016              | 384.27                                            | 0.4225              | 374.6                                             | 0.0819              | 373.72                                                                 | 0.0769              |
| 365.97                        | 0.2165              | 348.59                                            | 0                   | 364.83                                            | 0.0001              | 366.51                                                                 | 0                   |
| 315.86                        | 0.0279              | 329.58                                            | 0.0048              | 349.85                                            | 0.0642              | 359.37                                                                 | 0.1719              |
| 315.06                        | 0.0032              | 325.84                                            | 0.0669              | 333.88                                            | 0.0001              | 335.86                                                                 | 0.0001              |
| 301.06                        | 0.5301              | 315.8                                             | 0.2582              | 309.19                                            | 0.0008              | 311.17                                                                 | 0.342               |
| 299.53                        | 0.0006              | 305.48                                            | 0.0002              | 306.94                                            | 0.0118              | 300.97                                                                 | 0                   |
| 290.38                        | 0.0056              | 290.93                                            | 0.0479              | 299.46                                            | 0.1767              | 284.5                                                                  | 0.011               |
| 280.02                        | 0.0364              | 283.71                                            | 0.0859              | 287.64                                            | 0.6095              | 276.6                                                                  | 0.0893              |
| 266.41                        | 0.1803              | 270.9                                             | 0.0004              | 276.31                                            | 0.0286              | 260.56                                                                 | 0.0227              |
| 258.68                        | 0.1662              | 259.16                                            | 0.161               | 270.5                                             | 0.002               | 254.92                                                                 | 0.3955              |
| 254.35                        | 0.009               | 249.86                                            | 0.0104              | 263.8                                             | 0.1794              | 252.19                                                                 | 0.0372              |
| 244.12                        | 0.0004              | 243.17                                            | 0.0001              | 251.21                                            | 0.0296              | 244.93                                                                 | 0.1672              |
| 238.56                        | 0.1812              | 236.68                                            | 0.0722              | 233.03                                            | 0.0834              | 236.32                                                                 | 0.0148              |
| 230.8                         | 0.1195              | 233.56                                            | 0.438               | 230.71                                            | 0.1179              | 231.46                                                                 | 0.1077              |
| 226.15                        | 0.0404              | 231.23                                            | 0.0103              | 229.27                                            | 0.1069              | 229.24                                                                 | 0.0685              |
| 225.74                        | 0.0571              | 227.48                                            | 0.0562              | 220.24                                            | 0.1539              | 224.62                                                                 | 0.1822              |
| 217.62                        | 0.0223              | 223.83                                            | 0.1038              | 218.55                                            | 0.0052              | 219.1                                                                  | 0.0354              |
| 214.34                        | 0.0081              | 219.66                                            | 0.0527              | 217.18                                            | 0.0892              | 218.84                                                                 | 0.0039              |
| 213.29                        | 0.3443              | 217.8                                             | 0.0337              | 216.15                                            | 0.184               | 216.82                                                                 | 0.0628              |
| 209.04                        | 0.1121              | 215.46                                            | 0.0616              | 210.97                                            | 0.0684              | 210.19                                                                 | 0.0457              |
| 207.64                        | 0.0587              | 210.38                                            | 0.1261              | 210.03                                            | 0.0022              | 207.96                                                                 | 0.1009              |
| 207.25                        | 0.1007              | 207.95                                            | 0.0867              | 209.55                                            | 0.0283              | 207.26                                                                 | 0.301               |
| 206.88                        | 0.0112              | 207.46                                            | 0.1227              | 207.86                                            | 0.1247              | 203.71                                                                 | 0.1943              |
| 205.44                        | 0.0198              | 204.59                                            | 0.032               | 203.62                                            | 0.0033              | 195.64                                                                 | 0.0063              |
| 203.56                        | 0.0159              | 198.58                                            | 0.0603              | 201.05                                            | 0.0873              | 195.09                                                                 | 0.0016              |
| 202.35                        | 0.0756              | 197.61                                            | 0.0346              | 200.79                                            | 0.046               | 194.06                                                                 | 0.0033              |
| 198.54                        | 0.1019              | 194.39                                            | 0.2663              | 197.99                                            | 0.1186              | 192.86                                                                 | 0.0365              |
| 194.91                        | 0.0033              | 193.02                                            | 0.0647              | 194.76                                            | 0.1343              | 189.83                                                                 | 0.0039              |
| 193.66                        | 0.0746              | 189.29                                            | 0.0088              | 189.3                                             | 0.0825              | 187.72                                                                 | 0.1788              |



**Table S7.** Optimized geometry (*xyz*-coordinates) of different protonated species of complex formed by gold(III) and hydrazone derived from pyridoxal and thiophene-2-hydrazide (**PL-T2H**)

Deprotonated complex, [AuClL]

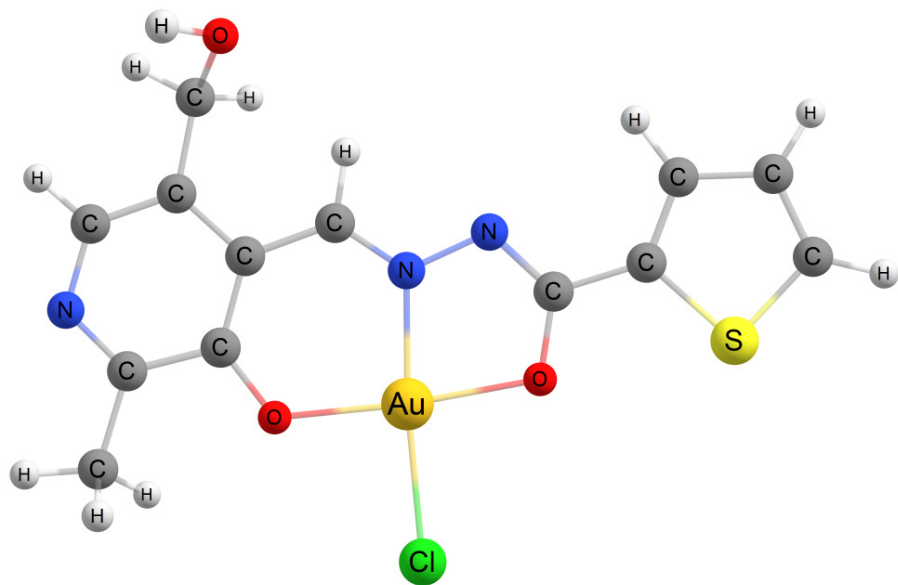

|   |              |              |              |
|---|--------------|--------------|--------------|
| 6 | -4.130776000 | -0.547229000 | -0.034734000 |
| 6 | -2.739875000 | -0.204656000 | -0.044022000 |
| 6 | -2.384500000 | 1.163080000  | -0.116197000 |
| 6 | -3.435973000 | 2.121627000  | -0.197891000 |
| 6 | -4.732953000 | 1.669184000  | -0.183792000 |
| 7 | -5.072847000 | 0.369848000  | -0.102409000 |
| 1 | -5.552971000 | 2.374248000  | -0.241982000 |
| 6 | -4.532405000 | -1.988380000 | 0.056132000  |
| 1 | -4.136277000 | -2.449926000 | 0.962317000  |
| 1 | -4.135961000 | -2.560158000 | -0.784761000 |
| 1 | -5.616706000 | -2.060868000 | 0.060350000  |
| 8 | -1.926794000 | -1.245086000 | 0.018391000  |
| 6 | -1.033102000 | 1.652054000  | -0.113503000 |
| 1 | -0.867467000 | 2.720464000  | -0.125021000 |
| 6 | -3.181665000 | 3.605623000  | -0.312160000 |
| 1 | -4.138084000 | 4.114655000  | -0.445899000 |
| 1 | -2.571657000 | 3.828053000  | -1.188295000 |
| 8 | -2.466092000 | 4.155789000  | 0.797920000  |
| 7 | 0.036138000  | 0.928683000  | -0.071018000 |
| 7 | 1.280992000  | 1.498293000  | -0.074445000 |
| 6 | 2.228373000  | 0.600194000  | -0.036894000 |
| 8 | 2.014647000  | -0.704031000 | 0.003347000  |
| 6 | 3.616137000  | 1.023315000  | -0.039195000 |

|    |              |              |              |
|----|--------------|--------------|--------------|
| 6  | 4.116142000  | 2.303333000  | -0.087209000 |
| 6  | 5.527789000  | 2.341109000  | -0.073226000 |
| 1  | 3.482944000  | 3.175631000  | -0.131082000 |
| 1  | 6.106832000  | 3.251353000  | -0.105145000 |
| 16 | 4.900022000  | -0.147784000 | 0.023897000  |
| 6  | 6.086931000  | 1.093311000  | -0.014804000 |
| 79 | 0.042786000  | -1.058871000 | 0.008995000  |
| 17 | 0.258426000  | -3.379083000 | 0.097962000  |
| 1  | 7.131868000  | 0.833119000  | 0.007698000  |
| 1  | -2.985021000 | 4.006665000  | 1.596295000  |

Monoprotonated complex,  $[\text{AuCl}(\text{HL})]^+$  1, proton is bound with heterocyclic nitrogen of pyridoxal

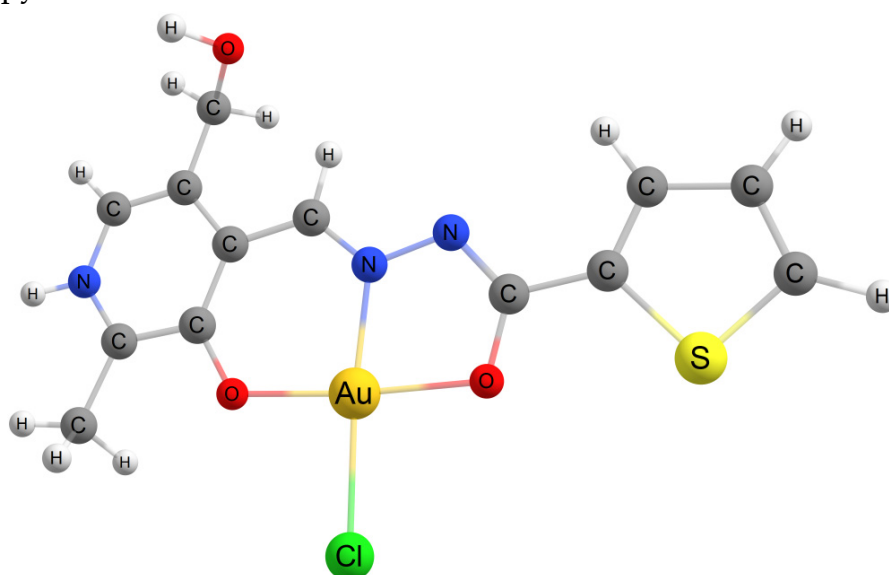

|   |              |              |              |
|---|--------------|--------------|--------------|
| 6 | -4.083246000 | -0.578593000 | -0.045918000 |
| 6 | -2.709594000 | -0.215168000 | -0.039778000 |
| 6 | -2.364271000 | 1.160600000  | -0.105137000 |
| 6 | -3.406021000 | 2.127668000  | -0.194412000 |
| 6 | -4.707156000 | 1.709773000  | -0.198086000 |
| 7 | -4.991883000 | 0.390673000  | -0.123703000 |
| 1 | -5.549300000 | 2.378364000  | -0.258470000 |
| 6 | -4.520492000 | -1.996305000 | 0.031512000  |
| 1 | -4.142928000 | -2.454102000 | 0.946128000  |
| 1 | -4.103801000 | -2.561306000 | -0.802571000 |
| 1 | -5.604384000 | -2.076903000 | 0.012161000  |
| 8 | -1.904440000 | -1.249783000 | 0.028245000  |
| 6 | -1.009375000 | 1.656072000  | -0.096392000 |
| 1 | -0.846197000 | 2.723924000  | -0.101628000 |
| 6 | -3.140329000 | 3.615931000  | -0.300021000 |
| 1 | -4.091824000 | 4.134857000  | -0.421279000 |
| 1 | -2.542788000 | 3.824825000  | -1.187135000 |
| 8 | -2.405973000 | 4.137497000  | 0.801122000  |

|    |              |              |              |
|----|--------------|--------------|--------------|
| 7  | 0.057721000  | 0.929385000  | -0.058351000 |
| 7  | 1.291749000  | 1.493779000  | -0.062440000 |
| 6  | 2.245638000  | 0.592316000  | -0.031598000 |
| 8  | 2.027640000  | -0.708933000 | 0.007076000  |
| 6  | 3.626304000  | 1.016990000  | -0.041722000 |
| 6  | 4.115895000  | 2.303415000  | -0.094078000 |
| 6  | 5.524800000  | 2.351166000  | -0.090574000 |
| 1  | 3.475107000  | 3.170231000  | -0.134041000 |
| 1  | 6.097930000  | 3.264723000  | -0.127311000 |
| 16 | 4.919155000  | -0.145073000 | 0.012290000  |
| 6  | 6.092623000  | 1.105559000  | -0.035707000 |
| 79 | 0.067137000  | -1.063339000 | 0.015850000  |
| 17 | 0.284920000  | -3.373253000 | 0.096960000  |
| 1  | 7.139864000  | 0.853856000  | -0.020864000 |
| 1  | -5.968573000 | 0.118322000  | -0.127049000 |
| 1  | -2.946637000 | 4.069779000  | 1.596350000  |

Monoprotonated complex,  $[\text{AuCl}(\text{HL})]^+$  2, proton is bound with hydrazide nitrogen

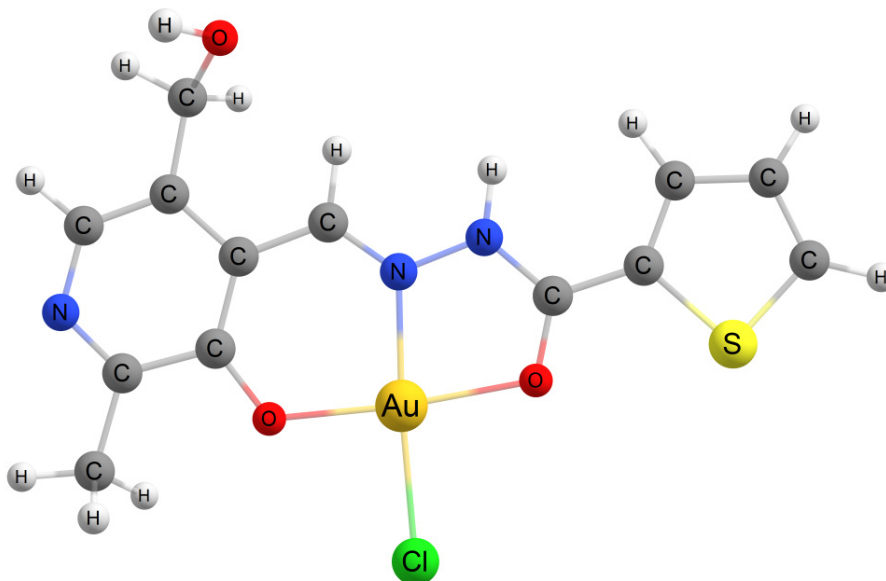

|   |              |              |              |
|---|--------------|--------------|--------------|
| 6 | -4.134981000 | -0.557091000 | -0.042560000 |
| 6 | -2.744176000 | -0.200335000 | -0.037744000 |
| 6 | -2.403588000 | 1.172945000  | -0.095863000 |
| 6 | -3.461321000 | 2.126806000  | -0.174266000 |
| 6 | -4.751865000 | 1.661447000  | -0.169528000 |
| 7 | -5.076316000 | 0.356786000  | -0.104299000 |
| 1 | -5.579932000 | 2.356631000  | -0.223412000 |
| 6 | -4.525715000 | -2.001041000 | 0.029339000  |
| 1 | -4.138509000 | -2.466622000 | 0.937141000  |
| 1 | -4.112653000 | -2.560256000 | -0.811732000 |
| 1 | -5.609127000 | -2.080953000 | 0.017773000  |
| 8 | -1.935086000 | -1.244007000 | 0.027418000  |
| 6 | -1.058740000 | 1.673115000  | -0.082550000 |

|    |              |              |              |
|----|--------------|--------------|--------------|
| 1  | -0.917438000 | 2.747200000  | -0.066496000 |
| 6  | -3.218823000 | 3.613846000  | -0.293634000 |
| 1  | -4.183376000 | 4.120575000  | -0.348454000 |
| 1  | -2.681795000 | 3.839844000  | -1.215619000 |
| 8  | -2.416346000 | 4.157791000  | 0.756591000  |
| 7  | -0.007749000 | 0.927568000  | -0.054863000 |
| 7  | 1.272176000  | 1.430573000  | -0.041896000 |
| 6  | 2.286986000  | 0.551265000  | -0.030613000 |
| 8  | 2.022507000  | -0.705287000 | -0.003048000 |
| 6  | 3.647171000  | 0.991815000  | -0.045854000 |
| 6  | 4.152694000  | 2.274788000  | -0.153725000 |
| 6  | 5.556000000  | 2.304528000  | -0.134698000 |
| 1  | 3.546758000  | 3.162886000  | -0.250569000 |
| 1  | 6.141080000  | 3.207469000  | -0.208085000 |
| 16 | 4.927461000  | -0.182248000 | 0.076587000  |
| 6  | 6.104910000  | 1.051828000  | -0.013653000 |
| 79 | 0.024527000  | -1.066162000 | 0.009155000  |
| 17 | 0.218497000  | -3.358965000 | 0.075325000  |
| 1  | 7.149384000  | 0.790862000  | 0.027517000  |
| 1  | -2.880739000 | 4.036998000  | 1.592651000  |
| 1  | 1.398191000  | 2.434549000  | -0.048075000 |

Bis-protonated complex,  $[\text{AuCl}(\text{H}_2\text{L})]^{2+}$

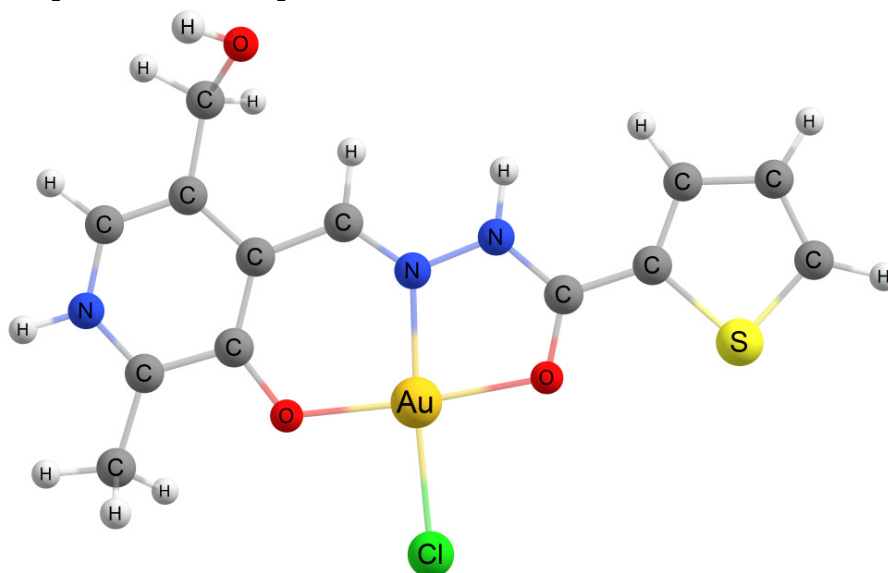

|   |              |              |              |
|---|--------------|--------------|--------------|
| 6 | -3.897832000 | -0.646713000 | -0.035397000 |
| 6 | -2.530256000 | -0.243381000 | -0.036304000 |
| 6 | -2.228321000 | 1.140764000  | -0.096741000 |
| 6 | -3.293346000 | 2.083179000  | -0.175998000 |
| 6 | -4.581270000 | 1.627841000  | -0.170037000 |
| 7 | -4.826106000 | 0.299926000  | -0.099676000 |
| 1 | -5.443296000 | 2.271371000  | -0.218270000 |
| 6 | -4.294122000 | -2.075335000 | 0.035404000  |

|    |              |              |              |
|----|--------------|--------------|--------------|
| 1  | -3.894420000 | -2.528132000 | 0.943072000  |
| 1  | -3.868762000 | -2.620835000 | -0.807340000 |
| 1  | -5.375164000 | -2.185499000 | 0.025018000  |
| 8  | -1.708846000 | -1.266919000 | 0.022527000  |
| 6  | -0.883982000 | 1.674396000  | -0.089328000 |
| 1  | -0.767947000 | 2.750827000  | -0.077098000 |
| 6  | -3.071702000 | 3.579468000  | -0.295571000 |
| 1  | -4.041923000 | 4.075395000  | -0.319169000 |
| 1  | -2.572381000 | 3.800098000  | -1.239102000 |
| 8  | -2.241264000 | 4.115622000  | 0.725410000  |
| 7  | 0.175121000  | 0.947659000  | -0.060492000 |
| 7  | 1.440874000  | 1.467433000  | -0.058142000 |
| 6  | 2.468002000  | 0.594452000  | -0.031337000 |
| 8  | 2.225879000  | -0.664627000 | 0.002015000  |
| 6  | 3.810282000  | 1.063942000  | -0.039306000 |
| 6  | 4.383686000  | 2.315303000  | -0.072932000 |
| 6  | 5.776648000  | 2.109550000  | -0.062145000 |
| 1  | 3.876880000  | 3.264772000  | -0.101079000 |
| 1  | 6.546025000  | 2.860275000  | -0.080842000 |
| 8  | 4.785435000  | 0.106274000  | -0.008746000 |
| 6  | 5.961227000  | 0.755496000  | -0.023092000 |
| 79 | 0.248315000  | -1.050517000 | 0.011717000  |
| 17 | 0.487839000  | -3.328083000 | 0.101256000  |
| 1  | 6.841523000  | 0.137987000  | -0.002639000 |
| 1  | -2.703879000 | 4.064756000  | 1.569827000  |
| 1  | 1.556568000  | 2.473230000  | -0.089710000 |
| 1  | -5.796295000 | 0.002338000  | -0.094415000 |

**Table S8.** Calculated IR spectra of different protonated species of complex formed by gold(III) and hydrazone derived from pyridoxal and thiophene-2-hydrazide (**PL-T2H**)

| Deprotonated complex,<br>[AuCIL] |                       | Monoprotonated<br>complex 1,<br>[AuCl(HL)] <sup>+</sup> |                       | Monoprotonated<br>complex 2, [AuCl(HL)] <sup>+</sup> |                       | <i>Bis</i> -protonated<br>complex, [AuCl(H <sub>2</sub> L)] <sup>2+</sup> |                       |
|----------------------------------|-----------------------|---------------------------------------------------------|-----------------------|------------------------------------------------------|-----------------------|---------------------------------------------------------------------------|-----------------------|
| Frequency,<br>cm <sup>-1</sup>   | Relative<br>intensity | Frequency,<br>cm <sup>-1</sup>                          | Relative<br>intensity | Frequency,<br>cm <sup>-1</sup>                       | Relative<br>intensity | Frequency,<br>cm <sup>-1</sup>                                            | Relative<br>intensity |
| 29.8837                          | 0.148                 | 30.692                                                  | 8.4732                | 28.2486                                              | 0.1554                | 30.0715                                                                   | 7.5698                |
| 31.788                           | 0.4054                | 34.4848                                                 | 0.1286                | 36.1288                                              | 2.1387                | 38.7229                                                                   | 2.8751                |
| 41.9649                          | 0.3355                | 45.2688                                                 | 0.0559                | 49.6232                                              | 3.0852                | 51.172                                                                    | 1.7395                |
| 62.4947                          | 1.5172                | 63.0825                                                 | 4.3309                | 63.5834                                              | 1.6821                | 65.0298                                                                   | 2.963                 |
| 76.8139                          | 1.9985                | 79.7675                                                 | 4.6357                | 72.6222                                              | 2.7202                | 74.9681                                                                   | 3.0577                |
| 94.2964                          | 1.304                 | 96.6101                                                 | 0.0326                | 92.7141                                              | 2.387                 | 96.8891                                                                   | 0.0453                |
| 103.95                           | 3.9864                | 103.2956                                                | 1.62                  | 106.3702                                             | 0.4303                | 106.2142                                                                  | 0.5512                |
| 109.6324                         | 2.0499                | 110.3369                                                | 4.4567                | 113.6098                                             | 5.0087                | 114.2052                                                                  | 5.4974                |
| 118.0949                         | 0.7694                | 121.4484                                                | 0.2346                | 122.0362                                             | 6.0711                | 123.5069                                                                  | 1.9473                |
| 154.1496                         | 0.1113                | 135.4712                                                | 0.6431                | 154.0779                                             | 0.6348                | 142.4672                                                                  | 1.1203                |
| 170.543                          | 2.3721                | 170.8415                                                | 1.2277                | 168.7981                                             | 5.9381                | 170.6941                                                                  | 4.6959                |
| 176.1181                         | 8.9257                | 176.8429                                                | 3.7691                | 174.6297                                             | 3.2928                | 176.6616                                                                  | 0.8266                |
| 187.5579                         | 0.9479                | 184.7869                                                | 3.9257                | 183.7979                                             | 2.9039                | 185.4531                                                                  | 5.7646                |
| 200.3948                         | 0.7494                | 203.6809                                                | 1.6216                | 194.9805                                             | 1.5364                | 198.1121                                                                  | 3.8017                |
| 211.6838                         | 0.5578                | 210.2119                                                | 2.1649                | 209.834                                              | 3.021                 | 211.0023                                                                  | 4.722                 |
| 237.1238                         | 8.1004                | 238.5311                                                | 5.6813                | 232.2619                                             | 12.7123               | 234.9892                                                                  | 8.6584                |
| 248.1629                         | 4.2028                | 248.5627                                                | 2.3741                | 242.4302                                             | 5.5729                | 245.6015                                                                  | 4.9455                |
| 273.9874                         | 1.1464                | 269.3317                                                | 4.404                 | 271.0934                                             | 0.6083                | 270.3379                                                                  | 5.3729                |
| 307.734                          | 133.5772              | 301.1291                                                | 128.315               | 314.9013                                             | 85.8626               | 314.7699                                                                  | 73.2165               |
| 324.7554                         | 61.6873               | 332.4575                                                | 64.1073               | 339.9216                                             | 10.5802               | 344.6237                                                                  | 15.7923               |
| 343.0309                         | 15.4315               | 340.868                                                 | 19.8397               | 346.2592                                             | 52.2417               | 353.3799                                                                  | 47.9608               |
| 360.8568                         | 89.7954               | 358.6784                                                | 69.2997               | 363.8673                                             | 130.2904              | 364.8384                                                                  | 117.3679              |
| 389.973                          | 8.0139                | 390.7519                                                | 5.1714                | 384.1856                                             | 8.2609                | 387.251                                                                   | 5.4219                |
| 401.8464                         | 9.7498                | 397.9503                                                | 18.5534               | 386.1539                                             | 0.4167                | 394.5168                                                                  | 10.8419               |
| 433.034                          | 0.4111                | 442.5301                                                | 25.644                | 397.6753                                             | 8.6486                | 410.1176                                                                  | 14.2982               |
| 447.5062                         | 35.9173               | 450.9673                                                | 0.4456                | 446.3545                                             | 40.3625               | 441.4772                                                                  | 28.3843               |
| 480.6081                         | 3.7728                | 482.5542                                                | 12.1184               | 467.2698                                             | 0.6604                | 467.3335                                                                  | 0.8854                |
| 485.4465                         | 37.0272               | 485.9611                                                | 18.4072               | 480.7173                                             | 47.8908               | 480.7699                                                                  | 39.3905               |
| 530.5975                         | 13.446                | 528.0272                                                | 15.8096               | 509.8636                                             | 111.7359              | 528.5982                                                                  | 18.78                 |
| 568.8135                         | 3.8309                | 567.6248                                                | 5.8518                | 528.6617                                             | 22.1347               | 535.6759                                                                  | 104.3172              |
| 578.1434                         | 16.7604               | 568.3399                                                | 1.6131                | 561.3435                                             | 3.7942                | 562.1675                                                                  | 8.04                  |
| 581.4315                         | 7.2808                | 579.4739                                                | 1.2756                | 572.1619                                             | 1.5261                | 566.8739                                                                  | 5.0512                |
| 586.1709                         | 40.0578               | 585.2149                                                | 10.102                | 573.4403                                             | 44.7049               | 570.9836                                                                  | 22.0956               |
| 630.687                          | 9.1336                | 630.4244                                                | 1.2446                | 577.2551                                             | 44.2795               | 578.6781                                                                  | 14.2842               |
| 655.6949                         | 30.0123               | 658.0859                                                | 20.4455               | 622.7621                                             | 24.9715               | 621.9919                                                                  | 5.7339                |
| 681.6699                         | 83.8967               | 683.3729                                                | 69.0291               | 649.6277                                             | 28.0387               | 654.5529                                                                  | 18.621                |
| 693.1166                         | 13.5721               | 698.6055                                                | 23.2284               | 679.478                                              | 60.3504               | 681.2007                                                                  | 53.2397               |
| 726.4985                         | 30.6503               | 730.055                                                 | 44.3776               | 693.6096                                             | 35.7177               | 699.0102                                                                  | 48.6797               |
| 734.8441                         | 100.2056              | 741.7535                                                | 86.6092               | 725.6115                                             | 36.025                | 726.1828                                                                  | 37.8092               |
| 752.9931                         | 16.0786               | 754.0665                                                | 32.364                | 753.3097                                             | 19.9351               | 754.5425                                                                  | 27.5471               |

|           |          |           |          |           |           |           |          |
|-----------|----------|-----------|----------|-----------|-----------|-----------|----------|
| 763.3861  | 10.5873  | 763.6513  | 10.9087  | 756.2226  | 81.2066   | 761.3953  | 81.5277  |
| 776.0357  | 8.0741   | 775.4305  | 2.7816   | 762.2569  | 45.6077   | 762.1847  | 47.6493  |
| 804.1126  | 4.3434   | 791.3629  | 53.8008  | 774.2316  | 6.7298    | 778.0302  | 14.3477  |
| 859.8662  | 82.0335  | 835.7042  | 81.3076  | 802.7928  | 3.036     | 796.0587  | 47.7854  |
| 879.7472  | 5.5895   | 861.9651  | 100.9907 | 865.9176  | 72.6625   | 844.1807  | 92.2915  |
| 903.8995  | 1.4935   | 884.105   | 4.043    | 882.9575  | 1.7191    | 868.5179  | 59.5065  |
| 918.404   | 29.6026  | 903.6501  | 2.0611   | 892.7407  | 12.9378   | 886.7066  | 1.4954   |
| 950.1984  | 0.3035   | 917.3229  | 1.8323   | 919.5571  | 29.1908   | 892.2819  | 25.4867  |
| 951.4405  | 7.3021   | 938.9485  | 11.8028  | 958.1559  | 0.2089    | 927.2593  | 2.8259   |
| 961.6988  | 17.5544  | 954.6384  | 0.6528   | 961.0693  | 4.1403    | 961.7419  | 0.1778   |
| 983.5856  | 65.7731  | 965.303   | 19.2868  | 973.9907  | 29.1474   | 963.2284  | 2.9001   |
| 1011.2946 | 116.3423 | 996.0897  | 68.557   | 985.3689  | 98.1152   | 976.9599  | 21.1746  |
| 1024.0904 | 111.4652 | 1019.6687 | 231.7825 | 1027.1503 | 86.3685   | 998.8159  | 64.1094  |
| 1054.0346 | 1.8422   | 1042.0355 | 117.8588 | 1038.525  | 26.9141   | 1041.0837 | 10.8987  |
| 1063.4049 | 15.2483  | 1057.6359 | 8.4848   | 1054.8218 | 1.7871    | 1046.5913 | 122.2294 |
| 1072.7545 | 6.4452   | 1065.0066 | 21.1154  | 1067.5814 | 32.6072   | 1058.3672 | 8.5891   |
| 1082.3359 | 28.9397  | 1081.1245 | 22.6422  | 1082.4912 | 16.6049   | 1070.6014 | 65.1019  |
| 1103.8971 | 3.4376   | 1085.8754 | 20.7974  | 1103.546  | 33.9174   | 1087.1704 | 45.6035  |
| 1146.3562 | 257.9673 | 1105.0964 | 2.9397   | 1115.587  | 172.3916  | 1104.9328 | 23.5683  |
| 1200.2018 | 71.5548  | 1156.7587 | 640.7275 | 1182.9744 | 163.3114  | 1117.513  | 247.7495 |
| 1212.6673 | 244.392  | 1206.6277 | 13.6793  | 1198.6379 | 259.6677  | 1186.0726 | 297.4851 |
| 1249.3596 | 56.4674  | 1222.421  | 216.3851 | 1205.842  | 69.657    | 1208.9425 | 17.6664  |
| 1289.5274 | 236.1169 | 1250.02   | 74.9166  | 1266.4388 | 12.8009   | 1214.8396 | 255.966  |
| 1310.3901 | 87.6522  | 1268.1138 | 213.7749 | 1292.8878 | 232.7294  | 1263.6085 | 163.2789 |
| 1323.9173 | 109.902  | 1317.3968 | 49.1085  | 1311.5684 | 62.8861   | 1266.7091 | 27.9993  |
| 1327.9397 | 209.5316 | 1328.9771 | 93.7417  | 1322.3042 | 198.9418  | 1318.3871 | 73.0285  |
| 1369.8928 | 31.1757  | 1344.1122 | 261.1865 | 1342.861  | 206.5439  | 1337.4103 | 112.1364 |
| 1391.0945 | 83.9637  | 1375.2053 | 19.5726  | 1371.8245 | 25.246    | 1346.9529 | 189.5871 |
| 1391.8454 | 84.1177  | 1389.8888 | 367.556  | 1375.5779 | 237.6366  | 1375.3798 | 122.3231 |
| 1407.8502 | 110.0157 | 1395.8574 | 44.4446  | 1391.2166 | 54.1857   | 1382.1101 | 242.6636 |
| 1411.295  | 68.8782  | 1411.4918 | 154.6119 | 1407.1117 | 110.7424  | 1390.849  | 261.8725 |
| 1421.0199 | 101.9135 | 1416.2171 | 225.6127 | 1411.4041 | 25.9512   | 1406.3366 | 63.2326  |
| 1451.8468 | 240.9234 | 1428.7158 | 9.1044   | 1415.8339 | 241.9733  | 1416.2893 | 294.4319 |
| 1464.8323 | 19.76    | 1438.0784 | 122.6834 | 1443.6746 | 443.0404  | 1421.3531 | 228.6371 |
| 1466.3164 | 11.1147  | 1447.1738 | 507.99   | 1464.1394 | 14.5438   | 1435.5669 | 41.7005  |
| 1484.8737 | 5.1096   | 1451.0911 | 17.5178  | 1466.5996 | 11.7892   | 1443.4063 | 479.0853 |
| 1512.6865 | 6.346    | 1477.4542 | 792.4226 | 1480.4718 | 316.6827  | 1450.1689 | 18.4062  |
| 1533.7265 | 974.2655 | 1496.7479 | 560.5992 | 1483.4352 | 121.1402  | 1477.0367 | 158.4127 |
| 1550.0727 | 112.297  | 1510.5649 | 122.785  | 1509.4949 | 14.8972   | 1488.1274 | 166.1712 |
| 1564.1064 | 116.8199 | 1526.4903 | 595.1237 | 1536.9148 | 81.2112   | 1506.3467 | 80.4309  |
| 1601.0527 | 58.544   | 1556.5057 | 232.2599 | 1559.7868 | 217.1718  | 1516.8393 | 82.8286  |
| 1649.6621 | 162.1484 | 1613.2509 | 22.7859  | 1595.9557 | 1330.5802 | 1547.6501 | 280.8747 |
| 3035.1108 | 36.0088  | 1646.9866 | 21.2556  | 1600.3703 | 34.915    | 1596.1371 | 1582.491 |
| 3035.4383 | 61.4659  | 1668.4354 | 62.8985  | 1667.4677 | 56.5898   | 1617.4528 | 6.6677   |
| 3077.0495 | 28.2459  | 3048.4547 | 57.4313  | 3037.8994 | 15.4063   | 1661.3193 | 40.5019  |
| 3080.8219 | 17.4629  | 3048.674  | 1.6567   | 3041.8429 | 61.3311   | 1682.9282 | 14.9284  |





**Table S9.** Calculated TD-DFT spectra of different protonated species of complex formed by gold(III) and hydrazone derived from pyridoxal and thiophene-2-hydrazide (**PL-T2H**)

| Deprotonated complex, [AuClL] |                     | Monoprotonated complex 1, [AuCl(HL)] <sup>+</sup> |                     | Monoprotonated complex 2, [AuCl(HL)] <sup>+</sup> |                     | <i>Bis</i> -protonated complex, [AuCl(H <sub>2</sub> L)] <sup>2+</sup> |                     |
|-------------------------------|---------------------|---------------------------------------------------|---------------------|---------------------------------------------------|---------------------|------------------------------------------------------------------------|---------------------|
| $\lambda$ , nm                | oscillator strength | $\lambda$ , nm                                    | oscillator strength | $\lambda$ , nm                                    | oscillator strength | $\lambda$ , nm                                                         | oscillator strength |
| 477.63                        | 0                   | 444.48                                            | 0.0002              | 521.72                                            | 0.0001              | 451.07                                                                 | 0.0001              |
| 371.3                         | 0.2387              | 389.88                                            | 0.5408              | 377.64                                            | 0.1172              | 375.33                                                                 | 0.1118              |
| 370.64                        | 0.0724              | 348.32                                            | 0.0001              | 366.24                                            | 0.0003              | 364.77                                                                 | 0.0003              |
| 317.13                        | 0.0292              | 327.59                                            | 0.0805              | 351.66                                            | 0.0801              | 361.32                                                                 | 0.2194              |
| 310.25                        | 0.0022              | 324.87                                            | 0.0007              | 322.44                                            | 0.0008              | 315.19                                                                 | 0.0025              |
| 308.01                        | 0.5862              | 315.6                                             | 0.342               | 308.89                                            | 0.0952              | 307.83                                                                 | 0.6715              |
| 291.64                        | 0.0033              | 291.77                                            | 0.0001              | 304.3                                             | 0.43                | 301.26                                                                 | 0.0003              |
| 290.07                        | 0.0002              | 284.09                                            | 0.0434              | 301.55                                            | 0.0094              | 285.08                                                                 | 0.0053              |
| 279.85                        | 0.0395              | 277.83                                            | 0.0331              | 292.24                                            | 0.5032              | 284.82                                                                 | 0.0455              |
| 266.41                        | 0.376               | 269.89                                            | 0.0012              | 278.07                                            | 0.0122              | 276.74                                                                 | 0.0005              |
| 258.24                        | 0.0673              | 265.36                                            | 0.015               | 270.4                                             | 0.0944              | 270.47                                                                 | 0.1391              |
| 254.36                        | 0.0003              | 264.58                                            | 0.1048              | 266.33                                            | 0.001               | 260.9                                                                  | 0.0613              |
| 248.94                        | 0.1509              | 259.66                                            | 0.1647              | 263.39                                            | 0.034               | 253.11                                                                 | 0.1385              |
| 247.89                        | 0.0016              | 250.01                                            | 0.0092              | 259.16                                            | 0.1201              | 245.86                                                                 | 0.1481              |
| 244.4                         | 0.0015              | 244.48                                            | 0.2417              | 251.67                                            | 0.0309              | 242.15                                                                 | 0.0085              |
| 237.3                         | 0.0238              | 236.37                                            | 0.0092              | 239.43                                            | 0.0224              | 236.9                                                                  | 0.0073              |
| 232.74                        | 0.0138              | 230.92                                            | 0.0898              | 233.09                                            | 0.0896              | 229.18                                                                 | 0.0474              |
| 228.01                        | 0.0649              | 230.17                                            | 0.043               | 223.72                                            | 0.0321              | 227.56                                                                 | 0.0017              |
| 223.2                         | 0.1162              | 228.18                                            | 0.0032              | 220.68                                            | 0.0149              | 222.43                                                                 | 0.0431              |
| 217.2                         | 0.0402              | 221.35                                            | 0.0309              | 218.75                                            | 0.0047              | 219.82                                                                 | 0.0548              |
| 214.82                        | 0.0305              | 218.35                                            | 0.0214              | 213.97                                            | 0.1198              | 218.4                                                                  | 0.0186              |
| 211.44                        | 0.0089              | 215.92                                            | 0.0433              | 212.27                                            | 0.1159              | 213.04                                                                 | 0.1327              |
| 209.76                        | 0.0541              | 211.13                                            | 0.1441              | 210.56                                            | 0.0039              | 210.07                                                                 | 0.2723              |
| 208.01                        | 0.2139              | 209.15                                            | 0.066               | 209.31                                            | 0.0598              | 208.38                                                                 | 0.0377              |
| 207.64                        | 0.0162              | 207.96                                            | 0.1865              | 206.59                                            | 0.0806              | 204.66                                                                 | 0.2196              |
| 207.25                        | 0.009               | 206.96                                            | 0.021               | 205.53                                            | 0.0039              | 198.32                                                                 | 0.0014              |
| 204.6                         | 0.0176              | 200.02                                            | 0.0186              | 204.52                                            | 0.0034              | 195.86                                                                 | 0.0144              |
| 202.18                        | 0.0733              | 198.18                                            | 0.0804              | 202.22                                            | 0.0965              | 195.28                                                                 | 0.0344              |
| 200.17                        | 0.0791              | 195.54                                            | 0.1648              | 199.57                                            | 0.1724              | 193.67                                                                 | 0.1023              |
| 196.02                        | 0.0019              | 193.65                                            | 0.152               | 197.82                                            | 0.031               | 192.4                                                                  | 0.1014              |

**Table S10.** Optimized geometry (*xyz*-coordinates) of different protonated species of complex formed by gold(III) and hydrazone derived from pyridoxal and thiophene-3-hydrazide (**PL-T3H**)

Deprotonated complex, [AuClL]

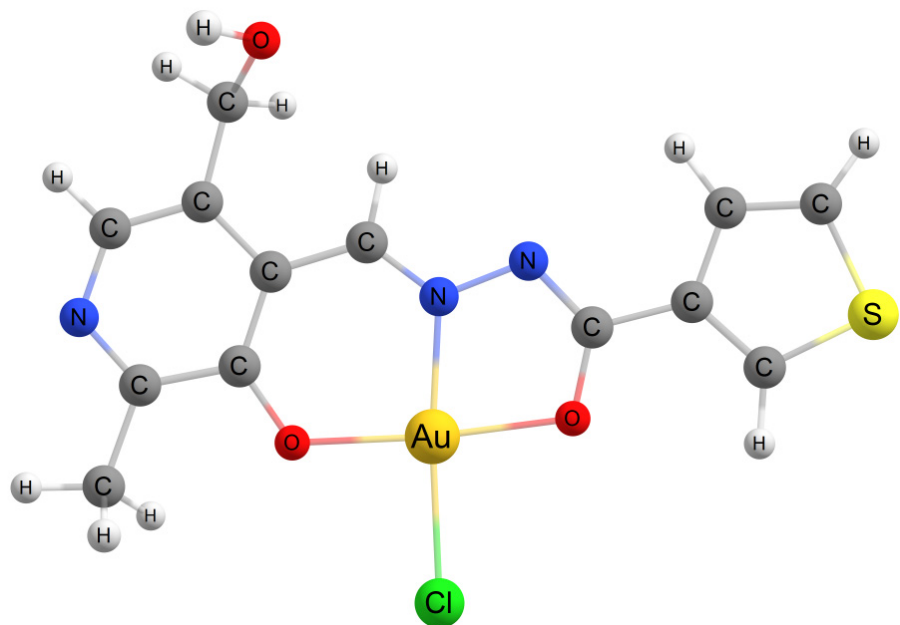

|   |              |              |              |
|---|--------------|--------------|--------------|
| 6 | -4.190795000 | -0.390403000 | -0.028338000 |
| 6 | -2.783832000 | -0.118908000 | -0.042559000 |
| 6 | -2.360772000 | 1.229604000  | -0.116265000 |
| 6 | -3.362693000 | 2.239939000  | -0.198933000 |
| 6 | -4.680618000 | 1.853528000  | -0.181861000 |
| 7 | -5.085265000 | 0.572875000  | -0.095829000 |
| 1 | -5.464360000 | 2.598609000  | -0.241121000 |
| 6 | -4.664093000 | -1.809316000 | 0.067352000  |
| 1 | -4.286839000 | -2.288585000 | 0.972396000  |
| 1 | -4.301284000 | -2.401721000 | -0.774441000 |
| 1 | -5.750607000 | -1.827537000 | 0.077057000  |
| 8 | -2.023986000 | -1.198187000 | 0.015449000  |
| 6 | -0.986708000 | 1.650140000  | -0.113340000 |
| 1 | -0.767793000 | 2.708964000  | -0.127162000 |
| 6 | -3.033486000 | 3.708785000  | -0.317957000 |
| 1 | -3.962810000 | 4.265306000  | -0.453262000 |
| 1 | -2.413097000 | 3.896779000  | -1.194879000 |
| 8 | -2.290383000 | 4.225588000  | 0.790065000  |
| 7 | 0.044512000  | 0.874329000  | -0.067395000 |
| 7 | 1.318078000  | 1.382023000  | -0.069966000 |
| 6 | 2.219578000  | 0.439141000  | -0.031966000 |
| 8 | 1.939439000  | -0.851377000 | 0.006537000  |

|    |              |              |              |
|----|--------------|--------------|--------------|
| 6  | 3.634470000  | 0.801845000  | -0.032090000 |
| 6  | 4.125981000  | 2.144938000  | -0.090893000 |
| 6  | 5.482346000  | 2.203785000  | -0.077393000 |
| 1  | 3.485487000  | 3.010781000  | -0.141353000 |
| 1  | 6.114031000  | 3.074807000  | -0.112506000 |
| 6  | 4.646163000  | -0.124472000 | 0.024892000  |
| 1  | 4.555481000  | -1.195162000 | 0.076163000  |
| 16 | 6.186454000  | 0.624337000  | 0.007877000  |
| 79 | -0.045704000 | -1.109766000 | 0.008708000  |
| 17 | 0.060005000  | -3.438290000 | 0.087538000  |
| 1  | -2.816033000 | 4.106354000  | 1.589054000  |

Monoprotonated complex,  $[\text{AuCl}(\text{HL})]^+$  1, proton is bound with heterocyclic nitrogen of pyridoxal

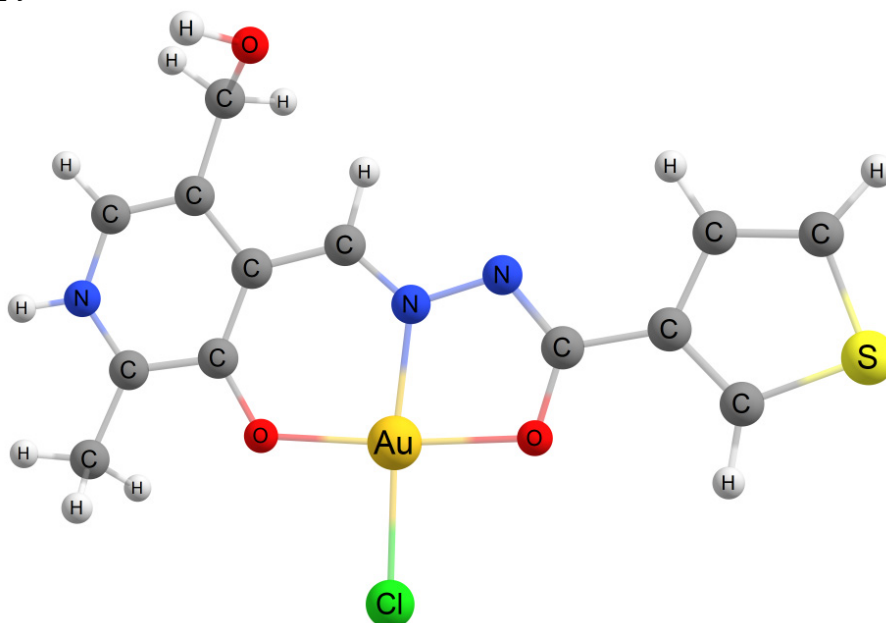

|   |              |              |              |
|---|--------------|--------------|--------------|
| 6 | -4.144649000 | -0.429973000 | -0.036582000 |
| 6 | -2.753765000 | -0.134627000 | -0.035393000 |
| 6 | -2.343109000 | 1.222986000  | -0.103717000 |
| 6 | -3.335766000 | 2.239645000  | -0.198707000 |
| 6 | -4.655654000 | 1.885910000  | -0.201512000 |
| 7 | -5.003892000 | 0.582279000  | -0.119062000 |
| 1 | -5.464748000 | 2.593736000  | -0.268002000 |
| 6 | -4.651919000 | -1.823512000 | 0.051040000  |
| 1 | -4.291698000 | -2.294612000 | 0.965904000  |
| 1 | -4.269291000 | -2.413070000 | -0.782419000 |
| 1 | -5.738794000 | -1.849803000 | 0.039009000  |
| 8 | -1.999854000 | -1.206158000 | 0.029857000  |
| 6 | -0.965440000 | 1.652597000  | -0.092542000 |
| 1 | -0.751194000 | 2.711512000  | -0.099188000 |
| 6 | -2.996728000 | 3.712509000  | -0.312250000 |
| 1 | -3.921135000 | 4.277007000  | -0.438956000 |

|    |              |              |              |
|----|--------------|--------------|--------------|
| 1  | -2.387249000 | 3.885985000  | -1.198875000 |
| 8  | -2.240007000 | 4.203597000  | 0.787731000  |
| 7  | 0.064147000  | 0.875566000  | -0.050652000 |
| 7  | 1.326553000  | 1.381561000  | -0.052711000 |
| 6  | 2.235332000  | 0.436908000  | -0.024677000 |
| 8  | 1.954127000  | -0.851087000 | 0.008490000  |
| 6  | 3.644031000  | 0.803408000  | -0.032505000 |
| 6  | 4.129205000  | 2.149309000  | -0.090085000 |
| 6  | 5.484841000  | 2.211525000  | -0.086898000 |
| 1  | 3.485345000  | 3.012954000  | -0.132554000 |
| 1  | 6.114245000  | 3.084056000  | -0.123785000 |
| 6  | 4.660462000  | -0.120945000 | 0.013186000  |
| 1  | 4.573673000  | -1.192197000 | 0.060862000  |
| 16 | 6.194289000  | 0.633142000  | -0.012917000 |
| 79 | -0.019384000 | -1.114032000 | 0.015815000  |
| 17 | 0.093505000  | -3.432170000 | 0.077977000  |
| 1  | -5.992744000 | 0.357506000  | -0.119571000 |
| 1  | -2.786109000 | 4.170990000  | 1.581458000  |

Monoprotonated complex,  $[\text{AuCl}(\text{HL})]^+$  2, proton is bound with hydrazide nitrogen

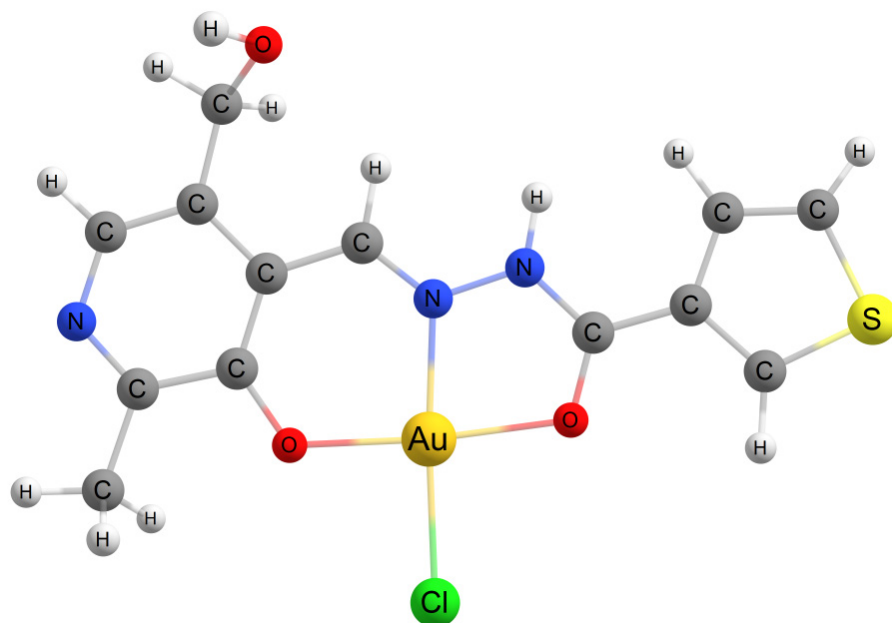

|   |              |              |              |
|---|--------------|--------------|--------------|
| 6 | -4.194042000 | -0.407366000 | -0.026163000 |
| 6 | -2.787271000 | -0.117841000 | -0.031084000 |
| 6 | -2.382338000 | 1.238252000  | -0.093199000 |
| 6 | -3.393918000 | 2.241436000  | -0.170727000 |
| 6 | -4.704870000 | 1.838081000  | -0.158243000 |
| 7 | -5.090614000 | 0.550295000  | -0.085703000 |
| 1 | -5.499440000 | 2.571364000  | -0.211499000 |
| 6 | -4.652854000 | -1.830724000 | 0.053415000  |
| 1 | -4.280756000 | -2.311649000 | 0.959535000  |
| 1 | -4.274009000 | -2.411379000 | -0.789233000 |

|    |              |              |              |
|----|--------------|--------------|--------------|
| 1  | -5.738887000 | -1.858935000 | 0.050837000  |
| 8  | -2.028887000 | -1.198734000 | 0.027256000  |
| 6  | -1.015663000 | 1.673300000  | -0.082775000 |
| 1  | -0.820723000 | 2.739313000  | -0.070559000 |
| 6  | -3.081097000 | 3.714584000  | -0.300723000 |
| 1  | -4.020464000 | 4.267185000  | -0.347824000 |
| 1  | -2.544435000 | 3.908755000  | -1.230201000 |
| 8  | -2.241071000 | 4.225422000  | 0.736589000  |
| 7  | -0.002388000 | 0.877178000  | -0.051296000 |
| 7  | 1.300641000  | 1.318069000  | -0.037165000 |
| 6  | 2.271620000  | 0.394676000  | -0.027699000 |
| 8  | 1.950331000  | -0.845918000 | -0.007922000 |
| 6  | 3.659903000  | 0.787120000  | -0.038465000 |
| 6  | 4.164738000  | 2.120159000  | -0.186976000 |
| 6  | 5.519657000  | 2.159196000  | -0.155658000 |
| 1  | 3.561625000  | 3.004426000  | -0.323359000 |
| 1  | 6.162727000  | 3.017267000  | -0.247754000 |
| 6  | 4.665567000  | -0.147042000 | 0.099501000  |
| 1  | 4.557984000  | -1.209769000 | 0.229123000  |
| 16 | 6.200567000  | 0.581608000  | 0.055521000  |
| 79 | -0.061978000 | -1.114876000 | 0.006093000  |
| 17 | 0.029338000  | -3.414458000 | 0.055460000  |
| 1  | 1.473873000  | 2.314844000  | -0.025370000 |
| 1  | -2.702073000 | 4.135890000  | 1.578393000  |

Bis-protonated complex,  $[\text{AuCl}(\text{H}_2\text{L})]^{2+}$

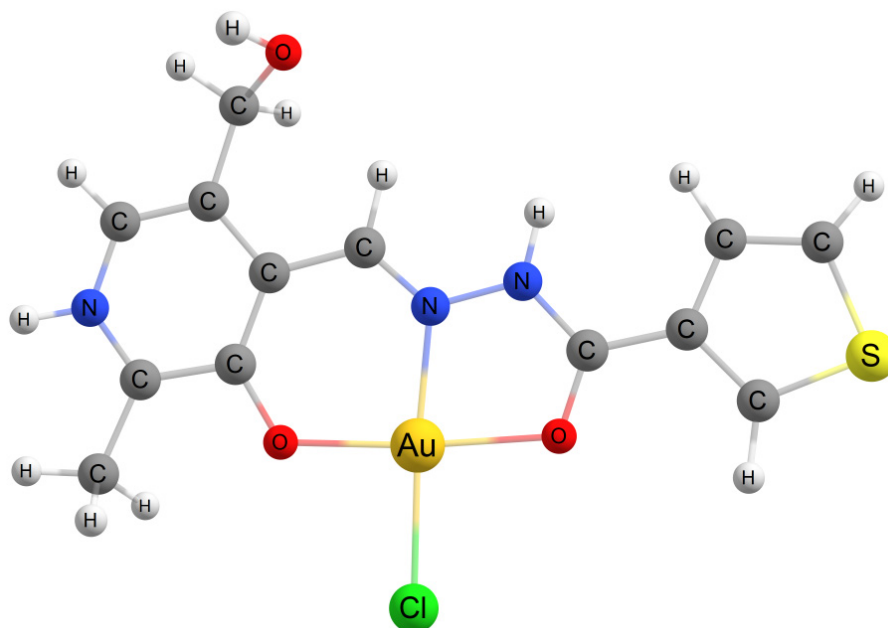

|   |              |              |              |
|---|--------------|--------------|--------------|
| 6 | -4.148588000 | -0.455416000 | -0.042058000 |
| 6 | -2.758097000 | -0.136672000 | -0.026041000 |
| 6 | -2.371947000 | 1.227409000  | -0.079140000 |
| 6 | -3.376301000 | 2.233800000  | -0.165635000 |

|    |              |              |              |
|----|--------------|--------------|--------------|
| 6  | -4.689286000 | 1.857475000  | -0.177697000 |
| 7  | -5.015609000 | 0.546425000  | -0.116154000 |
| 1  | -5.510557000 | 2.551738000  | -0.236316000 |
| 6  | -4.633870000 | -1.856525000 | 0.023981000  |
| 1  | -4.277300000 | -2.330766000 | 0.938739000  |
| 1  | -4.230012000 | -2.429665000 | -0.810946000 |
| 1  | -5.719618000 | -1.899225000 | -0.002777000 |
| 8  | -2.001496000 | -1.207830000 | 0.037852000  |
| 6  | -0.997284000 | 1.676615000  | -0.061100000 |
| 1  | -0.813089000 | 2.744023000  | -0.040565000 |
| 6  | -3.064160000 | 3.714577000  | -0.283305000 |
| 1  | -4.002118000 | 4.269219000  | -0.293320000 |
| 1  | -2.565002000 | 3.905716000  | -1.233438000 |
| 8  | -2.189354000 | 4.198206000  | 0.726513000  |
| 7  | 0.013446000  | 0.884339000  | -0.034395000 |
| 7  | 1.310292000  | 1.325185000  | -0.020483000 |
| 6  | 2.285812000  | 0.399360000  | -0.020880000 |
| 8  | 1.961799000  | -0.841675000 | -0.003894000 |
| 6  | 3.668779000  | 0.790466000  | -0.040234000 |
| 6  | 4.172506000  | 2.125825000  | -0.179597000 |
| 6  | 5.526880000  | 2.162818000  | -0.161834000 |
| 1  | 3.569054000  | 3.012110000  | -0.299662000 |
| 1  | 6.170259000  | 3.020961000  | -0.250857000 |
| 6  | 4.677263000  | -0.146798000 | 0.077208000  |
| 1  | 4.570641000  | -1.210960000 | 0.196112000  |
| 16 | 6.208761000  | 0.581469000  | 0.025353000  |
| 79 | -0.033415000 | -1.113102000 | 0.014680000  |
| 17 | 0.070321000  | -3.403098000 | 0.056266000  |
| 1  | -6.002486000 | 0.308749000  | -0.125992000 |
| 1  | 1.484339000  | 2.322501000  | -0.007542000 |
| 1  | -2.644688000 | 4.180989000  | 1.576139000  |

**Table S11.** Calculated IR spectra of different protonated species of complex formed by gold(III) and hydrazone derived from pyridoxal and thiophene-3-hydrazide (**PL-T3H**)

| Deprotonated complex,<br>[AuClL] |                       | Monoprotonated<br>complex 1,<br>[AuCl(HL)] <sup>+</sup> |                       | Monoprotonated<br>complex 2, [AuCl(HL)] <sup>+</sup> |                       | <i>Bis</i> -protonated<br>complex, [AuCl(H <sub>2</sub> L)] <sup>2+</sup> |                       |
|----------------------------------|-----------------------|---------------------------------------------------------|-----------------------|------------------------------------------------------|-----------------------|---------------------------------------------------------------------------|-----------------------|
| Frequency,<br>cm <sup>-1</sup>   | Relative<br>intensity | Frequency,<br>cm <sup>-1</sup>                          | Relative<br>intensity | Frequency,<br>cm <sup>-1</sup>                       | Relative<br>intensity | Frequency,<br>cm <sup>-1</sup>                                            | Relative<br>intensity |
| 27.6172                          | 0.1024                | 27.4851                                                 | 7.7841                | 26.906                                               | 0.0336                | 28.9272                                                                   | 6.3629                |
| 35.0597                          | 0.1788                | 36.5543                                                 | 0.4114                | 38.329                                               | 1.3361                | 41.1089                                                                   | 3.589                 |
| 48.9454                          | 0.6654                | 54.1988                                                 | 0.1442                | 55.6767                                              | 4.3786                | 56.848                                                                    | 3.5055                |
| 60.5317                          | 1.4078                | 61.0897                                                 | 3.7513                | 63.6362                                              | 0.8679                | 70.2527                                                                   | 1.6542                |
| 75.4251                          | 2.0134                | 77.3742                                                 | 3.9464                | 73.7461                                              | 4.0693                | 75.8476                                                                   | 3.9231                |
| 92.516                           | 1.1739                | 94.5617                                                 | 0.2856                | 88.2425                                              | 1.8251                | 91.0237                                                                   | 0.2042                |
| 105.1777                         | 3.3518                | 106.2105                                                | 1.1462                | 109.6334                                             | 0.6755                | 111.3252                                                                  | 0.8158                |
| 111.2205                         | 1.582                 | 111.7637                                                | 3.837                 | 113.7028                                             | 3.8251                | 116.7229                                                                  | 4.8022                |
| 118.5923                         | 1.4305                | 123.9787                                                | 0.8464                | 122.4019                                             | 9.2966                | 129.2421                                                                  | 4.715                 |
| 159.0936                         | 0.1506                | 148.0932                                                | 0.5434                | 156.6095                                             | 0.6485                | 145.6025                                                                  | 1.536                 |
| 174.7125                         | 7.8118                | 174.4441                                                | 2.252                 | 168.7264                                             | 3.3522                | 171.5479                                                                  | 1.9689                |
| 183.5342                         | 1.8168                | 183.0744                                                | 3.6852                | 182.1978                                             | 5.7068                | 182.475                                                                   | 3.0605                |
| 190.2963                         | 0.8095                | 189.0582                                                | 2.0991                | 184.3383                                             | 2.5428                | 186.434                                                                   | 7.0814                |
| 200.7359                         | 0.7417                | 205.3032                                                | 2.1482                | 193.2473                                             | 0.9135                | 196.3496                                                                  | 4.6872                |
| 210.711                          | 1.0173                | 209.9624                                                | 3.1279                | 205.7252                                             | 4.3104                | 206.9348                                                                  | 5.8245                |
| 236.5845                         | 4.7971                | 237.3592                                                | 1.9688                | 232.5789                                             | 11.029                | 234.1074                                                                  | 6.8213                |
| 251.8455                         | 3.8131                | 252.6089                                                | 1.703                 | 248.7063                                             | 5.134                 | 251.0784                                                                  | 3.7034                |
| 277.876                          | 1.7073                | 274.3013                                                | 5.1657                | 273.0561                                             | 0.7744                | 272.1755                                                                  | 4.4859                |
| 307.0467                         | 134.8514              | 307.5508                                                | 114.1462              | 318.9658                                             | 61.5689               | 322.173                                                                   | 39.5771               |
| 324.9411                         | 71.94                 | 333.483                                                 | 74.25                 | 335.9558                                             | 11.7558               | 340.3046                                                                  | 12.4446               |
| 343.0572                         | 14.2408               | 341.6732                                                | 17.3355               | 347.9                                                | 59.5419               | 356.0424                                                                  | 57.2468               |
| 361.8006                         | 72.4973               | 362.1342                                                | 71.4869               | 365.6966                                             | 142.1114              | 371.1443                                                                  | 143.9932              |
| 401.1006                         | 3.2789                | 395.6307                                                | 7.3871                | 384.9019                                             | 7.6666                | 387.672                                                                   | 7.9362                |
| 411.4084                         | 17.8465               | 413.0048                                                | 17.163                | 393.8681                                             | 5.7461                | 407.8388                                                                  | 12.0488               |
| 440.1089                         | 1.1306                | 445.565                                                 | 23.7884               | 408.3423                                             | 6.6958                | 411.7586                                                                  | 5.6473                |
| 447.5675                         | 33.7629               | 458.8861                                                | 2.1204                | 446.7178                                             | 39.7613               | 444.5187                                                                  | 28.5035               |
| 469.0113                         | 0.4129                | 471.528                                                 | 0.2544                | 466.6675                                             | 0.6033                | 467.0831                                                                  | 0.4186                |
| 485.7006                         | 28.7124               | 485.5579                                                | 19.5812               | 480.2208                                             | 39.2739               | 481.0579                                                                  | 31.7966               |
| 530.6934                         | 12.3619               | 529.2076                                                | 14.5421               | 503.7035                                             | 103.2496              | 524.6466                                                                  | 112.6153              |
| 572.3189                         | 11.5035               | 569.1932                                                | 1.6879                | 530.9338                                             | 18.9756               | 531.6476                                                                  | 18.4046               |
| 578.2613                         | 21.1341               | 570.9069                                                | 10.2936               | 567.6652                                             | 7.4964                | 566.0746                                                                  | 6.2392                |
| 596.8078                         | 30.0503               | 595.0738                                                | 11.2341               | 572.3475                                             | 34.2293               | 568.9416                                                                  | 14.5878               |
| 604.8485                         | 6.0222                | 604.2046                                                | 3.4872                | 589.1058                                             | 49.2968               | 589.1816                                                                  | 22.2748               |
| 639.7546                         | 0.4207                | 639.4441                                                | 0.5313                | 599.1311                                             | 20.3529               | 597.6528                                                                  | 13.329                |
| 649.0613                         | 73.4963               | 655.6883                                                | 29.4188               | 636.0398                                             | 81.4645               | 637.974                                                                   | 12.2048               |
| 660.9028                         | 9.8474                | 664.8547                                                | 20.7282               | 640.3558                                             | 5.2                   | 647.3957                                                                  | 34.6581               |
| 684.9004                         | 36.3857               | 686.3239                                                | 30.5823               | 652.4459                                             | 10.4931               | 656.3677                                                                  | 19.633                |
| 713.7437                         | 28.9107               | 716.4902                                                | 32.7423               | 683.2936                                             | 11.6767               | 684.0284                                                                  | 9.4359                |
| 735.2849                         | 74.3431               | 738.8468                                                | 72.7652               | 716.1179                                             | 44.869                | 717.8768                                                                  | 47.8824               |
| 757.7908                         | 0.7352                | 759.6665                                                | 3.3328                | 738.0043                                             | 49.4252               | 740.1186                                                                  | 47.4861               |

|           |          |           |          |           |           |           |           |
|-----------|----------|-----------|----------|-----------|-----------|-----------|-----------|
| 775.7971  | 7.4481   | 776.2129  | 1.5114   | 756.9245  | 2.3364    | 758.2718  | 5.4183    |
| 800.5819  | 13.9517  | 790.1441  | 56.6989  | 773.9753  | 6.1789    | 777.7812  | 10.783    |
| 805.7196  | 3.7725   | 802.4689  | 24.5695  | 798.4851  | 25.3986   | 793.7099  | 59.826    |
| 836.3404  | 45.6745  | 835.8798  | 63.2752  | 804.6152  | 5.5925    | 802.5677  | 19.0504   |
| 862.6486  | 160.9723 | 839.4276  | 56.6833  | 844.5656  | 43.9592   | 845.2562  | 99.7425   |
| 894.7256  | 6.5887   | 865.3876  | 202.8294 | 868.1595  | 107.408   | 846.7735  | 36.2469   |
| 918.4351  | 30.4123  | 896.7227  | 10.6503  | 902.513   | 54.3313   | 870.0365  | 91.2273   |
| 925.7547  | 0.552    | 920.9493  | 1.4698   | 914.6995  | 0.0604    | 905.6054  | 78.3694   |
| 952.5042  | 6.6369   | 927.1664  | 0.4505   | 919.4076  | 28.636    | 916.303   | 0.0183    |
| 957.8022  | 16.4762  | 940.9143  | 11.7258  | 957.2633  | 7.3061    | 929.2535  | 2.0525    |
| 968.2808  | 18.6367  | 962.4192  | 12.3923  | 964.3581  | 66.6005   | 955.1999  | 4.0932    |
| 991.4419  | 88.0561  | 969.8266  | 14.5019  | 974.7423  | 50.3682   | 967.4169  | 64.0631   |
| 1019.1274 | 39.7875  | 1001.5905 | 100.3826 | 990.6492  | 58.4462   | 975.6709  | 52.8063   |
| 1030.1959 | 190.4458 | 1032.1395 | 172.5435 | 1027.6195 | 78.5583   | 1003.1333 | 53.6588   |
| 1054.0947 | 1.7983   | 1045.8513 | 205.2627 | 1045.198  | 59.156    | 1043.4895 | 45.0014   |
| 1071.0267 | 18.5269  | 1057.983  | 9.066    | 1054.8153 | 1.7934    | 1053.653  | 173.4122  |
| 1088.5304 | 22.4557  | 1080.2434 | 34.0537  | 1070.0178 | 42.0429   | 1059.5695 | 10.1104   |
| 1102.6086 | 6.5675   | 1089.0199 | 78.6173  | 1119.728  | 2.6011    | 1076.4436 | 53.3829   |
| 1142.6982 | 111.3095 | 1105.0863 | 8.1401   | 1133.405  | 44.4736   | 1120.7712 | 2.1193    |
| 1199.3056 | 69.4709  | 1150.9353 | 237.7233 | 1177.4556 | 27.0413   | 1134.7908 | 54.0082   |
| 1210.5636 | 148.6633 | 1206.017  | 14.5398  | 1198.4115 | 268.3529  | 1180.5996 | 89.0181   |
| 1225.527  | 90.209   | 1221.5948 | 124.1537 | 1205.6345 | 49.2784   | 1210.1657 | 15.9333   |
| 1289.6651 | 215.7784 | 1229.2997 | 95.2692  | 1250.4621 | 23.2274   | 1214.0918 | 248.7736  |
| 1310.0934 | 154.468  | 1270.5585 | 145.3096 | 1292.8864 | 188.9153  | 1252.5765 | 21.518    |
| 1323.2609 | 130.92   | 1317.935  | 208.2056 | 1311.0457 | 66.1012   | 1268.0149 | 154.012   |
| 1325.6362 | 138.9546 | 1329.4746 | 110.9396 | 1321.5142 | 51.0302   | 1319.1178 | 134.25    |
| 1369.2489 | 20.1413  | 1341.2187 | 239.5857 | 1325.1105 | 417.1881  | 1325.8386 | 180.1276  |
| 1391.4861 | 128.9124 | 1375.1671 | 21.2581  | 1371.4546 | 41.7602   | 1338.1655 | 252.9993  |
| 1400.9341 | 43.9005  | 1392.3893 | 192.8216 | 1382.5653 | 0.118     | 1380.6886 | 112.2017  |
| 1410.028  | 7.7675   | 1402.6763 | 49.7287  | 1397.6861 | 194.1218  | 1384.7673 | 164.2247  |
| 1413.1045 | 44.0375  | 1412.0785 | 105.6573 | 1404.184  | 104.1255  | 1395.6289 | 86.8411   |
| 1425.9655 | 54.4707  | 1422.7514 | 147.7344 | 1411.6554 | 2.9929    | 1404.5927 | 99.8777   |
| 1459.229  | 130.1885 | 1426.9616 | 16.9933  | 1413.5296 | 169.9631  | 1414.3337 | 248.8308  |
| 1465.0039 | 24.5185  | 1437.9994 | 56.2576  | 1454.7099 | 232.1541  | 1422.3839 | 13.8231   |
| 1466.689  | 13.2477  | 1452.7957 | 16.9058  | 1464.5709 | 8.6344    | 1436.494  | 50.7515   |
| 1485.0262 | 3.2614   | 1460.3117 | 135.6936 | 1466.8124 | 11.8927   | 1450.927  | 18.3375   |
| 1511.6825 | 6.6445   | 1481.7738 | 475.7961 | 1482.7003 | 51.3212   | 1455.5042 | 335.175   |
| 1530.9058 | 585.6924 | 1501.8561 | 580.139  | 1501.5179 | 313.702   | 1482.762  | 44.0536   |
| 1552.6116 | 25.6853  | 1510.0008 | 119.2185 | 1508.6609 | 57.3089   | 1497.6395 | 120.994   |
| 1568.6721 | 518.571  | 1530.7184 | 572.8872 | 1548.6327 | 152.7538  | 1508.7019 | 119.3267  |
| 1601.7883 | 77.2276  | 1554.9854 | 535.7885 | 1551.2829 | 266.9192  | 1527.8841 | 525.5469  |
| 1650.5532 | 178.6465 | 1616.804  | 43.8987  | 1590.9777 | 1148.3749 | 1548.2386 | 48.5887   |
| 3035.237  | 25.9053  | 1650.7512 | 32.9038  | 1600.8561 | 41.79     | 1588.6901 | 1461.8212 |
| 3036.0841 | 70.6858  | 1669.868  | 65.242   | 1667.0673 | 69.174    | 1619.4354 | 5.8585    |
| 3076.992  | 29.0597  | 3048.6317 | 2.7015   | 3038.0233 | 15.0361   | 1663.7122 | 45.5725   |
| 3080.8667 | 17.3148  | 3049.9963 | 52.3205  | 3041.9497 | 60.5284   | 1683.6189 | 19.6216   |



|           |         |           |          |           |          |           |          |
|-----------|---------|-----------|----------|-----------|----------|-----------|----------|
| 3134.3226 | 23.2023 | 3091.8821 | 19.0801  | 3079.8025 | 27.4499  | 3049.53   | 2.093    |
| 3162.4752 | 45.6699 | 3103.1246 | 0.7331   | 3084.945  | 13.5508  | 3054.6969 | 35.6572  |
| 3196.3643 | 30.0781 | 3137.3588 | 15.6893  | 3139.0651 | 18.8372  | 3094.6857 | 21.5102  |
| 3226.802  | 2.1991  | 3206.428  | 48.1634  | 3169.3365 | 81.4804  | 3104.8134 | 0.1032   |
| 3253.5174 | 0.6998  | 3228.5918 | 3.2214   | 3170.184  | 34.2652  | 3140.3879 | 13.2417  |
| 3261.3515 | 7.5785  | 3251.6453 | 3.923    | 3215.7677 | 0.569    | 3171.4866 | 129.8298 |
| 3792.0461 | 68.2048 | 3254.9209 | 1.4073   | 3259.0008 | 9.159    | 3217.3362 | 0.6582   |
|           |         | 3261.5316 | 8.9888   | 3262.4685 | 14.2639  | 3257.5095 | 9.5576   |
|           |         | 3542.7736 | 392.3161 | 3573.6199 | 164.7467 | 3259.8369 | 13.4429  |
|           |         | 3791.1307 | 91.068   | 3792.4833 | 76.112   | 3262.378  | 13.7978  |
|           |         |           |          |           |          | 3526.3431 | 355.5317 |
|           |         |           |          |           |          | 3565.5619 | 179.8241 |
|           |         |           |          |           |          | 3793.1983 | 97.7874  |

**Table S12.** Calculated TD-DFT spectra of different protonated species of complex formed by gold(III) and hydrazone derived from pyridoxal and thiophene-3-hydrazide (**PL-T3H**)

| Deprotonated complex, [AuClL] |                     | Monoprotonated complex 1, [AuCl(HL)] <sup>+</sup> |                     | Monoprotonated complex 2, [AuCl(HL)] <sup>+</sup> |                     | <i>Bis</i> -protonated complex, [AuCl(H <sub>2</sub> L)] <sup>2+</sup> |                     |
|-------------------------------|---------------------|---------------------------------------------------|---------------------|---------------------------------------------------|---------------------|------------------------------------------------------------------------|---------------------|
| $\lambda$ , nm                | oscillator strength | $\lambda$ , nm                                    | oscillator strength | $\lambda$ , nm                                    | oscillator strength | $\lambda$ , nm                                                         | oscillator strength |
| 467.88                        | 0                   | 432.77                                            | 0.0002              | 516.73                                            | 0                   | 446.71                                                                 | 0.0001              |
| 368.43                        | 0.0081              | 380.53                                            | 0.4259              | 377.08                                            | 0.0906              | 374.51                                                                 | 0.0659              |
| 366.64                        | 0.2199              | 348.15                                            | 0                   | 365.5                                             | 0.0002              | 363.59                                                                 | 0.0007              |
| 316.14                        | 0.0275              | 326.27                                            | 0.0582              | 351.09                                            | 0.0639              | 359.82                                                                 | 0.1824              |
| 306.05                        | 0.0002              | 319.98                                            | 0.0006              | 316.36                                            | 0.0006              | 311.72                                                                 | 0.002               |
| 300.26                        | 0.5547              | 309.84                                            | 0.4231              | 309.39                                            | 0.0106              | 301.5                                                                  | 0.0005              |
| 291.93                        | 0.0115              | 292.02                                            | 0.0001              | 302.38                                            | 0.0004              | 297.69                                                                 | 0.4448              |
| 288.18                        | 0                   | 284.95                                            | 0.0205              | 298.87                                            | 0.0996              | 286.6                                                                  | 0.1033              |
| 279.16                        | 0.0333              | 282.4                                             | 0.0296              | 284.03                                            | 0.7723              | 284.42                                                                 | 0.1359              |
| 262.49                        | 0.4246              | 270.44                                            | 0.0005              | 275.41                                            | 0.1674              | 278.34                                                                 | 0.0001              |
| 256.88                        | 0.0037              | 264.91                                            | 0.0005              | 271.49                                            | 0.0002              | 266.94                                                                 | 0.2365              |
| 254.3                         | 0.0027              | 260.48                                            | 0.1655              | 268.87                                            | 0.1474              | 261.08                                                                 | 0.0979              |
| 244.77                        | 0.0624              | 256.72                                            | 0.1506              | 258.03                                            | 0.0273              | 250.51                                                                 | 0.15                |
| 244.27                        | 0.2224              | 249.89                                            | 0.0129              | 251.53                                            | 0.1308              | 241.37                                                                 | 0.0095              |
| 242.94                        | 0.0625              | 237.21                                            | 0.0042              | 250.76                                            | 0.0773              | 237.72                                                                 | 0.0044              |
| 235.04                        | 0.0038              | 232.61                                            | 0.2809              | 233.82                                            | 0.0299              | 237.19                                                                 | 0.0927              |
| 227.93                        | 0.002               | 230.54                                            | 0.0512              | 228.3                                             | 0.0578              | 230.39                                                                 | 0.031               |
| 225.9                         | 0.0944              | 226.61                                            | 0.0024              | 223.17                                            | 0.033               | 225.32                                                                 | 0.0625              |
| 218.71                        | 0.0319              | 225.55                                            | 0.1168              | 218.77                                            | 0.0051              | 222.27                                                                 | 0.0553              |
| 215.17                        | 0.0233              | 220.14                                            | 0.0675              | 216.12                                            | 0.0733              | 219.12                                                                 | 0.0678              |
| 213.02                        | 0.2074              | 217.22                                            | 0.0419              | 213.2                                             | 0.1016              | 217.4                                                                  | 0.1339              |
| 210.51                        | 0.0121              | 215.71                                            | 0.092               | 211.89                                            | 0.1486              | 210.9                                                                  | 0.0355              |
| 209.57                        | 0.1409              | 210.71                                            | 0.252               | 210.45                                            | 0.0074              | 208.89                                                                 | 0.3313              |
| 207.5                         | 0.0142              | 208.05                                            | 0.0669              | 208.96                                            | 0.0893              | 208.55                                                                 | 0.0497              |
| 207                           | 0.0722              | 206.99                                            | 0.0408              | 205.77                                            | 0.0573              | 204.35                                                                 | 0.2635              |
| 206.71                        | 0.1414              | 206.54                                            | 0.046               | 204.49                                            | 0.0084              | 196.81                                                                 | 0.0018              |
| 204.86                        | 0.0051              | 199.1                                             | 0.0396              | 204.28                                            | 0.0245              | 195.97                                                                 | 0.0067              |
| 204.15                        | 0.0304              | 197.89                                            | 0.1199              | 201.88                                            | 0.1193              | 195.11                                                                 | 0.0277              |
| 200.05                        | 0.1213              | 192.71                                            | 0.1571              | 199.07                                            | 0.1621              | 193.24                                                                 | 0.2282              |
| 195.9                         | 0.0023              | 192.58                                            | 0.0239              | 194.84                                            | 0.1081              | 190.63                                                                 | 0.0108              |

**Table S13.** Optimized geometry (*xyz*-coordinates) of different protonated species of complex formed by gold(III) and hydrazone derived from pyridoxal and isoniazid (**PL-INH**)

Deprotonated complex, [AuClL]

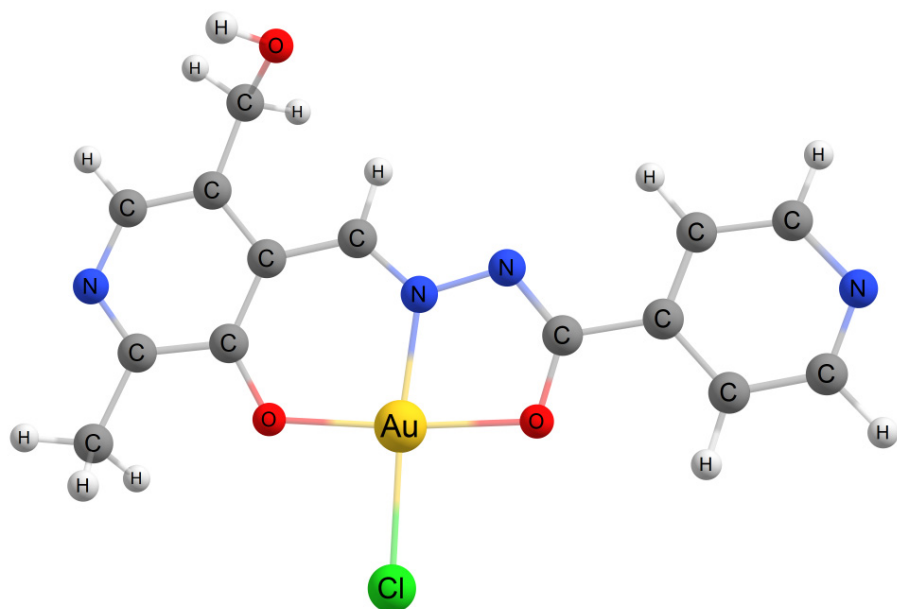

|   |              |              |              |
|---|--------------|--------------|--------------|
| 6 | -4.138275000 | -0.359589000 | -0.028430000 |
| 6 | -2.727951000 | -0.100925000 | -0.043617000 |
| 6 | -2.292923000 | 1.244433000  | -0.114181000 |
| 6 | -3.285677000 | 2.264982000  | -0.192321000 |
| 6 | -4.606343000 | 1.890433000  | -0.174325000 |
| 7 | -5.022256000 | 0.612521000  | -0.091760000 |
| 1 | -5.383832000 | 2.642189000  | -0.229769000 |
| 6 | -4.624561000 | -1.774150000 | 0.063380000  |
| 1 | -4.251577000 | -2.259126000 | 0.967129000  |
| 1 | -4.267210000 | -2.367361000 | -0.780132000 |
| 1 | -5.711147000 | -1.782153000 | 0.073170000  |
| 8 | -1.979712000 | -1.187471000 | 0.010069000  |
| 6 | -0.916216000 | 1.651190000  | -0.111689000 |
| 1 | -0.685918000 | 2.707716000  | -0.124306000 |
| 6 | -2.942310000 | 3.730975000  | -0.308217000 |
| 1 | -3.866986000 | 4.297503000  | -0.432789000 |
| 1 | -2.328271000 | 3.915626000  | -1.190322000 |
| 8 | -2.183413000 | 4.235078000  | 0.794597000  |
| 7 | 0.105784000  | 0.862816000  | -0.066930000 |
| 7 | 1.385443000  | 1.357921000  | -0.068950000 |
| 6 | 2.273566000  | 0.408232000  | -0.030789000 |
| 8 | 1.987073000  | -0.876952000 | 0.006687000  |

|    |              |              |              |
|----|--------------|--------------|--------------|
| 79 | -0.002205000 | -1.120212000 | 0.006414000  |
| 17 | 0.080538000  | -3.447922000 | 0.081984000  |
| 6  | 3.710047000  | 0.760966000  | -0.028348000 |
| 6  | 4.131608000  | 2.088485000  | -0.109116000 |
| 6  | 5.492132000  | 2.354653000  | -0.102783000 |
| 7  | 6.432442000  | 1.407693000  | -0.022228000 |
| 6  | 6.019290000  | 0.140951000  | 0.055148000  |
| 6  | 4.682199000  | -0.233652000 | 0.055149000  |
| 1  | 3.415614000  | 2.892810000  | -0.176341000 |
| 1  | 5.842183000  | 3.377934000  | -0.165799000 |
| 1  | 6.791454000  | -0.616147000 | 0.120432000  |
| 1  | 4.406158000  | -1.274623000 | 0.119671000  |
| 1  | -2.704441000 | 4.123260000  | 1.597685000  |

Monoprotonated complex,  $[\text{AuCl}(\text{HL})]^+$  1, proton is bound with heterocyclic nitrogen of pyridoxal

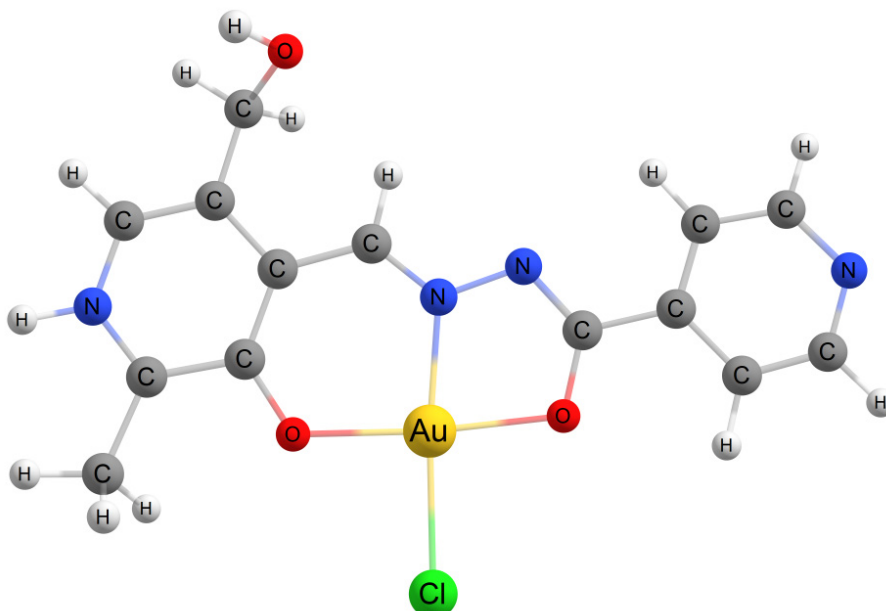

|   |              |              |              |
|---|--------------|--------------|--------------|
| 6 | -4.093447000 | -0.401178000 | -0.035475000 |
| 6 | -2.698549000 | -0.117632000 | -0.036092000 |
| 6 | -2.277437000 | 1.236635000  | -0.101556000 |
| 6 | -3.260753000 | 2.262956000  | -0.191509000 |
| 6 | -4.583313000 | 1.920496000  | -0.192561000 |
| 7 | -4.942084000 | 0.618956000  | -0.113265000 |
| 1 | -5.386933000 | 2.634838000  | -0.255178000 |
| 6 | -4.612520000 | -1.790212000 | 0.048887000  |
| 1 | -4.255740000 | -2.266311000 | 0.962536000  |
| 1 | -4.234797000 | -2.380713000 | -0.786141000 |
| 1 | -5.699543000 | -1.807185000 | 0.037066000  |
| 8 | -1.955816000 | -1.196282000 | 0.024067000  |
| 6 | -0.895568000 | 1.653269000  | -0.091958000 |
| 1 | -0.670619000 | 2.710181000  | -0.098302000 |

|    |              |              |              |
|----|--------------|--------------|--------------|
| 6  | -2.908579000 | 3.733226000  | -0.302453000 |
| 1  | -3.828974000 | 4.307151000  | -0.414404000 |
| 1  | -2.309513000 | 3.904260000  | -1.196651000 |
| 8  | -2.132312000 | 4.211276000  | 0.789187000  |
| 7  | 0.123581000  | 0.864377000  | -0.050963000 |
| 7  | 1.394396000  | 1.359146000  | -0.053039000 |
| 6  | 2.287882000  | 0.407867000  | -0.024433000 |
| 8  | 2.001330000  | -0.874527000 | 0.008028000  |
| 79 | 0.023876000  | -1.124018000 | 0.013175000  |
| 17 | 0.116061000  | -3.441095000 | 0.072039000  |
| 6  | 3.721645000  | 0.762662000  | -0.029757000 |
| 6  | 4.135824000  | 2.092697000  | -0.106853000 |
| 6  | 5.495778000  | 2.363061000  | -0.109956000 |
| 7  | 6.438351000  | 1.418049000  | -0.041869000 |
| 6  | 6.031653000  | 0.148950000  | 0.032260000  |
| 6  | 4.696250000  | -0.230736000 | 0.040989000  |
| 1  | 3.416588000  | 2.894759000  | -0.164290000 |
| 1  | 5.842347000  | 3.387505000  | -0.170452000 |
| 1  | 6.807359000  | -0.605049000 | 0.087276000  |
| 1  | 4.424560000  | -1.273020000 | 0.102180000  |
| 1  | -2.669405000 | 4.186678000  | 1.589328000  |
| 1  | -5.933119000 | 0.403156000  | -0.111989000 |

Monoprotonated complex,  $[\text{AuCl}(\text{HL})]^+$  2, proton is bound with hydrazide nitrogen

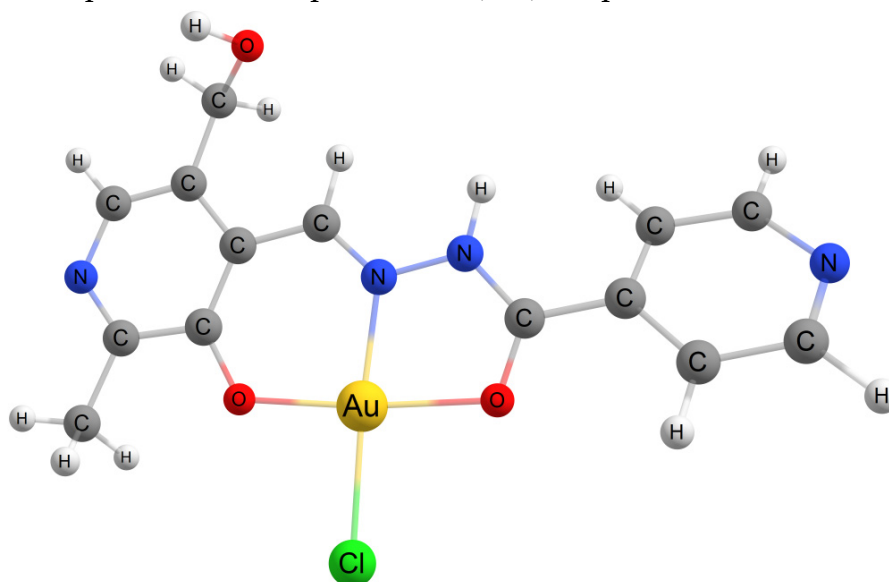

|   |              |              |              |
|---|--------------|--------------|--------------|
| 6 | -4.143382000 | -0.355408000 | -0.033414000 |
| 6 | -2.731455000 | -0.086750000 | -0.036213000 |
| 6 | -2.306426000 | 1.264932000  | -0.070047000 |
| 6 | -3.303289000 | 2.285730000  | -0.115751000 |
| 6 | -4.619360000 | 1.901657000  | -0.104759000 |
| 7 | -5.023567000 | 0.617603000  | -0.063914000 |
| 1 | -5.403617000 | 2.647191000  | -0.132778000 |

|    |              |              |              |
|----|--------------|--------------|--------------|
| 6  | -4.623649000 | -1.772924000 | 0.011528000  |
| 1  | -4.256798000 | -2.281870000 | 0.904352000  |
| 1  | -4.255646000 | -2.337601000 | -0.846606000 |
| 1  | -5.709942000 | -1.784246000 | 0.011187000  |
| 8  | -1.991362000 | -1.180331000 | -0.002996000 |
| 6  | -0.935072000 | 1.677835000  | -0.060480000 |
| 1  | -0.722426000 | 2.740021000  | -0.028344000 |
| 6  | -2.968094000 | 3.756928000  | -0.209292000 |
| 1  | -3.898758000 | 4.325613000  | -0.225563000 |
| 1  | -2.443155000 | 3.968099000  | -1.141770000 |
| 8  | -2.103293000 | 4.223899000  | 0.827983000  |
| 7  | 0.064988000  | 0.863215000  | -0.051714000 |
| 7  | 1.376211000  | 1.285174000  | -0.027638000 |
| 6  | 2.324134000  | 0.348422000  | -0.028400000 |
| 8  | 1.998228000  | -0.883041000 | -0.021200000 |
| 79 | -0.024754000 | -1.129751000 | -0.016410000 |
| 17 | 0.029181000  | -3.429345000 | 0.011238000  |
| 6  | 3.744459000  | 0.725361000  | -0.028206000 |
| 6  | 4.192947000  | 1.934556000  | -0.557552000 |
| 6  | 5.555160000  | 2.199302000  | -0.518090000 |
| 7  | 6.453021000  | 1.360396000  | 0.001266000  |
| 6  | 6.011477000  | 0.203471000  | 0.499642000  |
| 6  | 4.674161000  | -0.166024000 | 0.504668000  |
| 1  | 3.527150000  | 2.646274000  | -1.022948000 |
| 1  | 5.935240000  | 3.126233000  | -0.928087000 |
| 1  | 6.757264000  | -0.462291000 | 0.914849000  |
| 1  | 4.364609000  | -1.111739000 | 0.921852000  |
| 1  | -2.554654000 | 4.124879000  | 1.673988000  |
| 1  | 1.567400000  | 2.277178000  | 0.047130000  |

Bis-protonated complex,  $[\text{AuCl}(\text{H}_2\text{L})]^{2+}$

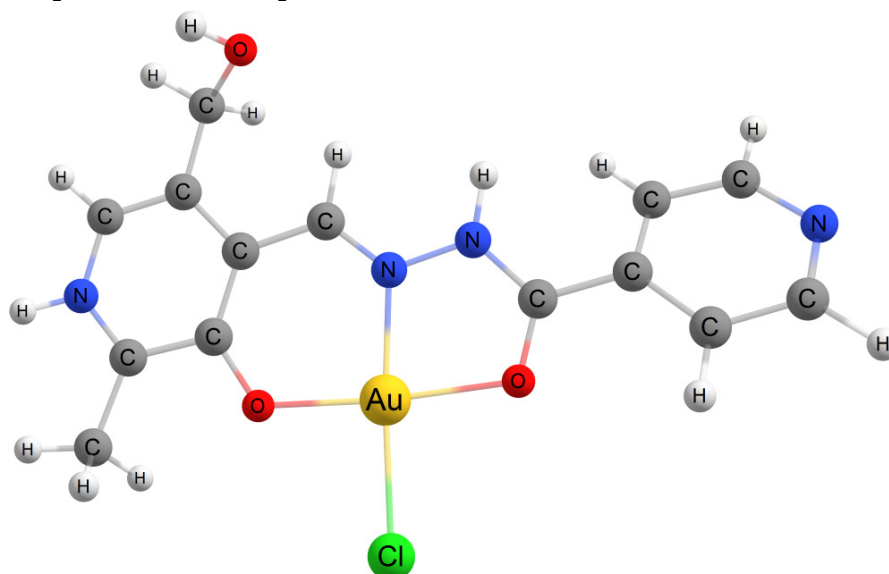

|    |              |              |              |
|----|--------------|--------------|--------------|
| 6  | -4.098811000 | -0.408164000 | -0.043661000 |
| 6  | -2.702780000 | -0.108570000 | -0.030378000 |
| 6  | -2.298797000 | 1.251215000  | -0.057614000 |
| 6  | -3.289666000 | 2.273937000  | -0.111117000 |
| 6  | -4.607248000 | 1.915636000  | -0.120407000 |
| 7  | -4.950607000 | 0.607293000  | -0.087620000 |
| 1  | -5.420030000 | 2.621410000  | -0.154336000 |
| 6  | -4.603062000 | -1.803296000 | -0.005957000 |
| 1  | -4.243113000 | -2.304180000 | 0.893133000  |
| 1  | -4.216230000 | -2.361369000 | -0.859045000 |
| 1  | -5.689526000 | -1.830376000 | -0.021735000 |
| 8  | -1.962868000 | -1.192111000 | 0.006373000  |
| 6  | -0.918875000 | 1.680240000  | -0.043488000 |
| 1  | -0.718410000 | 2.744314000  | -0.004997000 |
| 6  | -2.957479000 | 3.752946000  | -0.194545000 |
| 1  | -3.887132000 | 4.320976000  | -0.171960000 |
| 1  | -2.473182000 | 3.961964000  | -1.148590000 |
| 8  | -2.056978000 | 4.195506000  | 0.811227000  |
| 7  | 0.078702000  | 0.870955000  | -0.038245000 |
| 7  | 1.385049000  | 1.294741000  | -0.016002000 |
| 6  | 2.336783000  | 0.356621000  | -0.025675000 |
| 8  | 2.009439000  | -0.874511000 | -0.022120000 |
| 79 | 0.004336000  | -1.127401000 | -0.010207000 |
| 17 | 0.074880000  | -3.417250000 | 0.012232000  |
| 6  | 3.754714000  | 0.731019000  | -0.031695000 |
| 6  | 4.197911000  | 1.953006000  | -0.536980000 |
| 6  | 5.560730000  | 2.214850000  | -0.505880000 |
| 7  | 6.462207000  | 1.362112000  | -0.016403000 |
| 6  | 6.025891000  | 0.193806000  | 0.459190000  |
| 6  | 4.688473000  | -0.174853000 | 0.470280000  |
| 1  | 3.529322000  | 2.677278000  | -0.978119000 |
| 1  | 5.937768000  | 3.150946000  | -0.897107000 |
| 1  | 6.775613000  | -0.481933000 | 0.850099000  |
| 1  | 4.382686000  | -1.129439000 | 0.869483000  |
| 1  | -2.498967000 | 4.169814000  | 1.667726000  |
| 1  | 1.575694000  | 2.287456000  | 0.059534000  |
| 1  | -5.940938000 | 0.383950000  | -0.094023000 |

**Table S14.** Calculated IR spectra of different protonated species of complex formed by gold(III) and hydrazone derived from pyridoxal and isoniazid (**PL-INH**)

| Deprotonated complex,<br>[AuCIL] |                       | Monoprotonated<br>complex 1,<br>[AuCl(HL)] <sup>+</sup> |                       | Monoprotonated<br>complex 2, [AuCl(HL)] <sup>+</sup> |                       | <i>Bis</i> -protonated<br>complex, [AuCl(H <sub>2</sub> L)] <sup>2+</sup> |                       |
|----------------------------------|-----------------------|---------------------------------------------------------|-----------------------|------------------------------------------------------|-----------------------|---------------------------------------------------------------------------|-----------------------|
| Frequency,<br>cm <sup>-1</sup>   | Relative<br>intensity | Frequency,<br>cm <sup>-1</sup>                          | Relative<br>intensity | Frequency,<br>cm <sup>-1</sup>                       | Relative<br>intensity | Frequency,<br>cm <sup>-1</sup>                                            | Relative<br>intensity |
| 25.234                           | 0.005                 | 25.7909                                                 | 0.5011                | 27.436                                               | 0.3728                | 25.7816                                                                   | 2.2386                |
| 28.4357                          | 0.0328                | 29.1851                                                 | 4.7583                | 34.6869                                              | 0.0616                | 29.9603                                                                   | 1.8541                |
| 46.7445                          | 1.938                 | 51.4667                                                 | 1.1232                | 56.9997                                              | 10.6151               | 56.8783                                                                   | 9.5267                |
| 63.7235                          | 1.2059                | 64.5623                                                 | 2.3746                | 61.3605                                              | 0.6202                | 62.6262                                                                   | 3.8075                |
| 75.8068                          | 2.7038                | 78.6758                                                 | 4.7726                | 74.6905                                              | 4.7075                | 73.495                                                                    | 3.1154                |
| 93.0604                          | 0.0922                | 95.1959                                                 | 2.0014                | 91.2427                                              | 0.235                 | 93.5734                                                                   | 1.4026                |
| 104.3364                         | 1.5697                | 105.1486                                                | 0.302                 | 111.9386                                             | 1.7732                | 112.9285                                                                  | 1.8602                |
| 110.661                          | 1.4969                | 111.6764                                                | 3.6807                | 113.384                                              | 3.1776                | 116.2858                                                                  | 5.9007                |
| 118.0337                         | 3.3218                | 124.2903                                                | 1.3108                | 124.6729                                             | 14.7695               | 126.2376                                                                  | 6.8738                |
| 158.5044                         | 0.2976                | 149.569                                                 | 0.9839                | 156.2912                                             | 0.4915                | 144.6969                                                                  | 2.8736                |
| 174.3077                         | 4.9522                | 174.1649                                                | 2.2357                | 167.6553                                             | 4.581                 | 169.7349                                                                  | 3.8756                |
| 183.71                           | 0.6742                | 182.1263                                                | 1.1961                | 177.3144                                             | 3.641                 | 179.9165                                                                  | 2.7511                |
| 190.2579                         | 1.7542                | 191.0754                                                | 1.0237                | 187.4333                                             | 3.4289                | 187.6066                                                                  | 3.839                 |
| 203.2267                         | 0.5421                | 207.3802                                                | 0.6718                | 196.637                                              | 2.6337                | 200.7883                                                                  | 5.2239                |
| 213.6169                         | 1.359                 | 213.19                                                  | 2.6897                | 208.5171                                             | 4.2698                | 211.2957                                                                  | 6.3462                |
| 234.4157                         | 5.1913                | 234.7293                                                | 1.8583                | 228.4917                                             | 6.0389                | 228.7371                                                                  | 3.7158                |
| 242.3978                         | 14.1271               | 245.0301                                                | 11.4934               | 252.8347                                             | 12.4576               | 255.1092                                                                  | 10.6634               |
| 275.1414                         | 2.4789                | 272.6038                                                | 7.1822                | 275.538                                              | 0.6446                | 274.7404                                                                  | 3.9972                |
| 307.2149                         | 132.6844              | 310.6085                                                | 103.1665              | 322.2015                                             | 47.6087               | 325.3439                                                                  | 19.579                |
| 326.2706                         | 70.873                | 334.9631                                                | 73.7484               | 334.2352                                             | 12.5553               | 339.732                                                                   | 12.687                |
| 342.8666                         | 13.242                | 342.5924                                                | 18.4815               | 348.3277                                             | 43.1063               | 356.2834                                                                  | 41.1346               |
| 361.8599                         | 72.9326               | 362.7549                                                | 77.6933               | 367.3489                                             | 171.2607              | 378.5724                                                                  | 162.7356              |
| 389.7496                         | 0.0152                | 388.1953                                                | 0.0026                | 377.7151                                             | 5.8749                | 379.2868                                                                  | 9.9191                |
| 401.1603                         | 4.2606                | 395.4016                                                | 9.0536                | 382.5082                                             | 0.2137                | 386.366                                                                   | 13.5687               |
| 414.2977                         | 29.8611               | 415.8197                                                | 28.1183               | 393.2437                                             | 8.025                 | 390.6222                                                                  | 8.8429                |
| 427.7643                         | 1.9514                | 442.7101                                                | 5.4746                | 399.4135                                             | 5.9332                | 411.2613                                                                  | 7.0534                |
| 446.8648                         | 30.6541               | 445.3722                                                | 18.0762               | 446.0432                                             | 35.4152               | 443.1355                                                                  | 27.4313               |
| 484.6092                         | 20.5705               | 484.2598                                                | 15.0985               | 474.4636                                             | 32.0168               | 475.1933                                                                  | 32.1246               |
| 506.6761                         | 6.9959                | 508.7276                                                | 9.0354                | 491.6914                                             | 14.2257               | 494.3538                                                                  | 7.1266                |
| 531.1007                         | 12.1121               | 530.5372                                                | 12.1406               | 516.9223                                             | 95.0852               | 527.5215                                                                  | 101.9926              |
| 573.1589                         | 10.5929               | 569.9554                                                | 2.0335                | 532.5081                                             | 22.7371               | 532.5665                                                                  | 29.5609               |
| 578.3782                         | 25.4935               | 571.7317                                                | 9.4463                | 569.4083                                             | 10.5547               | 565.0687                                                                  | 8.8529                |
| 588.0752                         | 29.5041               | 586.5779                                                | 8.8046                | 572.1875                                             | 43.5524               | 570.2265                                                                  | 14.9776               |
| 644.6772                         | 42.9859               | 648.7096                                                | 13.9742               | 577.0581                                             | 46.5976               | 577.1397                                                                  | 17.5255               |
| 659.5016                         | 9.6301                | 662.2956                                                | 16.4632               | 632.3129                                             | 58.1175               | 636.6498                                                                  | 24.1889               |
| 681.0447                         | 3.0533                | 680.735                                                 | 2.975                 | 650.8869                                             | 13.3196               | 654.2616                                                                  | 19.3105               |
| 685.5987                         | 25.913                | 687.165                                                 | 27.6446               | 677.5473                                             | 1.8018                | 676.9925                                                                  | 2.0846                |
| 709.9443                         | 46.4729               | 713.263                                                 | 47.8733               | 685.7851                                             | 10.3106               | 688.328                                                                   | 8.7931                |
| 724.2883                         | 119.0037              | 726.8449                                                | 115.2669              | 716.7702                                             | 75.0355               | 718.7266                                                                  | 67.0797               |
| 758.6513                         | 0.8979                | 760.527                                                 | 1.6427                | 721.0433                                             | 45.6343               | 723.4964                                                                  | 51.5842               |



|           |          |           |          |           |          |           |          |
|-----------|----------|-----------|----------|-----------|----------|-----------|----------|
| 768.2908  | 10.4063  | 767.3981  | 12.3137  | 759.2922  | 2.5254   | 761.0462  | 11.5723  |
| 777.0901  | 6.5682   | 777.7584  | 0.5471   | 763.2338  | 15.5522  | 761.8175  | 16.9145  |
| 804.6222  | 2.4777   | 792.8341  | 46.9401  | 774.9663  | 6.3275   | 778.3444  | 4.7025   |
| 868.3109  | 27.8206  | 838.7765  | 80.3899  | 802.0991  | 0.7575   | 797.1324  | 34.5858  |
| 897.374   | 0.0142   | 868.7225  | 25.6459  | 858.1057  | 25.594   | 845.3882  | 94.0483  |
| 919.0656  | 30.3012  | 896.7646  | 0.014    | 887.981   | 4.6036   | 856.8671  | 21.2165  |
| 943.0363  | 0.4728   | 923.8205  | 1.3855   | 920.8686  | 28.1823  | 885.5012  | 5.9362   |
| 956.4919  | 2.6757   | 943.7045  | 8.8832   | 942.7882  | 3.1932   | 928.0039  | 1.6757   |
| 964.194   | 20.9135  | 948.7987  | 6.9942   | 960.2538  | 2.6696   | 944.3385  | 1.3757   |
| 988.021   | 99.0099  | 965.7594  | 21.2731  | 970.6297  | 23.614   | 960.0748  | 4.5573   |
| 1005.9005 | 1.0904   | 1000.3005 | 89.3395  | 987.7392  | 107.5333 | 976.6998  | 19.9807  |
| 1012.44   | 0.842    | 1007.0569 | 0.9915   | 1004.1209 | 2.0564   | 1001.6506 | 62.6437  |
| 1018.8163 | 25.2974  | 1012.7972 | 0.896    | 1013.1509 | 0.0764   | 1004.3553 | 9.3225   |
| 1020.5884 | 0.0327   | 1021.5049 | 0.0042   | 1023.152  | 1.7924   | 1012.9122 | 0.2123   |
| 1028.6993 | 146.8453 | 1028.6048 | 121.2371 | 1028.7059 | 70.8564  | 1023.5898 | 1.4821   |
| 1054.2303 | 1.7841   | 1045.5214 | 156.2667 | 1044.5812 | 44.7059  | 1043.6115 | 38.157   |
| 1071.0244 | 20.1984  | 1058.2166 | 9.3182   | 1054.863  | 1.8743   | 1053.2331 | 150.1935 |
| 1089.1134 | 17.1726  | 1079.3752 | 30.0903  | 1070.5119 | 36.4706  | 1059.1013 | 10.9647  |
| 1094.9922 | 19.2006  | 1089.5826 | 8.715    | 1096.9111 | 24.6847  | 1077.1515 | 50.5192  |
| 1112.5323 | 0.2242   | 1094.5212 | 58.5693  | 1126.1366 | 1.8679   | 1097.2498 | 29.5832  |
| 1162.4045 | 28.2681  | 1113.9872 | 0.1414   | 1139.2553 | 16.0049  | 1127.0472 | 2.6504   |
| 1199.8916 | 78.2306  | 1170.0009 | 63.4359  | 1184.6739 | 20.7279  | 1139.7345 | 21.6335  |
| 1210.9551 | 222.0794 | 1206.6125 | 12.9535  | 1197.4184 | 262.4239 | 1185.0499 | 24.3526  |
| 1239.7413 | 6.3291   | 1221.55   | 220.0644 | 1205.8372 | 23.892   | 1210.2467 | 93.4085  |
| 1271.923  | 10.9713  | 1240.5211 | 8.5627   | 1248.6067 | 0.2557   | 1212.931  | 153.5637 |
| 1290.7345 | 183.6294 | 1269.0948 | 66.1766  | 1268.7367 | 29.7114  | 1249.1931 | 1.3644   |
| 1313.8037 | 33.6744  | 1273.529  | 84.0027  | 1294.9129 | 146.0525 | 1268.4797 | 36.4896  |
| 1322.9928 | 117.2383 | 1322.883  | 5.1542   | 1309.9164 | 68.1239  | 1269.5784 | 120.2056 |
| 1335.3384 | 185.6072 | 1330.3139 | 107.1675 | 1323.7523 | 160.913  | 1317.7421 | 80.0155  |
| 1360.7518 | 49.4772  | 1349.6012 | 215.9752 | 1334.8938 | 156.3798 | 1335.0247 | 116.2449 |
| 1370.1608 | 10.4995  | 1362.9327 | 157.997  | 1366.9764 | 24.2285  | 1340.7034 | 220.1215 |
| 1392.4778 | 133.6368 | 1376.5108 | 20.3876  | 1374.3173 | 17.8096  | 1367.9302 | 22.38    |
| 1406.2334 | 93.4305  | 1394.0202 | 147.102  | 1386.602  | 64.7543  | 1382.8585 | 99.4278  |
| 1411.0356 | 43.7954  | 1408.037  | 100.5121 | 1407.0177 | 67.2843  | 1390.9144 | 41.5668  |
| 1420.056  | 37.3025  | 1413.5022 | 68.3857  | 1411.7709 | 4.2769   | 1406.5305 | 84.6292  |
| 1441.4403 | 34.132   | 1428.5825 | 0.7993   | 1420.9861 | 248.529  | 1417.9324 | 75.4091  |
| 1464.8216 | 24.0521  | 1439.2068 | 127.7159 | 1442.9953 | 42.985   | 1424.382  | 277.9275 |
| 1466.696  | 12.9838  | 1441.0409 | 17.0184  | 1464.0591 | 20.5289  | 1436.3918 | 46.4866  |
| 1484.4706 | 0.406    | 1452.5898 | 17.2585  | 1466.9238 | 11.9881  | 1444.1347 | 58.2644  |
| 1511.4655 | 6.8765   | 1483.5307 | 84.593   | 1481.8412 | 19.6399  | 1450.6801 | 18.1352  |
| 1527.9143 | 90.975   | 1506.8754 | 62.1254  | 1501.7131 | 276.7395 | 1484.1661 | 29.605   |
| 1547.6089 | 175.4316 | 1512.7694 | 194.8291 | 1510.1026 | 95.1683  | 1497.8937 | 28.2637  |
| 1555.7466 | 409.2188 | 1530.5032 | 62.5926  | 1528.3657 | 17.5683  | 1511.2638 | 150.228  |
| 1600.9509 | 29.0366  | 1537.3157 | 913.9686 | 1550.9473 | 200.5191 | 1521.0975 | 247.1019 |
| 1607.3552 | 72.055   | 1601.5583 | 19.5639  | 1595.6693 | 523.6791 | 1533.2596 | 219.8729 |
| 1633.533  | 157.4605 | 1616.7061 | 59.67    | 1599.537  | 73.1049  | 1596.5214 | 697.595  |

|           |         |           |          |           |          |           |          |
|-----------|---------|-----------|----------|-----------|----------|-----------|----------|
| 1652.3646 | 90.137  | 1634.8639 | 56.6169  | 1605.9305 | 72.7645  | 1601.7871 | 53.2729  |
| 3035.7151 | 23.1871 | 1654.4142 | 16.592   | 1633.0606 | 2.1181   | 1619.4743 | 14.3173  |
| 3036.9091 | 69.332  | 1671.4424 | 63.2817  | 1665.7776 | 119.0373 | 1631.2484 | 10.3029  |
| 3077.4837 | 28.8951 | 3048.8531 | 2.0873   | 3038.5267 | 13.7095  | 1665.1815 | 68.3969  |
| 3081.5561 | 16.6951 | 3051.1135 | 48.7685  | 3043.7089 | 58.4046  | 1683.9327 | 37.0949  |
| 3135.0695 | 22.3581 | 3092.6891 | 19.0749  | 3081.6607 | 26.6635  | 3049.9363 | 2.2248   |
| 3158.8913 | 48.2008 | 3103.4776 | 0.5564   | 3085.7377 | 12.9396  | 3057.3096 | 33.2516  |
| 3162.7535 | 25.3185 | 3138.0642 | 14.6299  | 3139.8591 | 17.9461  | 3097.251  | 19.1149  |
| 3163.8754 | 42.3783 | 3161.7605 | 44.5016  | 3170.5215 | 81.731   | 3105.2606 | 0.0426   |
| 3196.1476 | 29.7964 | 3165.6153 | 22.6809  | 3172.4863 | 32.3366  | 3141.6091 | 12.26    |
| 3219.5038 | 2.7506  | 3204.9938 | 48.5017  | 3172.5185 | 31.1527  | 3172.3466 | 132.7629 |
| 3219.9951 | 3.545   | 3220.8959 | 2.7319   | 3176.0064 | 10.4864  | 3174.6032 | 26.4247  |
| 3791.7181 | 68.6433 | 3221.4451 | 3.8439   | 3207.2216 | 3.0449   | 3178.1034 | 8.9881   |
|           |         | 3251.4903 | 4.78     | 3222.7063 | 2.7167   | 3208.2745 | 2.8533   |
|           |         | 3542.8436 | 364.4055 | 3562.0762 | 182.7717 | 3223.9175 | 2.9586   |
|           |         | 3790.7043 | 91.1436  | 3792.613  | 77.5165  | 3258.4556 | 10.2695  |
|           |         |           |          |           |          | 3528.6563 | 337.407  |
|           |         |           |          |           |          | 3554.4004 | 198.7356 |
|           |         |           |          |           |          | 3792.9931 | 99.4694  |

**Table S15.** Calculated TD-DFT spectra of different protonated species of complex formed by gold(III) and hydrazone derived from pyridoxal and isoniazid (**PL-INH**)

| Deprotonated complex, [AuCIL] |                     | Monoprotonated complex 1, [AuCl(HL)] <sup>+</sup> |                     | Monoprotonated complex 2, [AuCl(HL)] <sup>+</sup> |                     | <i>Bis</i> -protonated complex, [AuCl(H <sub>2</sub> L)] <sup>2+</sup> |                     |
|-------------------------------|---------------------|---------------------------------------------------|---------------------|---------------------------------------------------|---------------------|------------------------------------------------------------------------|---------------------|
| $\lambda$ , nm                | oscillator strength | $\lambda$ , nm                                    | oscillator strength | $\lambda$ , nm                                    | oscillator strength | $\lambda$ , nm                                                         | oscillator strength |
| 461.49                        | 0.0001              | 420.98                                            | 0.0002              | 523.28                                            | 0.0001              | 448.8                                                                  | 0.0001              |
| 368.06                        | 0.1511              | 372.57                                            | 0.2854              | 381.75                                            | 0.0681              | 379.6                                                                  | 0.0183              |
| 367.15                        | 0.0253              | 346.9                                             | 0                   | 371.74                                            | 0.0001              | 366.96                                                                 | 0                   |
| 318.76                        | 0.0241              | 328.97                                            | 0.0479              | 357.25                                            | 0.0524              | 361.84                                                                 | 0.1542              |
| 305.89                        | 0.0001              | 316.98                                            | 0.0001              | 315.03                                            | 0.0005              | 299.64                                                                 | 0.0002              |
| 299.08                        | 0.3955              | 304.39                                            | 0.3874              | 313.45                                            | 0.0034              | 296.66                                                                 | 0.0057              |
| 295.24                        | 0.0482              | 282.82                                            | 0.0656              | 301.89                                            | 0.004               | 288.54                                                                 | 0.0077              |
| 279.41                        | 0.0297              | 277.18                                            | 0.0021              | 287.44                                            | 0.0182              | 283.74                                                                 | 0.1506              |
| 266.36                        | 0.0029              | 269.54                                            | 0.0009              | 282.97                                            | 0.2346              | 281.19                                                                 | 0.1866              |
| 263.53                        | 0.1935              | 267.79                                            | 0.0553              | 279.27                                            | 0.1848              | 270.81                                                                 | 0.025               |
| 261.14                        | 0.2276              | 259.53                                            | 0.2118              | 272.04                                            | 0.4007              | 264.44                                                                 | 0.0063              |
| 253.13                        | 0.0967              | 252.56                                            | 0.0244              | 269.12                                            | 0.0678              | 260.17                                                                 | 0.3245              |
| 246.61                        | 0.0022              | 252.55                                            | 0.0008              | 257.02                                            | 0.0126              | 255.71                                                                 | 0.242               |
| 242.21                        | 0.3022              | 248.05                                            | 0.0005              | 253.39                                            | 0.0386              | 249.76                                                                 | 0.0037              |
| 239.56                        | 0.0001              | 239.49                                            | 0.1086              | 244.49                                            | 0.1984              | 241.69                                                                 | 0.0898              |
| 234.01                        | 0.0962              | 237.06                                            | 0.3734              | 238.73                                            | 0.0036              | 237.28                                                                 | 0.2572              |
| 229.83                        | 0.0316              | 233.58                                            | 0.0769              | 237.69                                            | 0.0589              | 234.27                                                                 | 0.0761              |
| 227.02                        | 0.0023              | 231.05                                            | 0.0105              | 233.56                                            | 0.0955              | 230.51                                                                 | 0.0103              |
| 224.27                        | 0.0592              | 229.69                                            | 0.0297              | 225.22                                            | 0.1952              | 226.74                                                                 | 0.0257              |
| 220.64                        | 0.0387              | 220.78                                            | 0.0233              | 221.66                                            | 0.0188              | 223.81                                                                 | 0.0548              |
| 218.38                        | 0.0064              | 220.46                                            | 0.0083              | 221.52                                            | 0.0221              | 222.76                                                                 | 0.0028              |
| 217.7                         | 0.0008              | 219.45                                            | 0.0005              | 220.63                                            | 0.0973              | 222.63                                                                 | 0.0032              |
| 216.17                        | 0.0579              | 218.83                                            | 0.0441              | 216.73                                            | 0.0052              | 220.45                                                                 | 0.0193              |
| 211.51                        | 0.1382              | 218.16                                            | 0.0179              | 212.56                                            | 0.0647              | 219.38                                                                 | 0.0406              |
| 210.56                        | 0.0654              | 216.11                                            | 0.0493              | 211.45                                            | 0.0011              | 213.97                                                                 | 0.1078              |
| 208.32                        | 0.0101              | 212.05                                            | 0.0017              | 210.42                                            | 0.1053              | 210.94                                                                 | 0.2199              |
| 208.02                        | 0.0254              | 209.85                                            | 0.2567              | 207.87                                            | 0.059               | 209.11                                                                 | 0.0742              |
| 206.11                        | 0.0313              | 208.61                                            | 0.0405              | 204.83                                            | 0.0187              | 205.47                                                                 | 0.2237              |
| 205.16                        | 0.2111              | 204.87                                            | 0.0252              | 204.03                                            | 0.0207              | 198.77                                                                 | 0.0478              |
| 203.94                        | 0.0858              | 202                                               | 0.0244              | 203.9                                             | 0.0366              | 198.48                                                                 | 0.0195              |

**Table S16.** Shape of selected frontier molecular orbitals of gold(III) complexes with hydrazones derived pyridoxal obtained by DFT calculations

| PL-F3H                                  |                                                                                     |                                                                                     |                                                                                      |                                                                                       |                                                                                       |                                                                                       |
|-----------------------------------------|-------------------------------------------------------------------------------------|-------------------------------------------------------------------------------------|--------------------------------------------------------------------------------------|---------------------------------------------------------------------------------------|---------------------------------------------------------------------------------------|---------------------------------------------------------------------------------------|
| [AuClL]                                 | 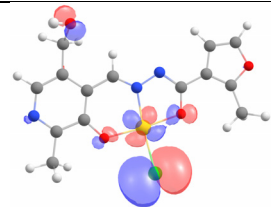   |    |    |    |    |    |
|                                         | HOMO-5(88)                                                                          | HOMO-2(91)                                                                          | HOMO-1(92)                                                                           | HOMO(93)                                                                              | LUMO(94)                                                                              | LUMO+1(95)                                                                            |
| [AuCl(HL)] <sup>+</sup> 2               |    |    |    |    |    |    |
|                                         | HOMO-5(88)                                                                          | HOMO-2(91)                                                                          | HOMO-1(92)                                                                           | HOMO(93)                                                                              | LUMO(94)                                                                              | LUMO+1(95)                                                                            |
| [AuCl(H <sub>2</sub> L)] <sup>+</sup> 2 |   |   |   |   |   |   |
|                                         | HOMO-3(90)                                                                          | HOMO-2(91)                                                                          | HOMO-1(92)                                                                           | HOMO(93)                                                                              | LUMO(94)                                                                              | LUMO+1(95)                                                                            |
| PL-F2H                                  |                                                                                     |                                                                                     |                                                                                      |                                                                                       |                                                                                       |                                                                                       |
| [AuClL]                                 |  |  |  |  |  |  |
|                                         | HOMO-3(86)                                                                          | HOMO-2(87)                                                                          | HOMO-1(88)                                                                           | HOMO(89)                                                                              | LUMO(90)                                                                              | LUMO+1(91)                                                                            |





|                            |                                                                                     |                                                                                     |                                                                                      |                                                                                       |                                                                                       |                                                                                       |
|----------------------------|-------------------------------------------------------------------------------------|-------------------------------------------------------------------------------------|--------------------------------------------------------------------------------------|---------------------------------------------------------------------------------------|---------------------------------------------------------------------------------------|---------------------------------------------------------------------------------------|
| [AuCl]                     | 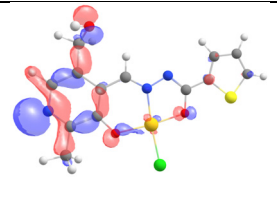   |    |    |    |    |    |
|                            | HOMO-3(90)                                                                          | HOMO-2(91)                                                                          | HOMO-1(92)                                                                           | HOMO(93)                                                                              | LUMO(94)                                                                              | LUMO+1(95)                                                                            |
| [AuCl(HL)] <sup>+</sup> 2  |    |    |    |    |    |    |
|                            | HOMO-9(84)                                                                          | HOMO-6(87)                                                                          | HOMO-2(91)                                                                           | HOMO(93)                                                                              | LUMO(94)                                                                              | LUMO+1(95)                                                                            |
| [AuCl(HzL)] <sup>+</sup> 2 |    |    |    |    |    |    |
|                            | HOMO-4(89)                                                                          | HOMO-1(92)                                                                          | HOMO(93)                                                                             | LUMO(94)                                                                              | LUMO+1(95)                                                                            | LUMO+2(96)                                                                            |
| PL-INH                     |                                                                                     |                                                                                     |                                                                                      |                                                                                       |                                                                                       |                                                                                       |
| [AuCl]                     |   |   |   |   |   |   |
|                            | HOMO-3(89)                                                                          | HOMO-2(90)                                                                          | HOMO-1(91)                                                                           | HOMO(92)                                                                              | LUMO(93)                                                                              | LUMO+1(94)                                                                            |
| [AuCl(HL)] <sup>+</sup> 2  |  |  |  |  |  |  |
|                            | HOMO-6(86)                                                                          | HOMO-2(90)                                                                          | HOMO-1(91)                                                                           | HOMO(92)                                                                              | LUMO(93)                                                                              | LUMO+1(94)                                                                            |

|                                        |                                                                                   |                                                                                   |                                                                                    |                                                                                     |                                                                                     |                                                                                     |
|----------------------------------------|-----------------------------------------------------------------------------------|-----------------------------------------------------------------------------------|------------------------------------------------------------------------------------|-------------------------------------------------------------------------------------|-------------------------------------------------------------------------------------|-------------------------------------------------------------------------------------|
| [AuCl(H <sub>2</sub> L)] <sup>-2</sup> | 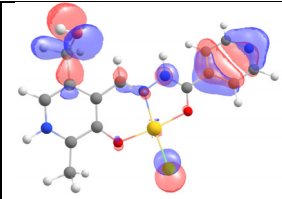 |  |  |  |  |  |
|                                        | HOMO-6(86)                                                                        | HOMO-4(88)                                                                        | HOMO-3(89)                                                                         | HOMO(92)                                                                            | LUMO(93)                                                                            | LUMO+1(94)                                                                          |
